# Supplementary material for: Protein Disulfide Isomerase Family A Member 3 Knockout Abrogate Effects of Vitamin D on Cellular Respiration and Glycolysis in Squamous Cell Carcinoma
Source: MDPI journal article supplement (doi:10.3390/nu15214529), 2023-10-25
Supplement: s1 [file s1]

| MitoCarta | PDIA3 D3  | PDIA3 NT | MitoCarta PDIA3 D3 | MitoCarta PDIA3 NT | PDIA3 D3 PDIA3 NT | MitoCarta PDIA3 D3 PDIA3 NT |
|-----------|-----------|----------|--------------------|--------------------|-------------------|-----------------------------|
| COQ7      | EFL1      | PDIA3    | COX5A              | CYC1               | SLC44A5           | PDHA1                       |
| SDHA      | ANO10     | EPHA3    | CS                 | SDHB               | SLCO1A2           | COQ9                        |
| COQ5      | ARHGEF16  | KRT81    | DLAT               | UQCRC1             | SH3TC1            | DBT                         |
| MRPL12    | GASK1B    | ZNF888   | ATP5F1E            | ATP5F1A            | RNF39             | LRPPRC                      |
| ATP5F1D   | TMOD1     | FAM174B  | MRPS15             | OGDH               | SCEL              | NDUFS1                      |
| ISCA2     | IL1RL1    | PDE3A    | MRPL34             | UQCRC2             | BAIAP2L2          | OPA1                        |
| PMPCB     | SEMA3B    | ZNF83    | LETMD1             | SDHD               | CD86              | ECHDC3                      |
| UQCRFS1   | SP140L    | CNTN1    | AUH                | MDH2               | TIMP3             | APOOL                       |
| PDHB      | OLR1      | IFNGR2   | NDUFB8             | MRPS27             | ELL2              | ACADM                       |
| MRPS35    | SERINC2   | CDH13    | MRRF               | GRPEL1             | GOLM1             | SLC25A4                     |
| UQCRCQ    | CLMN      | ZNF468   | MTIF2              | DLST               | PTPN1             | ACO2                        |
| MRPL53    | GPRC5A    | BAG6     | SURF1              | PDHX               | WNT7B             | HIBCH                       |
| PDK4      | DHRS3     | RPS6KA2  | GUF1               | ATP5F1B            | COL16A1           | HSPA9                       |
| GFM1      | DUSP10    | PLTP     | SDHAF2             | SDHAF4             | G6PD              | MRPL40                      |
| MPC2      | LBH       | TMEM50B  | MTCH2              | UQCR10             | ZNF185            | SUCLG2                      |
| MRPL46    | EAF2      | CLCA2    | HADH               | COQ3               | TMPRSS4           | SLC25A1                     |
| SLC25A3   | NET1      | P2RY1    | ACAT1              | IDH3A              | CASC9             | NDUFA2                      |
| MRPS23    | ARHGEF28  | NEFL     | MALSU1             | TIMM10             | ZNF704            | ALDH6A1                     |
| FH        | LINC00649 | C12orf75 | CLPX               | UQCRH              | PPP3CA            | ALDH2                       |
| PMPCA     | LDLRAP1   | ABCC4    | MECR               | HIGD2A             | KDM1A             | SLC25A12                    |
| ISCA1     | BBOX1-AS1 | SSBP2    | SLC25A11           | ECHS1              | AFAP1L2           | DNAJA3                      |
| SUCLA2    | GNAI2     | GALNT14  | TACO1              | COX6A1             | PKP1              | NDUFB2                      |
| IARS2     | APOBEC3B  | HLA-DPA1 | MRPL33             | COX15              | KLK6              | COQ10B                      |
| COX11     | MOK       | RARRES1  | SLC25A42           | AFG3L2             | CYP3A5            | IDH2                        |
| ETFDH     | NTN4      | ZNF808   | TOMM7              | HADHA              | JUNB              | MRPL9                       |
| MRPL2     | LINC01748 | SERPINE2 | GATB               | ETFA               | AIG1              | NDUFA8                      |
| BCKDHA    | KLK13     | AJAP1    | MRPL28             | CPT2               | ADGRD2            | GLS                         |
| ATP5PO    | PEX13     | VPS52    | NFU1               | IDH3B              | FAM126A           | VWA8                        |

|          |            |          |          |         |         |            |
|----------|------------|----------|----------|---------|---------|------------|
| NDUFS7   | CALML3     | MLLT3    | ACADVL   | LARS2   | ADGRE5  | AK4        |
| BCKDHB   | COPG2      | FADS2    | ABCB7    | ACADS   | ITGB6   | TXNRD2     |
| NDUFV2   | HOMER3     | RAB31    | ALDH9A1  | LETM1   | DDK1    | MTHFD1L    |
| COQ6     | WEE1       | HLA-DQB1 | MARS2    | ATP5ME  | FUT3    | ATAD1      |
| MRPL43   | TSKU       | GOLIM4   | PPIF     | SUCLG1  | ABHD12  | MTG2       |
| ABHD11   | HSD17B2    | PFKM     | L2HGDH   | ATP5PF  | MELTF   | TIMM17B    |
| LONP1    | CETN2      | KCNMA1   | ETHE1    | DLD     | PDGFA   | CARS2      |
| MRPL10   | CDA        | LEMD2    | MRPL20   | AIFM1   | ZNF641  | ALDH1B1    |
| NDUFS8   | RAB38      | RASSF8   | ACAA2    | TIMM9   | AKR1C3  | COX10      |
| IMMT     | MXD1       | GRIK2    | AFG1L    | SAMM50  | CAPNS1  | AKAP1      |
| FECH     | CREG2      | PON2     | ATP5IF1  | NDUFS2  | ELAPOR2 | MCUR1      |
| PHB      | DUSP5      | PELI2    | POLDIP2  | NDUFV1  | PLEKHG3 | TMEM14C    |
| MRPS2    | CHST15     | SLC4A2   | SLC25A13 | SUPV3L1 | GEM     | PDP1       |
| TIMM13   | BLVRA      | TNIK     | SLC25A19 | PRDX3   | ZBED6CL | PTCD2      |
| MRPL16   | MIR4713HG  | CDK14    | NDUFA10  | GHITM   | KCNK5   | NAXE       |
| IDH3G    | ST6GALNAC1 | ADAMTS15 | MSRB2    | LYRM4   | PADI3   | MTHFD2     |
| SDHC     | SGSM2      | C1S      | LACTB    | NDUFB5  | CD14    | GSR        |
| COQ10A   | MACC1      | KLHL13   | ADCK5    | MRPS18A | RNF145  | GADD45GIP1 |
| GATD3A   | METAP1     | MAPK14   | THEM4    | NDUFB9  | FOCAD   | ALDH18A1   |
| TXN2     | SULT1A1    | EHMT2    | MRPS10   | NDUFA6  | MFGE8   | TMEM65     |
| COX6C    | ARSI       | STC1     | MRPL41   | MICOS10 | ERMP1   | PRDX5      |
| SLC25A20 | CLCF1      | ADGRL2   | MRPS6    | VDAC1   | STEAP4  | SLC25A46   |
| MRPL1    | RHOF       | KLHDC2   | MCCC2    | CLPP    | TENT5A  | CROT       |
| TIMM44   | IRF1       | ZNF76    | MRPL51   | NDUFS4  | RAPGEF3 | ALDH7A1    |
| COX17    | KCNN4      | ALOX12   | FAM210A  | C1QBP   | IGFBP3  | YME1L1     |
| SOD2     | MVK        | HLA-A    | NIPSNAP2 | PITRM1  | DGAT2   | ABCD3      |
| COX6B1   | CLCA4      | PRKCQ    | NDUFB7   | MRPS14  | FANCE   | ALDH1L2    |
| ACADL    | SLC6A12    | ZNF680   | SCO2     | ABCB8   | MYO1D   | NNT        |
| MRPL4    | MACO1      | ZNF320   | NARS2    | ATP5F1C | MBOAT1  | GLS2       |
| UQCCL1   | MPZL2      | MUC16    | ZADH2    | PPTC7   | CNGA1   | GPT2       |

|          |           |            |          |         |           |          |
|----------|-----------|------------|----------|---------|-----------|----------|
| MRPL55   | FMN1      | SLCO1B3    | TRIAP1   | COX5B   | ALOX5     | FAM162A  |
| MRM1     | PLEKHO2   | ZNF260     | PTCD3    | ALAS1   | ST3GAL1   | FASTKD1  |
| MRPL44   | LINC01967 | ESYT2      | SLC25A16 | MTO1    | SEMA3F    | HADHB    |
| HSDL2    | ARHGEF3   | BSPRY      | SELENOO  | NDUFA5  | CAVIN2    | STOM     |
| ATPAF2   | SNX30     | PBX2       | HSD17B4  | NDUFB6  | GPRC5B    | DGLUCY   |
| NDUFA9   | ADA       | KIFC1      | OXLD1    | MTX2    | SIX2      | PCK2     |
| COA6     | EHBP1L1   | CMTR1      | NDUFA11  | FDX1    | IGHE      | ACACA    |
| POLRMT   | XCL1      | RXRB       | AURKAIP1 | TIMM50  | EMP1      | ABAT     |
| ISCU     | DLK2      | NPR2       | GLUD1    | VDAC2   | LINC00491 | ALDH5A1  |
| RTN4IP1  | CLDN1     | ZNF875     | MRPS33   | CMC1    | IDO1      | PISD     |
| OGDHL    | SLC4A11   | KLHDC3     | MPV17L   | NDUFB10 | HK1       | GARS1    |
| BCKDK    | TMEM79    | CLDN11     | TFAM     | ACADSB  | TPM4      | LYPLAL1  |
| GFM2     | HCAR3     | CGREF1     | OXA1L    | COQ4    | PKP2      | FPGS     |
| NDUF4F4  | KCTD3     | SLC47A2    | PDPR     | MRPL24  | KRT6B     | MAVS     |
| SLC25A35 | TPRG1     | ZSWIM5     | NLN      | HSPD1   | TRIM6     | ACACB    |
| TIMM8B   | HR        | NELFE      | HDHD5    | NDUFS5  | LMO4      | CCDC51   |
| MCAT     | LHX6      | SERPINB9P1 | MMAB     | CYCS    | ANO1      | NSUN4    |
| IBA57    | CEACAM6   | AARS1      | PXMP2    | LYRM7   | SRPX2     | METAP1D  |
| PHB2     | SRGAP3    | EZR        | TCAIM    | PCCA    | ETNK2     | KARS1    |
| DAP3     | MFSD4A    | CLIC3      | MTFR1L   | CLPB    | CTSD      | SFXN2    |
| CMC2     | COL13A1   | MYO1B      | PRELID3A | MRPL36  | CCDC162P  | FASN     |
| SDHAF1   | F2RL1     | VTI1B      | TOMM70   | FARS2   | TM4SF1    | TXNRD1   |
| MRPS17   | PAX9      | ATF6B      | SFXN5    | FDXR    | CAMP      | BCL2L13  |
| ADHFE1   | APOL6     | RIPK1      | FIS1     | GATC    | PLAC8     | TWNK     |
| NFS1     | HIVEP2    | ARHGEF35   | SLC25A40 | TRAP1   | CAPN2     | FTH1     |
| NDUF4F5  | GDF15     | IRX3       | SLC25A23 | IVD     | COL28A1   | PDP2     |
| MRPL17   | NUDT18    | SYTL5      | SLC25A36 | SLC25A5 | DEPP1     | SLC25A37 |
| MFN1     | MARCHF3   | AFAP1-AS1  | NMNAT3   | ETFB    | CDH8      | SLC25A43 |
| MRPL11   | THBD      | HTRA3      | NADK2    | ATP5PB  | LIPH      | NUDT5    |
| COX4I1   | LRG1      | CPPED1     | FAM136A  | COX7C   | TIMP2     | NDUF4F3  |

|         |            |           |         |          |           |          |
|---------|------------|-----------|---------|----------|-----------|----------|
| NDUFS6  | FGD2       | ZNF607    | GUK1    | CHCHD3   | CDYL      | OCIAD2   |
| MRPL13  | CTSS       | C6orf62   | ECSIT   | ACSF3    | BNC1      | HINT1    |
| OXCT1   | EPB41L1    | APOL1     | GRSF1   | SLC25A10 | HTRA1     | NUDT9    |
| PDK2    | ARRDC4     | EYA1      | DNAJC30 | PDK3     | LINC02348 | BAK1     |
| LIAS    | SPARCL1    | RAB15     | CAT     | CHCHD10  | BMERB1    | MAOB     |
| MRPS28  | PPM1H      | WRNIP1    | STARD7  | CBR4     | WDR72     | FKBP8    |
| ECH1    | GBP4       | ANOS1     | HTATIP2 | HAGH     | ABHD17C   | FBXL4    |
| BCS1L   | P2RY2      | TP63      | NME4    | MRPS16   | ALDH1A3   | MAOA     |
| ERAL1   | SH3BP4     | H1-0      | GOT2    | GPD2     | KRT16     | BCO2     |
| TSFM    | AMDHD1     | CYP2R1    | OXR1    | MT-CO2   | FOS       | COA7     |
| FXN     | GLUL       | IL1B      | AIFM3   | DHTKD1   | TMEM40    | DHRS2    |
| YARS2   | PAQR8      | PGM3      | MGST1   | FAHD2A   | AKR1C1    | C15orf48 |
| MRPL21  | TNFSF15    | LCP1      | BAX     | HSD17B8  | GCNT1     | PARK7    |
| ALDH4A1 | CMIP       | SNCA      | MTPAP   | SPRYD4   | CACNA1I   | NME3     |
| TOMM40L | GPCPD1     | MKRN1     | AHCYL1  | MRPS26   | ZNF488    | AGPAT4   |
| NDUFAF1 | TMEM52B    | ZNF282    | ACSL1   | BPHL     | SYT8      | TDRKH    |
| MRPS9   | SIRPA      | ZNF558    | PTPMT1  | TOMM40   | PXDN      | THEM5    |
| COQ8A   | NEDD9      | TNFRSF10B | PINK1   | ACAD10   | ALG1L     | MGME1    |
| MRPL15  | MMP13      | INSR      | THNSL1  | DNAJC11  | MN1       | AGK      |
| AK3     | IGFN1      | MARVELD3  | ARF5    | GLDC     | BCAS1     | MIEF2    |
| MIPEP   | ARPC2      | KCNS3     | MCUB    | SSBP1    | CD47      | THG1L    |
| CRAT    | MPPED2     | DOK4      | LYRM1   | MRPL23   | MYB       | BOK      |
| PCCB    | ST6GALNAC2 | DSP       | PET100  | SQOR     | NIPAL1    | BCL2L11  |
| MRPS7   | OTUD1      | PPP1R11   | UNG     | GCAT     | MBP       |          |
| MRPL3   | FBXO34     | BRPF3     | TSPO    | ECI2     | CAVIN1    |          |
| PRODH   | SPINK5     | CASTOR2   | UCP2    | ATP5MG   | SPOCD1    |          |
| MCCC1   | TPST1      | CLSTN1    | FASTKD2 | MMUT     | FOXC1     |          |
| MRPS12  | DOP1B      | FHL1      | ABCD1   | ATP5MC3  | MXRA5     |          |
| PDK1    | GATA6      | RING1     | DBI     | MLYCD    | PEX3      |          |
| MRPL49  | LIF        | FBP1      | TK2     | NIT2     | DPY19L1   |          |

|          |             |           |         |          |          |  |
|----------|-------------|-----------|---------|----------|----------|--|
| COX7A2   | PPP2R5A     | CUL4A     | ARL2    | ME2      | LRRC61   |  |
| TMEM126A | MYO18A      | NOL7      | VPS13D  | TUFM     | GSDMB    |  |
| ECHDC2   | GPN1        | SLC39A7   | CYB5R3  | TIMM23   | BLNK     |  |
| HCCS     | MARCHF1     | TSPAN15   | PNKD    | RMND1    | PDE7A    |  |
| HIBADH   | PPP4R1      | ARHGAP24  | BNIP3   | MFN2     | COLCA1   |  |
| MRPL19   | GALNT7      | CUL1      | OCIAD1  | NDUFAB1  | FOSL2    |  |
| SLC25A30 | ALS2CL      | HSPA2     | METTL8  | PDSS2    | RTKN2    |  |
| BDH1     | RBMS2       | LTBP3     | SMIM8   | MRPS25   | WNT9A    |  |
| MTX1     | SEPTIN8     | ZNF44     | TAZ     | ACOT13   | SDC4     |  |
| NDUFA7   | PYY2        | ATXN1     | ACOT11  | CPT1A    | LYPD1    |  |
| TIMM17A  | MMD         | GPHN      | NTHL1   | RPUSD3   | CALML5   |  |
| MRPS18C  | ERBIN       | SMO       | PRDX2   | SPR      | FKBP14   |  |
| ACAD8    | STX6        | ZFP14     | GPAM    | MPV17    | FAM3C    |  |
| TIMM22   | ADGRF1      | CD38      | PRXL2A  | MRPL18   | STRA6    |  |
| MRPS21   | WSB1        | ZNF204P   | POLQ    | CHCHD1   | CRABP2   |  |
| TOMM22   | ELF3        | NRIP3     | LIG3    | MPC1     | CYP4F3   |  |
| MRPL30   | TRAF4       | ZNF701    | BNIP3L  | IDE      | PTPRS    |  |
| MRPS34   | ACBD3       | LINC01133 | CYP24A1 | GSTK1    | SERPINE1 |  |
| ME3      | DNAH5       | PLEKHG4   | PMAIP1  | HSPE1    | OSMR     |  |
| MRPL22   | CYTIP       | ZNF28     | SLC8B1  | MRPL54   | SLC9A1   |  |
| GCDH     | FAM198B-AS1 | ABCC1     | MYO19   | MTCH1    | PEG10    |  |
| MRPL47   | LINC02474   | PON3      | SEPTIN4 | AK2      | UGT1A10  |  |
| PPA2     | WSB2        | PPFIA3    | SPTLC2  | NOA1     | DAB2IP   |  |
| WARS2    | LASTR       | DOC2A     | NDUFB1  | MRPL35   | AKIRIN1  |  |
| SMDT1    | RHOD        | PNPLA2    | BAD     | NDUFA3   | STING1   |  |
| COX7A1   | MECOM       | RFX5      | BCL2L2  | SFXN1    | SLC43A3  |  |
| MTG1     | EML4        | TBL1X     | DMPK    | XPNPEP3  | KRT14    |  |
| COX14    | WNT5B       | EHD2      | STYXL1  | SLC25A21 | P3H2     |  |
| NDUFA12  | DENND1B     | PRRC2A    | SPHK2   | SLC25A29 | CCND1    |  |
| MTERF2   | NR4A2       | ZNF614    | STX17   | SDHAF3   | UCA1     |  |

|          |          |           |        |          |            |  |
|----------|----------|-----------|--------|----------|------------|--|
| ETFRF1   | PLA2G10  | SNCG      | ARMCX6 | PRELID3B | SLFN11     |  |
| NDUFC2   | HIF1A    | SSR1      |        | NDUFB3   | APMAP      |  |
| SLIRP    | PRKG2    | BST2      |        | C8orf82  | ANKRD9     |  |
| MT-ATP6  | SH3RF1   | SLC22A20P |        | EARS2    | CREG1      |  |
| TIMM21   | IKZF2    | GSTM1     |        | GRHPR    | NOMO1      |  |
| NDUFB11  | EXOC6    | PRSS12    |        | ECHDC1   | DAPK1      |  |
| HINT2    | ABTB2    | SORBS2    |        | HARS2    | OCLN       |  |
| MRPS5    | SREK1IP1 | FNDC10    |        | NDUFA4   | PSAPL1     |  |
| C6orf136 | ABCG2    | SLC7A8    |        | OAT      | CALML3-AS1 |  |
| LIPT2    | FAM160B2 | NUDT3     |        | COX7B    | IFITM10    |  |
| DECR1    | FAM167A  | DYRK3     |        | RARS2    | ELOVL6     |  |
| SLC25A15 | AREG     | AKT3      |        | CHCHD7   | CYP2B7P    |  |
| NDUFV3   | IQUB     | PPP2R2C   |        | SHMT2    | CAMK2A     |  |
| STOML2   | STS      | FERMT1    |        | CPS1     | ABLIM1     |  |
| SLC25A25 | ATOH8    | TPRXL     |        | MTRES1   | TINAGL1    |  |
| CCDC90B  | TP53I11  | SYTL3     |        | TRMT2B   | IL1RAP     |  |
| ALKBH7   | PLAU     | TAF11     |        | ACSF2    | PPT2       |  |
| MPC1L    | CNN3     | BRD2      |        | HMGCL    | KIAA0040   |  |
| MRPL27   | MCFD2    | MATN3     |        | KYAT3    | ITPRIP     |  |
| HSCB     | ATL2     | TDRP      |        | TBRG4    | FAM83F     |  |
| ATAD3A   | STARD13  | LIMCH1    |        | SLC25A44 | LINC02541  |  |
| MRPL37   | SLC35D1  | TRPC1     |        | GSTZ1    | TBC1D8     |  |
| PTGES2   | POR      | SLC36A4   |        | PDF      | BAG3       |  |
| ACSM5    | MEIS1    | PHF10     |        | IMMP2L   | SLC2A12    |  |
| CISD1    | RNF2     | WDR46     |        | MTRF1L   | VDR        |  |
| MTARC2   | HRAT92   | NRG1      |        | ACOT2    | DNAJC3     |  |
| SCO1     | KEL      | KLC4      |        | SIRT3    | BDNF       |  |
| UQCRB    | GDI1     | LRP12     |        | C12orf65 | CDCA7L     |  |
| ATP5PD   | OPHN1    | TTLL7     |        | CPOX     | ATP1B3     |  |
| CCDC58   | BHLHE41  | GAMT      |        | NGRN     | ALCAM      |  |

|          |          |           |  |         |           |  |
|----------|----------|-----------|--|---------|-----------|--|
| MCEE     | SLC31A2  | GADD45B   |  | SIRT5   | TGM1      |  |
| MOCS1    | TJP3     | SGPL1     |  | MACROD1 | SH3BGRL2  |  |
| SLC25A51 | TGFB1    | SENP6     |  | NIT1    | ACAP3     |  |
| SPG7     | KIF13B   | SEPHS1    |  | MCU     | NEO1      |  |
| OXNAD1   | SLC16A3  | DDX39B    |  | CRLS1   | HOXA3     |  |
| DARS2    | TMEM123  | ASIC1     |  | GLYCTK  | TPM2      |  |
| PC       | REEP4    | ACTL8     |  | AARS2   | ANXA11    |  |
| CLYBL    | MLF2     | DAXX      |  | FLAD1   | FAM20C    |  |
| PNPLA8   | LGR4     | PHF1      |  | MPST    | RABGAP1L  |  |
| PYURF    | PPIAP45  | SNRPC     |  | NUDT13  | CARD19    |  |
| MRPL32   | CCNJL    | PLIN2     |  | CKMT1A  | CYP2S1    |  |
| SLC25A26 | SNCAIP   | EZH2      |  | TOMM5   | CRYBG2    |  |
| PRODH2   | RASSF6   | LAMA4     |  | NDUFA1  | DOCK8     |  |
| FDX2     | ZHX2     | POLR2C    |  | D2HGDH  | LUM       |  |
| COX6A2   | TNNI2    | AKR1E2    |  | OPA3    | PPP1R12B  |  |
| SLC30A9  | SVEP1    | ITPR1     |  | MRS2    | PAK6      |  |
| TAMM41   | MICALL1  | LINC01278 |  | HINT3   | NRP1      |  |
| DNLZ     | DPP6     | NELFCD    |  | DGUOK   | TMEM91    |  |
| CHCHD4   | MPHOSPH6 | ZNF777    |  | ACOT9   | SCPEP1    |  |
| ACSM1    | MAP7D2   | G3BP1     |  | ACSS1   | LINC00857 |  |
| COA5     | FBRSL1   | ADGRL1    |  | CHPT1   | UACA      |  |
| COQ2     | PFDN4    | RANBP9    |  | MT-CO3  | SH3PXD2A  |  |
| EHHADH   | BPIFB1   | HEBP2     |  | MTRF1   | RUNX2     |  |
| NDUFS3   | ITGA2    | ARHGAP40  |  | TMEM143 | NLRP10    |  |
| ABCB10   | SLC41A3  | DGKA      |  | TIMM29  | B4GALT1   |  |
| CKMT2    | POU2AF1  | COL4A6    |  | PNPO    | OVCH2     |  |
| ACAD9    | AMZ1     | RHOB      |  | MICU2   | TSLP      |  |
| COX16    | CYB5R4   | RCN3      |  | PCBD2   | CA9       |  |
| DHRS4    | VPS37B   | BLOC1S5   |  | QRSL1   | VASP      |  |
| PRELID2  | ARFGEF3  | LINC00470 |  | PRDX6   | ARFGAP3   |  |

|          |           |         |  |          |         |  |
|----------|-----------|---------|--|----------|---------|--|
| MICOS13  | CYP4B1    | CCHCR1  |  | NAXD     | AATBC   |  |
| GLRX2    | ZNF697    | CMTM6   |  | MT-ND3   | FO XK1  |  |
| MRPS30   | MAPK8IP3  | SMOC2   |  | ACCS     | EPHB3   |  |
| HSD17B10 | ARID3B    | SLC35G1 |  | PTRH2    | FGF1    |  |
| SUOX     | ADAM19    | HLA-C   |  | DNAJC28  | OSR2    |  |
| SARDH    | CTTN      | CHST11  |  | METTL17  | EPHA2   |  |
| RIDA     | CYTH4     | ANXA8L1 |  | ARG2     | VGLL1   |  |
| COX8A    | PTP4A2    | SSRP1   |  | DNM1L    | GATD1   |  |
| TIMM8A   | TRIM56    | ID3     |  | FAM210B  | KLHL29  |  |
| VDAC3    | CEBPB     | IGSF9   |  | COX20    | LDLRAD1 |  |
| SLC25A24 | COPE      | HPS1    |  | HSDL1    | FGFR2   |  |
| SLC25A22 | ANKRD13D  | PRKAG2  |  | PGAM5    | GM2A    |  |
| SLC25A31 | SORL1     | SMARCA1 |  | TRMT10C  | TXK     |  |
| SLC25A18 | CHPF      | BET1L   |  | ACOT7    | BTN3A1  |  |
| TRNT1    | HGS       | PHF19   |  | TFB1M    | MYH16   |  |
| VAR52    | ABCC10    | EXT1    |  | PYCR2    | ACSL5   |  |
| MRPL38   | ARAP3     | STON2   |  | GDAP1    | TPD52L2 |  |
| MRPL58   | TRIM31    | TMEM64  |  | MTIF3    | TM7SF3  |  |
| MRM3     | LINC01605 | ZNF850  |  | ISOC2    | CEBPD   |  |
| TMEM70   | PYGB      | ESRRA   |  | ATP5MC1  | PAM     |  |
| NDUFC1   | ARHGAP23  | NPTN    |  | QDPR     | CBX6    |  |
| PDSS1    | MYO1E     | GNL1    |  | ADCK2    | CST3    |  |
| FMC1     | MAX       | SERTAD2 |  | AGPAT5   | LIMA1   |  |
| ACSM3    | C6orf132  | MAP3K7  |  | MCRIP2   | VSIR    |  |
| NDUFAF6  | NAB2      | HERPUD1 |  | SLC25A28 | RASGRF1 |  |
| UCP1     | IGSF8     | TSPAN7  |  | EPHX2    | SYNJ2   |  |
| GLRX5    | PHKG2     | LAMB2   |  | MICU1    | FBLIM1  |  |
| PTRH1    | TCEAL3    | RGL1    |  | BOLA3    | ANKRD2  |  |
| MRPS11   | EMBP1     | RPRD1A  |  | RSAD1    | AKR1C2  |  |
| ECI1     | CYBRD1    | BTN2A1  |  | PEX11B   | PIFO    |  |



|          |          |          |  |         |           |  |
|----------|----------|----------|--|---------|-----------|--|
| SLC25A45 | MATN2    | SPIRE2   |  | TMEM186 | MUC20     |  |
| SLC25A39 | SLC29A1  | KCNAB2   |  | TOP1MT  | MLKL      |  |
| REXO2    | PLEC     | PIK3R3   |  | RNASEH1 | GALNT12   |  |
| GATM     | ZFP36    | TRPM4    |  | LDHB    | WWTR1     |  |
| TIMM10B  | LRFN4    | SPSB1    |  | YBEY    | COLCA2    |  |
| SARS2    | B3GNT3   | ARHGEF7  |  | MUL1    | RPS6KA5   |  |
| CHDH     | CDC42SE2 | WWP2     |  | BID     | HCAR2     |  |
| MRPL57   | OTUB2    | ANKS1A   |  | SYNJ2BP | SYT7      |  |
| MTFMT    | IRF1-AS1 | CDC25B   |  | MGST3   | CA13      |  |
| NDUFA13  | PLCL1    | CPNE2    |  | ACP6    | EDIL3     |  |
| TMEM11   | FBLN1    | TDP2     |  | DDX28   | LINC01559 |  |
| NAGS     | MAP3K5   | TBC1D22B |  | MTX3    | SPTBN5    |  |
| NDUFAF7  | MAST4    | B3GALNT1 |  | MUTYH   | CDYL2     |  |
| MRPL50   | ATP10D   | SLC16A1  |  | GTPBP6  | PLB1      |  |
| LACTB2   | TMEM171  | KRAS     |  | PPM1K   | IQCB1     |  |
| RMDN1    | SERPINB2 | ADORA1   |  | MSRB3   | SPOCK3    |  |
| MRPL14   | GRINA    | CDKAL1   |  | MARCHF5 | FLNA      |  |
| RDH13    | TPM1     | MAPK15   |  | SFXN4   | PTPRH     |  |
| MRPS24   | B4GALT5  | SCN8A    |  | TRMT5   | GPR78     |  |
| COA3     | PPP1R1C  | TCF25    |  | OGG1    | BTN3A2    |  |
| ENDOG    | BCL6     | TCF19    |  | AIFM2   | PLEKHA7   |  |
| BCAT2    | HS6ST2   | GMPR2    |  | DMAC2L  | CACHD1    |  |
| TEFM     | MAEA     | AKTIP    |  | RMDN3   | FADS1     |  |
| TRMU     | DDX18    | ZNF300   |  | TMLHE   | RARB      |  |
| MRPS22   | WDFY2    | ZNF585B  |  | TOMM20  | ERAP2     |  |
| LAP3     | SLC26A6  | MYADM    |  | MMAA    | MBOAT2    |  |
| FHIT     | CXCR2    | DYNC1LI2 |  | MIEF1   | PITX1     |  |
| NUBPL    | IDH1     | CSNK2A2  |  | UQCC2   | CFAP57    |  |
| LYRM2    | PRKG1    | FIRRE    |  | PDE12   | TFPI      |  |
| OXSM     | AIDA     | TRIM26   |  | DHX30   | HCFC1R1   |  |

|          |            |           |  |          |         |  |
|----------|------------|-----------|--|----------|---------|--|
| TARS2    | EIF5A2     | H3-3B     |  | FASTK    | SASH1   |  |
| ROMO1    | SLC5A12    | ZBTB22    |  | METTL15  | GATA2   |  |
| DNAJC15  | HEG1       | ZNF816    |  | PANK2    | CSAG3   |  |
| MAIP1    | DUSP3      | SLC16A2   |  | NT5DC2   | SLC46A1 |  |
| HIGD1A   | ADAM10     | DLX1      |  | ATAD3B   | LGALS8  |  |
| C16orf91 | SH3GL3     | GLRX      |  | PRKACA   | GRK5    |  |
| RHOT2    | SHTN1      | EML1      |  | COMTD1   | FYB1    |  |
| HAO2     | CD274      | ASCC1     |  | CPT1C    | SULF2   |  |
| RDH14    | SMTN       | GPRIN2    |  | MIGA2    | LRRC58  |  |
| ATP5MPL  | DENND2B    | COL18A1   |  | SND1     | KRT5    |  |
| CA5B     | PTTG1IP    | RTN4RL2   |  | CDK5RAP1 | GDA     |  |
| COASY    | FOXQ1      | ATP1A1    |  | CYP27B1  | TIPARP  |  |
| CISD3    | CYB5R1     | HBS1L     |  | BIK      | PCBP1   |  |
| COX6B2   | CYRIA      | NEK6      |  | MTERF1   | OGFRL1  |  |
| GLOD4    | TMEM51-AS1 | BBOF1     |  | SPATA20  | ZNF812P |  |
| ACAA1    | AMDHD2     | CCDC28A   |  | APEX1    | TLR3    |  |
| COX19    | DLL1       | PCID2     |  | ATPCKMT  | H2BC21  |  |
| AMT      | SLC5A3     | FAAH2     |  | DUS2     | ATP1B1  |  |
| BOLA1    | DTX4       | ROR2      |  | CKMT1B   | EML2    |  |
| ALAS2    | E2F2       | DDX19B    |  | CASP8    | NPNT    |  |
| GRPEL2   | SLC1A3     | PCIF1     |  | BCL2L1   | EFHD2   |  |
| GFER     | INTS6L     | GNG2      |  | EXD2     | RAET1G  |  |
| COX4I2   | MALL       | TPMT      |  | ARMC10   | SLC4A7  |  |
| MRPL39   | STIL       | PRPF6     |  | PREPL    | MLF1    |  |
| AADAT    | RBP1       | PEX26     |  | CEP89    | TIGD2   |  |
| FUNDC2   | JUN        | NUDT16L2P |  | FKBP10   | DPP4    |  |
| LYPLA1   | NAPA       | LARGE2    |  | DNA2     | PRR5L   |  |
| PDHA2    | IER5L      | ZNF322    |  | ALKBH1   | TRIM25  |  |
| GTPBP3   | RGS9       | SCARB1    |  | NSUN2    | SOWAHA  |  |
| MTHFD2L  | ANKS6      | GPR143    |  | NSUN3    | CHAC1   |  |

|         |           |         |  |        |          |  |
|---------|-----------|---------|--|--------|----------|--|
| COA8    | STEAP3    | MBTPS1  |  | SERAC1 | HOXA-AS2 |  |
| PPOX    | ZNF165    | UPK3B   |  | SPIRE1 | GZF1     |  |
| LDHD    | HSPG2     | MYO5B   |  | POLB   | LNCAROD  |  |
| MRPL45  | FRYL      | CCDC184 |  | ARMCX3 | LHFPL2   |  |
| IMMP1L  | SHLD1     | SAR1A   |  |        | GNAO1    |  |
| POLG    | GPR153    | SPON2   |  |        | FOXF2    |  |
| ATPAF1  | MSN       | EXOC2   |  |        | NTN1     |  |
| BLOC1S1 | IVNS1ABP  | PLCH2   |  |        | ITPRIPL2 |  |
| COX18   | OBSL1     | AKT2    |  |        | EGR3     |  |
| NDUFAF8 | BTN3A3    | SAV1    |  |        | FA2H     |  |
| ATP23   | SNAI2     | SLC39A8 |  |        | DENND6B  |  |
| DKAKD   | LAPTM5    | ARMCX4  |  |        | NRP2     |  |
| ATP5MF  | ACTB      | KIF13A  |  |        | IRS1     |  |
| SFXN3   | FAM50A    | ANXA10  |  |        | SRRM3    |  |
| AASS    | CTDSP1    | CHID1   |  |        | CLDN16   |  |
| DIABLO  | CAP1      | DNTTIP1 |  |        | DAGLA    |  |
| COX8C   | BTN2A2    | MPP1    |  |        | TFAP2C   |  |
| AGXT2   | MUC1      | NT5DC1  |  |        | RNF144B  |  |
| APOO    | SHE       | TEAD2   |  |        | NFKBIA   |  |
| ACAD11  | CAV1      | LDB1    |  |        | ADGRV1   |  |
| C5orf63 | SCNN1A    | CASZ1   |  |        | DNAH10   |  |
| HOGA1   | RRN3P1    | PCBD1   |  |        | HAS3     |  |
| TTC19   | ACTG1     | PTEN    |  |        | TLR6     |  |
| GCSH    | B3GALT5   | VAPB    |  |        | TMEM37   |  |
| TOMM6   | TRIM16    | MSANTD4 |  |        | HIP1R    |  |
| ABCB6   | CD40      | GPM6A   |  |        | GNE      |  |
| TST     | TRIP10    | NFKBIL1 |  |        | RNF152   |  |
| MT-CO1  | AMMECR1   | ZNF133  |  |        | CBR1     |  |
| SDR39U1 | MGAT3     | ZNF329  |  |        | CYP26B1  |  |
| DMGDH   | LINC02428 | DBN1    |  |        | ITGB4    |  |

|          |            |         |  |  |          |  |
|----------|------------|---------|--|--|----------|--|
| SLC25A14 | TXNDC16    | BRD7    |  |  | TBC1D10B |  |
| CHCHD5   | CYHR1      | NEFM    |  |  | CERS6    |  |
| FAHD1    | GIMAP8     | GJA3    |  |  | GYS1     |  |
| CYP27A1  | FNDC3A     | GLIPR2  |  |  | ITPKC    |  |
| MT-ND2   | STK17A     | FRK     |  |  | CASK     |  |
| MT-ND4   | PPP1R9B    | NATD1   |  |  | MUC20P1  |  |
| MT-ND5   | AGTRAP     | ZNF184  |  |  | PLCE1    |  |
| DELE1    | VWF        | ABT1    |  |  | FYN      |  |
| MRPS31   | NELL2      | TRPV6   |  |  | ATP2B4   |  |
| ALDH1L1  | MYL9       | PPDPF   |  |  | BARX2    |  |
| PTCD1    | HSPA1A     | TFDP1   |  |  | SBNO2    |  |
| TRIT1    | CTDSPL2    | ECM1    |  |  | ARL2BP   |  |
| SLC25A32 | PDCD6IP-DT | ZFP30   |  |  | SVIL     |  |
| EXOG     | RASSF3     | PTGFRN  |  |  | NR2F1    |  |
| CHCHD2   | MXI1       | PDLIM1  |  |  | SLC37A2  |  |
| KMO      | EPHB6      | UROS    |  |  | SDR42E1  |  |
| ELAC2    | DNAJB2     | C1QTNF6 |  |  | NRARP    |  |
| GPX1     | MBNL3      | PLCG2   |  |  | IGSF3    |  |
| CPT1B    | ATP6AP1    | RSPRY1  |  |  | TPBG     |  |
| PRELID1  | PEF1       | RIN1    |  |  | LMO7     |  |
| UCP3     | TACSTD2    | GSTM3   |  |  | ARHGEF37 |  |
| SLC25A27 | ABHD3      | LRRN2   |  |  | ARHGAP18 |  |
| HEMK1    | ALDH3B2    | GTPBP2  |  |  | TMCC3    |  |
| OMA1     | ASNS       | CSNK2B  |  |  | WARS1    |  |
| LETM2    | SDCBP      | FMNL1   |  |  | SLC22A23 |  |
| DHRS1    | SIRT7      | BMP7    |  |  | ALPG     |  |
| METTL5   | HTR2C      | SHROOM1 |  |  | LFNG     |  |
| MSRA     | TCEAL1     | AGRN    |  |  | ULBP1    |  |
| NUDT8    | FMR1       | GPNMB   |  |  | RAPGEF5  |  |
| SLC25A38 | C15orf39   | PDZD8   |  |  | B4GALNT1 |  |

|         |           |            |  |  |           |  |
|---------|-----------|------------|--|--|-----------|--|
| MPV17L2 | WRN       | HTR7       |  |  | C9orf72   |  |
| ACLY    | CYSTM1    | SGCE       |  |  | ITGAV     |  |
| ABCD2   | SNHG26    | SHOC2      |  |  | ARHGDIB   |  |
| LIPT1   | NMU       | ZNF212     |  |  | PHACTR2   |  |
| HMGCS2  | ASB1      | DTX2       |  |  | SERPINB6  |  |
| NDUFB4  | PTPRK     | CASD1      |  |  | PTPRR     |  |
| UQCR11  | UXS1      | BDKRB1     |  |  | PIP5K1A   |  |
| HTRA2   | REPS2     | PCLO       |  |  | PDCD6IP   |  |
| MT-CYB  | PARD6G    | FRAS1      |  |  | LAMB1     |  |
| AKR1B10 | DZIP3     | MGAT5      |  |  | DVL1      |  |
| PHYH    | PHLDA3    | DAPP1      |  |  | SEMA3A    |  |
| NDUFAF2 | SERPINB3  | ITGA6      |  |  | CENPN     |  |
| PARL    | DDIT4     | RASSF8-AS1 |  |  | DAPK2     |  |
| MRPL42  | LSP1      | TRUB1      |  |  | TLR1      |  |
| DNAJC4  | ATAD2     | VIM        |  |  | GDPD2     |  |
| PAM16   | IQANK1    | WSCD2      |  |  | LRATD2    |  |
| ALDH3A2 | GRAMD1C   | BAHCC1     |  |  | JPH2      |  |
| ACSL6   | WDR55     | BECN1      |  |  | SLC41A2   |  |
| ABHD10  | NOS1AP    | DUSP22     |  |  | ARHGDIA   |  |
| PXMP4   | RAG1      | TSPYL4     |  |  | KIFC2     |  |
| OSGEPL1 | LOXL4     | HLA-DRB6   |  |  | CLIP2     |  |
| NUDT2   | SOCS6     | MANCR      |  |  | PREP      |  |
| CYB5B   | THBS1     | TRIM38     |  |  | GALNT3    |  |
| MRPS18B | THAP9-AS1 | EPHA1      |  |  | ATP6V0D1  |  |
| RFK     | SEPTIN9   | MCM9       |  |  | SERPINB13 |  |
| MT-ATP8 | LYZ       | PRDM5      |  |  | CDKL1     |  |
| TIMMDC1 | PIK3CA    | GDI2       |  |  | ELAVL2    |  |
| SPATA19 | RETSAT    | SGPP2      |  |  | ANKRD13A  |  |
| AKR7A2  | ADSS2     | SLC9A9     |  |  | VSNL1     |  |
| DUT     | CFAP20DC  | RAPGEF4    |  |  | EMB       |  |

|           |           |           |  |  |         |  |
|-----------|-----------|-----------|--|--|---------|--|
| DHRS7B    | GLCE      | ITGAX     |  |  | SH3TC2  |  |
| NT5M      | PARP14    | TMX4      |  |  | ARL14   |  |
| RHOT1     | APH1B     | LANCL3    |  |  | MMP14   |  |
| MTHFS     | MICALL2   | WIPF1     |  |  | MIER3   |  |
| ADCK1     | PAPSS2    | LINC00958 |  |  | PIM1    |  |
| NIPSNAP1  | HPGD      | IL12RB2   |  |  | ACER3   |  |
| ACSM2A    | LINC02028 | ATP6V0E2  |  |  | EDAR    |  |
| SLC25A33  | ZBTB7C    | GINM1     |  |  | ITCH    |  |
| LYRM9     | TMEM204   | DNAH2     |  |  | ATP9A   |  |
| RAB24     | KIF11     | TNKS1BP1  |  |  | CLGN    |  |
| PARS2     | IARS1     | LINC02518 |  |  | INHBB   |  |
| MRPL52    | ENDOD1    | NAE1      |  |  | KDSR    |  |
| PUS1      | TACC1     | EHD3      |  |  | PTK2B   |  |
| PGS1      | LTBR      | GTF2IP4   |  |  | RBM18   |  |
| TMEM205   | TRIM34    | CERS4     |  |  | JAG1    |  |
| SLC25A53  | CORO1B    | ANXA7     |  |  | RBCK1   |  |
| MTFP1     | LSM7      | GALNT11   |  |  | TMC6    |  |
| COA4      | FZD5      | SYBU      |  |  | VILL    |  |
| NIF3L1    | CLOCK     | PPIL4     |  |  | PGM2L1  |  |
| PUSL1     | MINDY2    | CERNA2    |  |  | LAD1    |  |
| SDSL      | HLA-E     | AFG3L1P   |  |  | PRUNE2  |  |
| SUGCT     | CDK2AP2   | APOL2     |  |  | ARL8B   |  |
| NRDC      | ADO       | MCTP1     |  |  | BMP1    |  |
| TMEM126B  | CDC14B    | ANO4      |  |  | TRAF7   |  |
| ACSS3     | H3C6      | TTC26     |  |  | MIR22HG |  |
| RBFA      | ALPK1     | ZNF527    |  |  | HAS2    |  |
| NIPSNAP3A | GSTP1     | ZFAND3    |  |  | KITLG   |  |
| MTARC1    | EML2-AS1  | EIF4A3    |  |  | FBXO32  |  |
| FUNDC1    | SAMD9     | CDS2      |  |  | ANKH    |  |
| CBR3      | MBNL1     | WASHC2A   |  |  | ZFYVE1  |  |

|          |           |           |  |  |           |  |
|----------|-----------|-----------|--|--|-----------|--|
| MTERF4   | PDS5B     | C6orf47   |  |  | IL1RN     |  |
| NUDT19   | PHLPP1    | DPY19L2P2 |  |  | IGSF1     |  |
| HEBP1    | TRABD     | SLC6A11   |  |  | RHBDL2    |  |
| DTYMK    | MTR       | RNASET2   |  |  | DTNB      |  |
| STAR     | LINC00920 | PPA1      |  |  | IGFBP6    |  |
| DNAJC19  | TUFT1     | COL4A5    |  |  | RASSF5    |  |
| OTC      | PPP1CA    | TPD52L1   |  |  | LGI3      |  |
| COX7A2L  | PPP2R2D   | NUP93     |  |  | HERC5     |  |
| MTERF3   | CKAP2L    | RNF146    |  |  | MOSMO     |  |
| TMEM177  | FAM111B   | TUBB      |  |  | TMEM125   |  |
| FDPS     | C2CD5     | FOXP4     |  |  | SYT12     |  |
| IDI1     | CRISPLD2  | LIMS2     |  |  | NAPB      |  |
| TOP3A    | CDKN1A    | NRN1      |  |  | LINC01226 |  |
| FTMT     | FSCN1     | CPA4      |  |  | ADAMTS16  |  |
| LDHAL6B  | FAM83H    | DCHS2     |  |  | ERLIN1    |  |
| MTFR1    | NINJ1     | RNF144A   |  |  | SDC1      |  |
| MMADHC   | IGFL2-AS1 | SMAP1     |  |  | PKP3      |  |
| TSTD1    | PPFIBP1   | CYP4F12   |  |  | PHLDA2    |  |
| OSBPL1A  | HELB      | CDK19     |  |  | PTPRZ1    |  |
| RECQL4   | MPP2      | RCSD1     |  |  | ITGBL1    |  |
| GLYAT    | TP53      | NHLH2     |  |  | MTSS1     |  |
| COQ8B    | ERCC6L    | DLC1      |  |  | SPATS2L   |  |
| GTPBP10  | ARHGAP1   | NPM3      |  |  | PSCA      |  |
| TRMT1    | RNF139    | PRSS16    |  |  | SH2D4A    |  |
| TSTD3    | PDE5A     | SGPP1     |  |  | TYMP      |  |
| MRPS36   | ZCCHC17   | ANXA9     |  |  | APOD      |  |
| SLC25A48 | SLC29A3   | EDNRA     |  |  | TSPAN6    |  |
| SLC25A47 | DENND3    | CDR2L     |  |  | KLHDC8B   |  |
| SLC25A41 | POLA1     | DXO       |  |  | RPS6KA4   |  |
| SLC25A34 | IFNAR1    | MFAP2     |  |  | GART      |  |

|         |           |           |  |  |           |  |
|---------|-----------|-----------|--|--|-----------|--|
| SOD1    | RASA1     | SATB1-AS1 |  |  | PTPRU     |  |
| SERHL2  | DHRS7     | LAMP1     |  |  | CD151     |  |
| CHCHD6  | TFDP2     | NEK10     |  |  | EPB41L4A  |  |
| PIF1    | SMPDL3B   | ACD       |  |  | DPYD      |  |
| FABP1   | ST3GAL5   | ARF6      |  |  | NEBL      |  |
| PLPBP   | RAP1GAP2  | NQO2      |  |  | PPARGC1B  |  |
| PNPT1   | CNTRL     | ZNF91     |  |  | PRKACB    |  |
| ABCA9   | ESCO2     | HCG11     |  |  | RAB11FIP1 |  |
| SCP2    | C4orf3    | ERG28     |  |  | FZD3      |  |
| NT5DC3  | GNAQ      | HLA-K     |  |  | KRT6A     |  |
| CMC4    | IKBKG     | SLC6A10P  |  |  | UBL4A     |  |
| AGMAT   | TNFRSF1A  | STARD9    |  |  | ADORA2B   |  |
| CMPK2   | ZFP36L1   | CD99L2    |  |  | COL7A1    |  |
| MFF     | RHPN2     | MAPK11    |  |  | PRRG4     |  |
| DCXR    | NUP160    | IL6R      |  |  | NRG2      |  |
| AMACR   | PKN2      | COG4      |  |  | JPH1      |  |
| NUDT6   | LINC02614 | ACTN1     |  |  | ACTR3C    |  |
| DMAC2   | TMEM229B  | OASL      |  |  | AUNIP     |  |
| MRM2    | ELF3-AS1  | CSTA      |  |  | CXCL11    |  |
| DHODH   | ITGB2-AS1 | PDGFC     |  |  | PLCD4     |  |
| MRPL48  | ZNF341    | DENND11   |  |  | SAMD9L    |  |
| AGXT    | PIGR      | HDAC2     |  |  | HLA-DMA   |  |
| MICU3   | G2E3-AS1  | FAM8A1    |  |  | TCEA2     |  |
| CYP11A1 | FRMD4B    | ZNF577    |  |  | CSNK1E    |  |
| SMIM20  | EGR2      | SUSD5     |  |  | APP       |  |
| RPUSD4  | MICAL1    | CTNNB1    |  |  | LPGAT1    |  |
| NME6    | UBE2J2    | TMEM170B  |  |  | CAST      |  |
| ACSM4   | CCDC92    | OARD1     |  |  | KDM1B     |  |
| NLRX1   | AAK1      | ERBB3     |  |  | SCIN      |  |
| FOXRED1 | CD2BP2    | CITED4    |  |  | FUT8      |  |



|           |           |          |  |  |          |  |
|-----------|-----------|----------|--|--|----------|--|
| TFB2M     | TPRG1L    | KCNG1    |  |  | FLII     |  |
| ATP5MC2   | RNF19B    | CLDND1   |  |  | CDH23    |  |
| MT-ND1    | PRIM1     | PSMG4    |  |  | DCBLD2   |  |
| NIPSNAP3B | RHBDF2    | FSTL4    |  |  | TJP1     |  |
| SLC25A6   | KCNC4     | SAYSD1   |  |  | EDARADD  |  |
| SLC25A52  | LCN2      | DNM1     |  |  | EHD4     |  |
| ACOD1     | TLR5      | ZSCAN20  |  |  | GMDS     |  |
| QTRT1     | MUC20-OT1 | E2F3     |  |  | CYP2B6   |  |
| ATP5MD    | NR6A1     | FBXO41   |  |  | PCDH1    |  |
| PET117    | RRAGA     | INPP5F   |  |  | IL20RA   |  |
| C15orf61  | RNF7      | BCL11B   |  |  | C18orf25 |  |
| IFI27     | LAMP3     | ERG      |  |  | PLCB1    |  |
| CRYZ      | SLC10A3   | ARGLU1   |  |  | WDR48    |  |
| PYCR1     | PLS1      | GNAS     |  |  | B3GNT5   |  |
| YRDC      | BIRC3     | LIMD1    |  |  | S100A6   |  |
| FASTKD5   | RUNX1     | USF2     |  |  | ANTXR1   |  |
| COA1      | DLG1      | TSPAN12  |  |  | S100P    |  |
| COX7B2    | ERFE      | RNF8     |  |  | PLA2G4A  |  |
| MT-ND4L   | MPG       | CTSA     |  |  | CEMIP    |  |
| SIRT4     | OSR1      | ZNF273   |  |  | GOT1     |  |
| USP30     | PRPS1     | EDC4     |  |  | ADGRG6   |  |
| NOCT      | GEN1      | DOCK11   |  |  | ANKRD10  |  |
| CA5A      | ACER2     | SEZ6L2   |  |  | SLC48A1  |  |
| TRUB2     | RUSC1     | CANX     |  |  | USP14    |  |
| C3orf33   | DTX3L     | RAB40B   |  |  | ADAMTSL4 |  |
| GLUD2     | KL        | SIMC1    |  |  | PPAT     |  |
| HPDL      | EPPK1     | PRICKLE3 |  |  | SHC1     |  |
| ANGEL2    | ZNF620    | EMC10    |  |  | IL4R     |  |
| ANTKMT    | ADIRF     | SNHG32   |  |  | RAI14    |  |
| UQCC3     | LPCAT4    | ZNF649   |  |  | TTC7A    |  |

|              |          |          |  |  |           |  |
|--------------|----------|----------|--|--|-----------|--|
| PRDX4        | BIN3     | ITSN1    |  |  | AMFR      |  |
| PAICS        | PYGL     | BRINP3   |  |  | NT5C2     |  |
| MGARP        | FEM1B    | HLA-DQB2 |  |  | CNR1      |  |
| HDHD3        | SKA3     | ZNF613   |  |  | AHR       |  |
| CYP11B2      | BEX3     | GBA2     |  |  | KPNA7     |  |
| RCC1L        | IQSEC3   | PRRG1    |  |  | H2AC6     |  |
| FAM185A      | RGS16    | MAP1A    |  |  | SKA2      |  |
| POLG2        | RHOV     | SUV39H2  |  |  | NDC80     |  |
| MTFR2        | FOXJ2    | SETD4    |  |  | THSD1     |  |
| GPX4         | SERPINB7 | ZC3HAV1  |  |  | WFDC3     |  |
| TOMM20L      | RABEP2   | FOXO4    |  |  | CASTOR3   |  |
| COMT         | BRCA2    | RSPH3    |  |  | CD46      |  |
| MYG1         | STON1    | CMYA5    |  |  | MTHFD1    |  |
| OXCT2        | KIF21B   | HBP1     |  |  | OSCP1     |  |
| CCDC127      | RPS6KA3  | CRYBG1   |  |  | LINC00511 |  |
| CRY1         | CDCA2    | DIP2C    |  |  | SLC18B1   |  |
| ACSM2B       | NSDHL    | RNF223   |  |  | CD63      |  |
| EFHD1        | PGLYRP4  | TMEM242  |  |  | SYNPO     |  |
| RAB5IF       | HOXA1    | POLR1H   |  |  | LIFR      |  |
| DMAC1        | NDC1     | GID8     |  |  | NGFR      |  |
| NEU4         | H2BC12   | MT-TT    |  |  | FUCA2     |  |
| CASP9        | OTUD4    | TRHDE    |  |  | NECTIN1   |  |
| MCL1         | PAQR7    | JDP2     |  |  | HPS5      |  |
| PLD6         | GNS      | KIF21A   |  |  | LINC02057 |  |
| TOMM34       | SDF2L1   | AGAP9    |  |  | HMGN1     |  |
| PRORP        | NPTXR    | RASIP1   |  |  | TAF4B     |  |
| PLSCR3       | BLM      | KLF8     |  |  | FRMPD3    |  |
| ATP5MF-PTCD1 | ADGRF4   | SELENOH  |  |  | TNFRSF9   |  |
| GOLPH3       | CALR     | PPM1A    |  |  | GALNT2    |  |
| FASTKD3      | ZBTB44   | SYT16    |  |  | TGFA      |  |

|         |           |           |  |  |         |  |
|---------|-----------|-----------|--|--|---------|--|
| GPAT2   | GEMIN5    | EMP3      |  |  | CMTM4   |  |
| NBR1    | GNA13     | LUC7L2    |  |  | TMCO4   |  |
| SETD9   | FAM120AOS | FZD1      |  |  | ALDH1A1 |  |
| CYP11B1 | TCEAL4    | ZNF391    |  |  | AGPAT1  |  |
| CSKMT   | VPS28     | TMEM30B   |  |  | INAFM2  |  |
| MIGA1   | CCDC120   | GALC      |  |  | IVL     |  |
| RPIA    | KCNK7     | PCNA      |  |  | SGMS1   |  |
| BBC3    | HRAS      | UFM1      |  |  | H1-2    |  |
| BCL2    | ANTXR2    | SPEF1     |  |  | DDX5    |  |
| BCL2A1  | MTF2      | ZNF573    |  |  | KIRREL1 |  |
| CASP3   | NCAPH     | MAF1      |  |  | IFI16   |  |
| MT-ND6  | C6orf141  | PLPP2     |  |  | SEMA6D  |  |
| PRKN    | GPR161    | FABP5     |  |  | KCNH4   |  |
| PICK1   | FNTA      | SBF2-AS1  |  |  | CEMIP2  |  |
| BCL2L10 | MAP3K1    | ARID4A    |  |  | PODXL   |  |
| AKAP10  | CNTNAP3   | C4orf19   |  |  | TBCB    |  |
| ADCY10  | GPD1L     | PDZK1IP1  |  |  | RBBP8   |  |
| PABPC5  | NUP205    | MBTPS2    |  |  | GLMP    |  |
| PRSS35  | PSMD2     | CENPT     |  |  | FUT2    |  |
| PRIMPOL | SP1       | FZD8      |  |  | OTULIN  |  |
| TRMT61B | PRR5      | CPEB4     |  |  | NUB1    |  |
| PDE2A   | CARD11    | ARHGEF10L |  |  | FHDC1   |  |
| PLGRKT  | ARPC1A    | ANXA3     |  |  | CYP26A1 |  |
| ETFBKMT | EMP2      | CUL7      |  |  | PLLP    |  |
| RTL10   | RAC3      | LINC01322 |  |  | CUTA    |  |
| C2orf69 | SMC2      | KLF13     |  |  | BRD3OS  |  |
| ARMCX2  | BPGM      | CCNB2     |  |  | PLEKHA1 |  |
| ARMCX1  | ARSA      | CRNDE     |  |  | AGAP3   |  |
| SNAP29  | LEPROT    | GPC1      |  |  | PRECSIT |  |
| METTL4  | TIMP1     | KNSTRN    |  |  | NDRG4   |  |

|               |          |            |  |  |          |  |
|---------------|----------|------------|--|--|----------|--|
| SPHKAP        | EPRS1    | IFFO2      |  |  | PSMC4    |  |
| NAT8L         | SLC22A5  | PTK6       |  |  | GPX8     |  |
| MCCD1         | MAP1LC3B | SDHAP3     |  |  | IFIT2    |  |
| PIGBOS1       | FBXO2    | PALM2AKAP2 |  |  | METTTL7A |  |
| HTD2          | PPP4C    | SLC22A15   |  |  | ARHGAP42 |  |
| RP11_469A15.2 | NCEH1    | ANXA6      |  |  | ANXA4    |  |
|               | CSNK1G2  | MORC3      |  |  | PRSS3    |  |
|               | STMP1    | KIT        |  |  | EFNB1    |  |
|               | RTTN     | VPS9D1     |  |  | CCDC33   |  |
|               | PRKD3    | TAF8       |  |  | FN1      |  |
|               | LAMA5    | FAM149A    |  |  | TFE3     |  |
|               | TMEM250  | GNG11      |  |  | SOWAHB   |  |
|               | MLXIP    | CCNY       |  |  | IL6ST    |  |
|               | ANKRD28  | IFITM2     |  |  | LPCAT2   |  |
|               | C2orf27A | CACNG4     |  |  | HMOX1    |  |
|               | TARDBP   | IL11RA     |  |  | REPIN1   |  |
|               | LMNA     | CDCA8      |  |  | CYSRT1   |  |
|               | MYL6     | RBBP9      |  |  | SLC27A5  |  |
|               | PEBP1    | IRX1       |  |  | ZSCAN31  |  |
|               | BACH1    | FAM30A     |  |  | CACUL1   |  |
|               | ZBED3    | TMCO3      |  |  | SPIN4    |  |
|               | PLIN3    | ZNF266     |  |  | PYROXD2  |  |
|               | MITF     | ADAM17     |  |  | ITPK1    |  |
|               | DNMBP    | CEP170B    |  |  | GNB1     |  |
|               | RASAL2   | NTNG1      |  |  | CD82     |  |
|               | DCLRE1B  | TCAF1      |  |  | ADAMTS20 |  |
|               | IRAK1    | KHNYN      |  |  | APOL3    |  |
|               | LRRFIP1  | ZG16B      |  |  | MID1     |  |
|               | BCAT1    | CAMSAP3    |  |  | TMEM154  |  |
|               | SMCHD1   | GLI3       |  |  | SPATA2L  |  |

|  |          |           |  |  |         |  |
|--|----------|-----------|--|--|---------|--|
|  | MCTP2    | PARVB     |  |  | RHBDF1  |  |
|  | OS9      | MGMT      |  |  | PKP4    |  |
|  | PSD3     | MYH10     |  |  | MED15   |  |
|  | TLCD1    | CCNC      |  |  | RAB7A   |  |
|  | PLEKHA2  | TMEM38B   |  |  | ITGA3   |  |
|  | GNB5     | PRKCQ-AS1 |  |  | ATP13A3 |  |
|  | CTDP1    | PPIL6     |  |  | RRAS    |  |
|  | MTREX    | ZNF431    |  |  | ESR1    |  |
|  | WDR36    | PODXL2    |  |  | KCNK1   |  |
|  | RTL8C    | DCAF11    |  |  | INSIG2  |  |
|  | AMER1    | NFE2L2    |  |  | WNT2B   |  |
|  | SDAD1    | TOR4A     |  |  | NHS     |  |
|  | CXCL16   | SEC63     |  |  | CADM1   |  |
|  | MOB3A    | CTCF      |  |  | ANK3    |  |
|  | MYL12B   | CEP57     |  |  | HECA    |  |
|  | POLD2P1  | CHN1      |  |  | TMED10  |  |
|  | SELENOM  | RBL2      |  |  | IRX2    |  |
|  | ROM1     | TWSG1     |  |  | CDH1    |  |
|  | PIEZO2   | LDLRAD3   |  |  | CORO2A  |  |
|  | CNNM3    | PGPEP1    |  |  | B3GNT9  |  |
|  | RHCE     | CEP112    |  |  | SYDE2   |  |
|  | GCC2     | TWIST1    |  |  | TMPO    |  |
|  | ADAM23   | STMN1     |  |  | TUBB4B  |  |
|  | IPO7     | DNAJA2    |  |  | DDB2    |  |
|  | PPP1R13B | LTBP2     |  |  | SRPK1   |  |
|  | RNF149   | C1orf74   |  |  | UCN2    |  |
|  | NCOA7    | SMIM13    |  |  | PFKFB4  |  |
|  | B3GAT3   | ADCY3     |  |  | TGFBI   |  |
|  | NOD1     | TRIM24    |  |  | GGT6    |  |
|  | CDK6     | GABRQ     |  |  | KCNJ15  |  |

|  |           |            |  |  |           |  |
|--|-----------|------------|--|--|-----------|--|
|  | NUDT22    | GDPD5      |  |  | OLMALINC  |  |
|  | FAM102A   | GLO1       |  |  | CAB39     |  |
|  | KRT3      | ASPHD1     |  |  | TXNDC11   |  |
|  | NUP62CL   | PRPF4B     |  |  | TMEM132A  |  |
|  | NUP210    | RIOK1      |  |  | MISP      |  |
|  | CTSB      | FBXO25     |  |  | CYP1B1    |  |
|  | HYAL1     | ARL15      |  |  | ABI3BP    |  |
|  | MED18     | TOX4       |  |  | MYEOV     |  |
|  | ELK4      | BTG1       |  |  | OAF       |  |
|  | GNB2      | RTL8B      |  |  | SP3       |  |
|  | CCDC121   | AP3B1      |  |  | LINC02542 |  |
|  | TNFAIP8L3 | HMGN4      |  |  | RRP36     |  |
|  | YBX3      | VAR51      |  |  | C5orf66   |  |
|  | GPRC5C    | XRN2       |  |  | FMO4      |  |
|  | CRCP      | PBX3       |  |  | CYB5R2    |  |
|  | PPP1R18   | PKIA       |  |  | MYO5C     |  |
|  | ANKMY1    | PCED1A     |  |  | TUBA1A    |  |
|  | HRCT1     | TTC39A     |  |  | KLK5      |  |
|  | NCOA3     | PEAK1      |  |  | CDH3      |  |
|  | ADAMTS1   | LIG4       |  |  | TMEM50A   |  |
|  | JPT2      | PFKFB2     |  |  | WLS       |  |
|  | PRKAG3    | PCNX4      |  |  | NAMPT     |  |
|  | CARD16    | LY6D       |  |  | PPFIBP2   |  |
|  | LIPE      | RHOG       |  |  | S100A2    |  |
|  | CCNB1IP1  | ADAMTS12   |  |  | DNAH3     |  |
|  | STK25     | RIPK3      |  |  | KCTD20    |  |
|  | SLC4A3    | CTAG2      |  |  | LCA5      |  |
|  | IER2      | HNRNPR     |  |  | ANKDD1A   |  |
|  | PALB2     | TMEM184B   |  |  | TMEM156   |  |
|  | PCBP4     | NUTM2A-AS1 |  |  | FAH       |  |

|  |            |           |  |  |           |  |
|--|------------|-----------|--|--|-----------|--|
|  | TNFSF14    | WASHC3    |  |  | TMEM184A  |  |
|  | NOTCH2     | SLCO3A1   |  |  | ACTR3     |  |
|  | ARMH4      | POPDC3    |  |  | PCGF5     |  |
|  | CSRP1      | KRT13     |  |  | CASP1     |  |
|  | SEC14L1    | LRRC8D    |  |  | DNER      |  |
|  | ZNF589     | PLXNB1    |  |  | CYP2T1P   |  |
|  | TAGLN2     | AKIRIN2   |  |  | PHF23     |  |
|  | TRIM31-AS1 | EREG      |  |  | FAXDC2    |  |
|  | SMAGP      | PARP2     |  |  | IKBKE     |  |
|  | CEP68      | ATN1      |  |  | LRP4      |  |
|  | HEATR1     | ZDHHC5    |  |  | ERF       |  |
|  | VRK3       | ZNF350    |  |  | TNC       |  |
|  | SECTM1     | HAUS5     |  |  | CFHR3     |  |
|  | PSAT1      | DTNBP1    |  |  | ZCCHC4    |  |
|  | C19orf12   | PTGS2     |  |  | APAF1     |  |
|  | SLC12A2    | HSPH1     |  |  | FAM83A    |  |
|  | APPL1      | LINC01224 |  |  | RNASEL    |  |
|  | IL17RD     | MMP15     |  |  | ZNRF1     |  |
|  | KIF3AP1    | CDCA7     |  |  | LIMK2     |  |
|  | H2AW       | STK35     |  |  | AGR2      |  |
|  | GNG12      | PCYT1B    |  |  | SUPT5H    |  |
|  | LNCOC1     | SNHG8     |  |  | CYP27C1   |  |
|  | ALDH3A1    | BEX2      |  |  | SLC9A2    |  |
|  | SERTAD1    | ADM2      |  |  | ATP6V0D2  |  |
|  | LIMS1      | XAB2      |  |  | LPCAT3    |  |
|  | HMSD       | RELL2     |  |  | THEM6     |  |
|  | KIAA1671   | ZKSCAN8   |  |  | C14orf132 |  |
|  | NLE1       | PDGFB     |  |  | SEPHS2    |  |
|  | B9D1       | RNF128    |  |  | GATA3     |  |
|  | TRIM29     | SMAD7     |  |  | TTK       |  |

|  |           |           |  |  |             |  |
|--|-----------|-----------|--|--|-------------|--|
|  | DNAJB1    | FAAP100   |  |  | MYOF        |  |
|  | BUB1      | RAB26     |  |  | DLGAP1-AS1  |  |
|  | CORO6     | NBL1      |  |  | BARX1       |  |
|  | FOXA1     | DHX38     |  |  | DLG3        |  |
|  | CEBPA     | SLC38A7   |  |  | LYPD3       |  |
|  | LY6E      | TMEM255A  |  |  | EPS8        |  |
|  | POMGNT1   | SLC39A6   |  |  | SYTL4       |  |
|  | SMPD1     | MAP3K4    |  |  | SERPINH1    |  |
|  | CAPN8     | MARK1     |  |  | IER3        |  |
|  | TP53I3    | TM9SF3    |  |  | MCM3        |  |
|  | EXTL2     | FBH1      |  |  | SLC52A3     |  |
|  | AP1S1     | RASSF9    |  |  | TP73        |  |
|  | LINC02029 | PARD3     |  |  | MMP7        |  |
|  | CA2       | SPCS3     |  |  | MAP7D1      |  |
|  | CTNNAL1   | ZNF33B    |  |  | AHCYL2      |  |
|  | SLC12A7   | IRF3      |  |  | CTH         |  |
|  | MAPK3     | LINC00294 |  |  | ARHGAP26    |  |
|  | KREMEN1   | ST3GAL2   |  |  | SH3D21      |  |
|  | UROD      | STK19     |  |  | LINC01589   |  |
|  | TXLNG     | SPINT2    |  |  | C20orf194   |  |
|  | ZNF84     | HMGN3     |  |  | DNAJB6      |  |
|  | PLXNA3    | GMNN      |  |  | UHRF1BP1    |  |
|  | PKM       | MCM3AP    |  |  | SHROOM3     |  |
|  | INO80     | CERCAM    |  |  | C1orf226    |  |
|  | RMND5B    | MACROH2A1 |  |  | MIR4435-2HG |  |
|  | CDC42BPA  | WDR19     |  |  | DMTN        |  |
|  | BRCA1     | RADX      |  |  | PPARD       |  |
|  | GPR37L1   | EEF2K     |  |  | TRPV4       |  |
|  | SPTLC3    | TUSC1     |  |  | IL1A        |  |
|  | ZNF551    | DNAJC9    |  |  | GCLM        |  |



|  |           |          |  |  |            |  |
|--|-----------|----------|--|--|------------|--|
|  | DTL       | BMP2     |  |  | PLBD1      |  |
|  | C1orf198  | TCP1     |  |  | SLC35A4    |  |
|  | IPO5      | SLC30A1  |  |  | FNBP1      |  |
|  | CARHSP1   | ZNF71    |  |  | KANK2      |  |
|  | PDE4DIP   | WEE2-AS1 |  |  | RNF141     |  |
|  | MAML2     | CSRNP3   |  |  | CRISPLD1   |  |
|  | TNFRSF12A | PRMT2    |  |  | TRIB1      |  |
|  | COL6A4P1  | ZNF256   |  |  | PITPNM2    |  |
|  | ATR       | CSNK2A1  |  |  | ADAMTSL5   |  |
|  | PRKAR1B   | IGFBP2   |  |  | TCF7L2     |  |
|  | TAF1A     | MMP2     |  |  | PPT2-EGFL8 |  |
|  | BIN1      | ADGRE2   |  |  | FHOD3      |  |
|  | HIC2      | TRIQQ    |  |  | INPP1      |  |
|  | HK2       | VTA1     |  |  | LINC00881  |  |
|  | PCGF1     | ABCF2    |  |  | PROM2      |  |
|  | ANAPC1    | RHOQ     |  |  | KRT18      |  |
|  | TLE5      | RASA3    |  |  | CD9        |  |
|  | HAS2-AS1  | ASB13    |  |  | CASP10     |  |
|  | CBFA2T2   | RAP1B    |  |  | SORBS1     |  |
|  | NFKBIZ    | MAP3K3   |  |  | PFKFB3     |  |
|  | ADGRA3    | TDP1     |  |  | SIK1B      |  |
|  | AMBRA1    | FILIP1L  |  |  | MIPOL1     |  |
|  | SORD      | TXNIP    |  |  | TAPBP      |  |
|  | LINC02893 | LRP10    |  |  | AMOTL1     |  |
|  | GDPD3     | PLA2G15  |  |  | GABARAPL1  |  |
|  | NSD3      | ZNF813   |  |  | KRT16P6    |  |
|  | NLRP7     | PPIL1    |  |  | CD74       |  |
|  | RMI2      | JMJD1C   |  |  | SCOC       |  |
|  | DTX3      | ZNF559   |  |  | GPR39      |  |
|  | DENND2A   | ZNF525   |  |  | HSPA8      |  |

|  |          |           |  |  |          |  |
|--|----------|-----------|--|--|----------|--|
|  | JAG2     | CRNKL1    |  |  | RFWD3    |  |
|  | MDN1     | DOCK8-AS1 |  |  | VPS35    |  |
|  | FLG      | ZNF117    |  |  | SLC22A18 |  |
|  | LARS1    | CCNL2     |  |  | MFSD6    |  |
|  | HNRNPH1  | GLE1      |  |  | DNAJC10  |  |
|  | DNAJC8   | HMCN1     |  |  | HLTF     |  |
|  | RIOK3    | RECK      |  |  | ACKR3    |  |
|  | FAM83B   | H19       |  |  | TSHZ1    |  |
|  | ZBTB34   | UBA2      |  |  | S100A9   |  |
|  | MANEA    | SLC17A5   |  |  | PNMA1    |  |
|  | AP2B1    | ATP7B     |  |  | KIF23    |  |
|  | FAM111A  | ZBTB12    |  |  | IQSEC2   |  |
|  | INTS6    | PER1      |  |  | HLA-DMB  |  |
|  | KIFAP3   | ERMAP     |  |  | ERLIN2   |  |
|  | BCAS4    | NFE2L1    |  |  | MORF4L2  |  |
|  | NOL4L    | PPP2R5E   |  |  | SQSTM1   |  |
|  | MAP2K2   | EIF4G3    |  |  | TGFBR3   |  |
|  | MLLT6    | NOM1      |  |  | MANF     |  |
|  | ADAM15   | ZNF383    |  |  | HNRNPK   |  |
|  | CCDC80   | PAX5      |  |  | ARL4D    |  |
|  | HLA-F    | SNRNP48   |  |  | TMC1     |  |
|  | GSAP     | TRIM52    |  |  | CCDC6    |  |
|  | CAND1    | PCDH10    |  |  | PPM1L    |  |
|  | CLTA     | KLHDC4    |  |  | VAT1     |  |
|  | GBP1P1   | WIP1      |  |  | EPCAM    |  |
|  | PTPDC1   | GCHFR     |  |  | CDH5     |  |
|  | KIF4A    | LSM2      |  |  | LBR      |  |
|  | TOR1AIP2 | OR7E14P   |  |  | XDH      |  |
|  | HPCAL1   | ZKSCAN3   |  |  | CCDC47   |  |
|  | SRA1     | KCNJ2     |  |  | CALCRL   |  |

|  |           |            |  |  |           |  |
|--|-----------|------------|--|--|-----------|--|
|  | SERINC5   | SOX4       |  |  | EYA2      |  |
|  | TGFB11    | TMEM192    |  |  | CAPZB     |  |
|  | ADH1C     | APCDD1L-DT |  |  | CASP4     |  |
|  | H2BC5     | CTBP2      |  |  | DEDD2     |  |
|  | WDR61     | CFD        |  |  | STC2      |  |
|  | MPRIP     | CNTLN      |  |  | CRELD2    |  |
|  | ABCC3     | FOXO3      |  |  | TANC2     |  |
|  | RNF19A    | NKX2-8     |  |  | SGMS2     |  |
|  | CALHM2    | ZNF799     |  |  | LGALS1    |  |
|  | RNF185    | MAPK12     |  |  | CTTNBP2NL |  |
|  | MIS18BP1  | ZBTB2      |  |  | SSR3      |  |
|  | IFIT3     | UBN2       |  |  | WNK2      |  |
|  | GBP7      | PAXIP1-DT  |  |  | MEGF6     |  |
|  | EPHB2     | KIFBP      |  |  | OGFOD1    |  |
|  | BTG3      | RHEB       |  |  | TTC27     |  |
|  | VEGFB     | GLB1L2     |  |  | GCNT4     |  |
|  | OR13A1    | THAP11     |  |  | PRR15     |  |
|  | CCP110    | CSTF2T     |  |  | DUSP7     |  |
|  | CYP3A4    | SKIL       |  |  | APLP2     |  |
|  | PSMA6     | ZSCAN26    |  |  | PAQR6     |  |
|  | FBXL14    | KCTD12     |  |  | CFH       |  |
|  | ARHGAP8   | TMEM45B    |  |  | ZYX       |  |
|  | RALB      | PGAP4      |  |  | EMD       |  |
|  | SRSF9     | PCMTD2     |  |  | WDR82     |  |
|  | PXK       | PFDN6      |  |  | APOBEC3C  |  |
|  | CLCN7     | NAA40      |  |  | PXN       |  |
|  | UBE2G1    | TYSND1     |  |  | SH3BGRL3  |  |
|  | RAP2C     | CMAS       |  |  | ENC1      |  |
|  | RBM26-AS1 | UBE3C      |  |  | GABRA3    |  |
|  | FLG-AS1   | DYNC2I2    |  |  | IL13RA1   |  |

|  |          |          |  |  |           |  |
|--|----------|----------|--|--|-----------|--|
|  | ARL6IP5  | DHCR24   |  |  | ADGRB2    |  |
|  | MID1IP1  | PIDD1    |  |  | PRNP      |  |
|  | IPPK     | METTL27  |  |  | SEMA4D    |  |
|  | RB1CC1   | ESPN     |  |  | WDR12     |  |
|  | TMEM51   | ZC3H18   |  |  | MAN2A1    |  |
|  | CEACAM1  | GJB7     |  |  | XRCC2     |  |
|  | ARFGEF1  | ARHGEF5  |  |  | DCLRE1C   |  |
|  | WDR1     | RAB29    |  |  | MKNK2     |  |
|  | PARPBP   | DDX27    |  |  | MILR1     |  |
|  | SURF4    | CNTNAP2  |  |  | NR2F1-AS1 |  |
|  | SCARA3   | BTBD9    |  |  | CLCN3P1   |  |
|  | S100A3   | CCNA2    |  |  | PTCH1     |  |
|  | HNRNPH2  | SLC35B3  |  |  | CNOT4     |  |
|  | FND3B    | VASN     |  |  | SMAD6     |  |
|  | FANCD2   | PID1     |  |  | TNFRSF25  |  |
|  | ROGDI    | TMEM254  |  |  | DNAJC5    |  |
|  | ANKIB1   | SHISA5   |  |  | EGLN2     |  |
|  | FIGNL1   | GPANK1   |  |  | ARL5B     |  |
|  | NRG4     | WDR59    |  |  | RAB3D     |  |
|  | TMEM41B  | CDKL2    |  |  | GAL3ST4   |  |
|  | DESI2    | THBS2    |  |  | CORO1C    |  |
|  | ASAP2    | KCNQ1OT1 |  |  | VNN1      |  |
|  | SLC9A3R2 | PDLIM2   |  |  | ALDH3B1   |  |
|  | BCL2L14  | F8       |  |  | MGAT4A    |  |
|  | NBN      | PKN1     |  |  | SLC2A1    |  |
|  | CEP70    | AOX1     |  |  | AKR1B1    |  |
|  | RNF187   | GK       |  |  | PRAME     |  |
|  | F2R      | FOXP1    |  |  | CLIC1     |  |
|  | CXXC1    | S1PR3    |  |  | JMJD6     |  |
|  | SLC26A2  | JARID2   |  |  | FZD10     |  |

|  |           |           |  |  |          |  |
|--|-----------|-----------|--|--|----------|--|
|  | GNL3L     | SEL1L3    |  |  | FTL      |  |
|  | N4BP3     | FIG4      |  |  | TRIM27   |  |
|  | NRBP1     | PLAT      |  |  | PERP     |  |
|  | SLC26A11  | KDM4C     |  |  | CHPF2    |  |
|  | ANKRD23   | EDEM1     |  |  | XBP1     |  |
|  | ASPM      | AP1G1     |  |  | MGLL     |  |
|  | NCAPD2    | GAA       |  |  | SERPINB1 |  |
|  | HOXB3     | TUBGCP3   |  |  | USP1     |  |
|  | IK        | ID2       |  |  | ADM      |  |
|  | SNAPC1    | POP1      |  |  | UBE2Q1   |  |
|  | SNX17     | USP54     |  |  | HSPA1B   |  |
|  | OAZ1      | WAC       |  |  | PDPN     |  |
|  | UGT1A1    | GALNT1    |  |  | KLHL15   |  |
|  | TAGAP     | LGALS3    |  |  | PTMS     |  |
|  | PLOD3     | GMEB2     |  |  | MCRIP1   |  |
|  | FAM118A   | BTBD6     |  |  | DDR1     |  |
|  | CCDC85B   | RANBP6    |  |  | SESN2    |  |
|  | MEAK7     | SNRPA1    |  |  | DDX60    |  |
|  | BRMS1     | COL9A3    |  |  | LARP4    |  |
|  | HSH2D     | TIGD7     |  |  | PCM1     |  |
|  | LINC01277 | LINC00839 |  |  | PSMB10   |  |
|  | LGALSL    | PRR12     |  |  | CYB561   |  |
|  | PSMC2     | DNAJA1    |  |  | TSPAN13  |  |
|  | RNF13     | LINC00355 |  |  | TUBE1    |  |
|  | SLC39A4   | VOPP1     |  |  | HPSE     |  |
|  | DNAL4     | VEGFC     |  |  | PCSK5    |  |
|  | MRE11     | PARN      |  |  | DAAM1    |  |
|  | SLC35B2   | PAK1IP1   |  |  | ZBTB7B   |  |
|  | UBC       | PLCB3     |  |  | UTP20    |  |
|  | NTF3      | ZBED5     |  |  | SEMA5A   |  |

|  |           |              |  |  |           |  |
|--|-----------|--------------|--|--|-----------|--|
|  | L3MBTL2   | PAXIP1-AS2   |  |  | HHEX      |  |
|  | TAS2R38   | SLCO1B1      |  |  | ACP3      |  |
|  | ACBD7     | DPYSL2       |  |  | SIX4      |  |
|  | PI4KAP2   | HSPA4L       |  |  | SULT2B1   |  |
|  | PSME2     | VAC14        |  |  | UNC93B1   |  |
|  | SAA2      | ANP32B       |  |  | PCYOX1L   |  |
|  | RAVER2    | ZNF566       |  |  | METRNL    |  |
|  | DPF1      | TNFRSF14-AS1 |  |  | TPP2      |  |
|  | NEPRO     | ARHGEF18     |  |  | KYNU      |  |
|  | C3        | SERPINB8     |  |  | ALPP      |  |
|  | CEP295    | WDR44        |  |  | SOX9      |  |
|  | TNFAIP1   | VPS16        |  |  | NXPE3     |  |
|  | RIF1      | FOXA2        |  |  | PSORS1C1  |  |
|  | SLFN5     | RNF166       |  |  | PARM1     |  |
|  | JADE1     | BCAR3        |  |  | RSRP1     |  |
|  | ENTPD8    | SRP54        |  |  | CES2      |  |
|  | BRI3      | HNRNPF       |  |  | PGGHG     |  |
|  | DAPK3     | CLIC5        |  |  | RIT1      |  |
|  | TARS3     | NFYA         |  |  | B3GNT7    |  |
|  | NUP188    | CLDN7        |  |  | CYP4F11   |  |
|  | ICE2      | NOB1         |  |  | PANX2     |  |
|  | FOXJ3     | CACTIN       |  |  | KLHL22    |  |
|  | LINC02784 | LPCAT1       |  |  | AACS      |  |
|  | TUBB8     | MED22        |  |  | NANOS1    |  |
|  | EML6      | PTHLH        |  |  | LINC00885 |  |
|  | URB1      | GNAZ         |  |  | EXO1      |  |
|  | MTM1      | ZNF354C      |  |  | LAPTM4B   |  |
|  | EYA3      | IL36G        |  |  | TFAP2A    |  |
|  | TPT1-AS1  | PNPLA6       |  |  | MSL1      |  |
|  | RFC3      | CORO1A       |  |  | COL4A1    |  |

|  |           |          |  |  |         |  |
|--|-----------|----------|--|--|---------|--|
|  | NRBP2     | MESD     |  |  | MAL     |  |
|  | LINC00504 | PIAS2    |  |  | DBNL    |  |
|  | MAB21L3   | BMP4     |  |  | TRAPPC3 |  |
|  | DCP2      | TMEM176B |  |  | SH2D5   |  |
|  | TRA2A     | STX5     |  |  | FZD7    |  |
|  | HCP5      | TRIM47   |  |  | YAP1    |  |
|  | RBM3      | TCTN3    |  |  | WASHC2C |  |
|  | GNPTG     | HCG4     |  |  | MAP2    |  |
|  | RPUSD1    | RBFOX2   |  |  | ZNF440  |  |
|  | DYNLL1    | DNAJB12  |  |  | SIDT1   |  |
|  | KTN1      | TNNT2    |  |  | MORC4   |  |
|  | KLK8      | TXNDC17  |  |  | MEGF9   |  |
|  | PIK3CB    | ERC1     |  |  | PLEKHM2 |  |
|  | USP28     | AR       |  |  | SSPN    |  |
|  | TTF2      | ZKSCAN4  |  |  | REPS1   |  |
|  | GJB3      | TRAPPC6B |  |  | TRIM35  |  |
|  | PATL1     | DIPK1A   |  |  | CARMIL1 |  |
|  | POU2F1    | MMS22L   |  |  | POLR1E  |  |
|  | LRRC8B    | CPNE8    |  |  | RASD2   |  |
|  | TMTC3     | MASTL    |  |  | ETV7    |  |
|  | SMC4      | ATMIN    |  |  | XPOT    |  |
|  | SAA1      | DZIP1    |  |  | RIC8A   |  |
|  | UTRN      | CCNG1    |  |  | AMOTL2  |  |
|  | APBB3     | CSPG4    |  |  | NMD3    |  |
|  | NCOA5     | PPP2R5C  |  |  | BORCS8  |  |
|  | FLOT2     | DHX37    |  |  | SF3B3   |  |
|  | LINC01764 | SNRNP70  |  |  | CLINT1  |  |
|  | FHAD1     | ZFP36L2  |  |  | RRP12   |  |
|  | SYTL1     | MTHFD2P1 |  |  | MALT1   |  |
|  | AP1AR     | AMOT     |  |  | RBM26   |  |

|  |           |          |  |  |          |  |
|--|-----------|----------|--|--|----------|--|
|  | RAD21     | NIPAL3   |  |  | LMO2     |  |
|  | CDR2      | PITPNB   |  |  | KCTD11   |  |
|  | TJAP1     | FRRS1    |  |  | CCDC38   |  |
|  | RHBDD2    | MACROD2  |  |  | ERGIC3   |  |
|  | LCAL1     | CDC25C   |  |  | CPNE7    |  |
|  | PAK1      | ASF1A    |  |  | ATOX1    |  |
|  | SNX13     | RHEX     |  |  | CHST3    |  |
|  | RPL36AP39 | C10orf95 |  |  | SPTBN2   |  |
|  | ZNF428    | MICB     |  |  | SEC23B   |  |
|  | MYBBP1A   | SKAP2    |  |  | IER5     |  |
|  | LIN54     | HACE1    |  |  | MED19    |  |
|  | INO80C    | SLC2A4RG |  |  | WDHD1    |  |
|  | WFDC2     | ZBED9    |  |  | ATP6V1D  |  |
|  | SLC22A4   | FOLR3    |  |  | CLUH     |  |
|  | JOSD2     | FAT2     |  |  | DEF8     |  |
|  | AGL       | CXorf38  |  |  | TRIP6    |  |
|  | KLK7      | KRT19    |  |  | MTPN     |  |
|  | EML5      | ODF2     |  |  | KCTD17   |  |
|  | SLC44A1   | ZMYND10  |  |  | CXXC5    |  |
|  | PSMB7     | ANK2     |  |  | HACD4    |  |
|  | PIGN      | DESI1    |  |  | GBP5     |  |
|  | LINC02026 | PPP1R26  |  |  | NCKAP5L  |  |
|  | PPP1R37   | ITGB5    |  |  | SLC38A1  |  |
|  | ERAP1     | C16orf72 |  |  | UBR7     |  |
|  | DCLRE1A   | STK26    |  |  | PRR29    |  |
|  | WBP11     | ZER1     |  |  | TNS4     |  |
|  | CEP55     | WDR89    |  |  | NMB      |  |
|  | VWA2      | PGF      |  |  | ANKRD33B |  |
|  | LGALS9C   | LY6G5C   |  |  | SLC39A13 |  |
|  | EPHA4     | TMEM181  |  |  | TMEM98   |  |



|  |           |          |  |  |          |  |
|--|-----------|----------|--|--|----------|--|
|  | HS6ST1    | MAGEA3   |  |  | SYT17    |  |
|  | PSMD8     | RBM17    |  |  | KAZN     |  |
|  | PYM1      | DNM2     |  |  | ISYNA1   |  |
|  | TCFL5     | CCN1     |  |  | PHGDH    |  |
|  | COL12A1   | ZNF226   |  |  | ACTR1A   |  |
|  | ESF1      | BMS1P10  |  |  | SSBP3    |  |
|  | PNRC1     | P3H1     |  |  | KLF4     |  |
|  | GEMIN7    | FGFR4    |  |  | DSC3     |  |
|  | RHCG      | LANCL2   |  |  | NOLC1    |  |
|  | DNAJC3-DT | TTC6     |  |  | DYNLT1   |  |
|  | DLG5      | NCS1     |  |  | SMPD2    |  |
|  | BUB1B     | MNAT1    |  |  | NAV1     |  |
|  | LINC02068 | ZNF512B  |  |  | FAM219A  |  |
|  | NUTM2D    | UTP23    |  |  | GPS1     |  |
|  | KIAA2013  | ZFYVE21  |  |  | WNT4     |  |
|  | AIF1L     | SLITRK6  |  |  | AGO1     |  |
|  | FGD4      | ARFGAP2  |  |  | FLOT1    |  |
|  | RHOC      | KCNH3    |  |  | DENND4A  |  |
|  | NAA80     | RAB3B    |  |  | CCDC134  |  |
|  | TMEM161A  | TUBB2A   |  |  | BDKRB2   |  |
|  | ANP32E    | C10orf99 |  |  | UGT8     |  |
|  | ARHGAP11A | SHCBP1   |  |  | SIGIRR   |  |
|  | MAZ       | PIM3     |  |  | PPP6R2   |  |
|  | LTB4R2    | NUDT21   |  |  | MAL2     |  |
|  | NCDN      | GRB14    |  |  | SPRED1   |  |
|  | ANKRD29   | KLF10    |  |  | MFSD2A   |  |
|  | CYB5RL    | CCDC102A |  |  | SNTB2    |  |
|  | PPIB      | SH3GLB2  |  |  | NFASC    |  |
|  | GTPBP1    | FNTB     |  |  | ARHGEF19 |  |
|  | MIDEAS    | CYB561A3 |  |  | TNFSF10  |  |

|  |          |          |  |  |           |  |
|--|----------|----------|--|--|-----------|--|
|  | FAM81A   | CYTOR    |  |  | YWHAQ     |  |
|  | MED21    | SEPTIN6  |  |  | FAM107B   |  |
|  | NOL8     | CADM2    |  |  | SMURF2    |  |
|  | BBS10    | ARMT1    |  |  | C6orf226  |  |
|  | KDM3B    | QKI      |  |  | RGS14     |  |
|  | SMC6     | HNRNPA1  |  |  | B3GALT4   |  |
|  | TFG      | TFR2     |  |  | RALGAPA2  |  |
|  | RUSF1    | STAT6    |  |  | SLC1A5    |  |
|  | PELP1    | HMGB3    |  |  | GATA2-AS1 |  |
|  | MBD1     | COL5A2   |  |  | VTCN1     |  |
|  | ETV3     | MFAP3L   |  |  | OSBPL3    |  |
|  | TSC22D2  | PTPRA    |  |  | EIF4EBP2  |  |
|  | RAPH1    | HARS1    |  |  | NUP43     |  |
|  | ZDHHC14  | ZNF75A   |  |  | TOLLIP    |  |
|  | CTNNBIP1 | MET      |  |  | MSH6      |  |
|  | TCTA     | SPOCK1   |  |  | KRT8      |  |
|  | POLD3    | CCN3     |  |  | SRPK2     |  |
|  | EIF2AK3  | TMEM255B |  |  | UBXN1     |  |
|  | CCDC192  | RPL13A   |  |  | IL18R1    |  |
|  | SKP1     | RFNG     |  |  | SEMA3E    |  |
|  | MTUS1    | CDRT1    |  |  | CIITA     |  |
|  | SH3RF2   | CYLD     |  |  | TSPYL1    |  |
|  | COL1A1   | CDC40    |  |  | UBLCP1    |  |
|  | SNRK-AS1 | COG8     |  |  | OLFML2A   |  |
|  | PRDM11   | GPSM3    |  |  | FUT11     |  |
|  | VGLL4    | ETS2     |  |  | FAM53C    |  |
|  | BMS1P1   | USP7     |  |  | GADD45A   |  |
|  | PPP1R35  | OVOL2    |  |  | MARCKS    |  |
|  | UBE2S    | DRAM1    |  |  | MARCO     |  |
|  | GIN54    | PRPSAP1  |  |  | PAQR4     |  |

|  |          |           |  |  |         |  |
|--|----------|-----------|--|--|---------|--|
|  | MYRF     | CAMK1     |  |  | POGLUT1 |  |
|  | VPS37C   | GAD1      |  |  | DSC2    |  |
|  | SIN3B    | ZNF37BP   |  |  | STX12   |  |
|  | CNOT1    | GPX7      |  |  | PSTPIP2 |  |
|  | KIF14    | LAMC1     |  |  | SLC9A7  |  |
|  | CH25H    | SPATA5L1  |  |  | CTSZ    |  |
|  | RIN3     | SMAD2     |  |  | WDR3    |  |
|  | FSTL3    | FAT3      |  |  | GRB7    |  |
|  | USP37    | NOC3L     |  |  | UTP25   |  |
|  | SLC44A3  | ZFYVE26   |  |  | SWAP70  |  |
|  | ZDHHC23  | SCART1    |  |  | MMP28   |  |
|  | OBI1     | ZNF302    |  |  | SYTL2   |  |
|  | ARSD     | ZDHHC7    |  |  | RAB17   |  |
|  | TBC1D31  | ARL4A     |  |  | TENM2   |  |
|  | ASS1     | PLBD1-AS1 |  |  | PLEKHG5 |  |
|  | OXR1     | ZNF563    |  |  | ALPK3   |  |
|  | MPP7     | IST1      |  |  | ABCC5   |  |
|  | SOX12    | AXIN1     |  |  | SEMA3C  |  |
|  | GCOM1    | ZNF443    |  |  | ENO2    |  |
|  | LRP6     | ACVR1     |  |  | EIF3F   |  |
|  | PDLIM7   | PFKL      |  |  | BBS2    |  |
|  | SYNE1    | BRI3BP    |  |  | VPS26A  |  |
|  | GBE1     | WHRN      |  |  | MAP4K5  |  |
|  | SLC35F2  | IMPA1     |  |  | PTPRM   |  |
|  | LRRCC1   | SLC28A1   |  |  | CBLB    |  |
|  | SASS6    | CTU2      |  |  | PTPN14  |  |
|  | HOTAIRM1 | PYGO2     |  |  | FAM3A   |  |
|  | DEPDC1   | SNX5      |  |  | GSTA4   |  |
|  | FAM241B  | EXTL3     |  |  | ITM2C   |  |
|  | TMEM120A | GTF3C6    |  |  | ABCA2   |  |

|  |           |           |  |  |            |  |
|--|-----------|-----------|--|--|------------|--|
|  | CGN       | SLC23A1   |  |  | RYK        |  |
|  | SKP2      | PAF1      |  |  | DUOXA1     |  |
|  | MBD3      | PBLD      |  |  | YPEL3      |  |
|  | DSG2      | TRHDE-AS1 |  |  | KNL1       |  |
|  | COMMD7    | AMPD2     |  |  | FAR2       |  |
|  | IFNE      | USH1G     |  |  | EXOC3L4    |  |
|  | PER2      | SPRING1   |  |  | SLC6A15    |  |
|  | RRAGC     | LYPD6     |  |  | MAPK8      |  |
|  | CDC23     | CENPBD1   |  |  | VCP        |  |
|  | TRMT2A    | YOD1      |  |  | RPS6KC1    |  |
|  | THAP9     | EIF4EBP1  |  |  | ARHGEF1    |  |
|  | ZNFX1     | PRKAR1A   |  |  | TSPAN5     |  |
|  | MRI1      | FKBPL     |  |  | PLD1       |  |
|  | L3HYPDH   | SP6       |  |  | WDR43      |  |
|  | SLC30A4   | BICDL1    |  |  | C10orf88B  |  |
|  | ALKBH5    | C1R       |  |  | YTHDF2     |  |
|  | ME1       | ANKRD13B  |  |  | RUFY3      |  |
|  | HUS1      | COL6A1    |  |  | PSMD10P1   |  |
|  | PPP1R14B  | PABIR2    |  |  | AJUBA      |  |
|  | FAM120A   | MAP4K4    |  |  | TTLL11-IT1 |  |
|  | ZNF106    | CSRNP2    |  |  | CD81       |  |
|  | UFD1      | EHF       |  |  | ZMAT3      |  |
|  | LINC02086 | HNRNPH3   |  |  | RTF2       |  |
|  | C12orf45  | FXD5      |  |  | MOGAT2     |  |
|  | U2SURP    | TANGO6    |  |  | ABITRAM    |  |
|  | ZNF286A   | STK31     |  |  | ACVR1C     |  |
|  | ETS1      | HMCES     |  |  | CLIC4      |  |
|  | ANXA5     | MEX3D     |  |  | CCDC88B    |  |
|  | FEZF1-AS1 | RBM4      |  |  | CILK1      |  |
|  | SLC52A2   | DCAF12    |  |  | FRMD6      |  |

|  |            |           |  |  |          |  |
|--|------------|-----------|--|--|----------|--|
|  | DUSP9      | CMTR2     |  |  | ABHD6    |  |
|  | HEXA       | MED24     |  |  | ELP2     |  |
|  | KCTD7      | AMD1      |  |  | EML3     |  |
|  | CCDC88A    | TAGLN3    |  |  | MFSD1    |  |
|  | CLCN1      | ZNF767P   |  |  | SH3RF3   |  |
|  | ANO6       | PARP3     |  |  | STAT4    |  |
|  | RFX3       | BMP8B     |  |  | SEPTIN11 |  |
|  | PEA15      | RUNX3     |  |  | PLEKHS1  |  |
|  | CCDC107    | GIMAP2    |  |  | GPRIN3   |  |
|  | GMFB       | MAP2K1    |  |  | MED20    |  |
|  | PCTP       | AGAP7P    |  |  | PTPN12   |  |
|  | TNFAIP2    | PRKCA     |  |  | SH3GL1   |  |
|  | INTS11     | SHROOM2   |  |  | RNF165   |  |
|  | DYNC2H1    | LINC01697 |  |  | NEAT1    |  |
|  | SEC61B     | WDR27     |  |  | C16orf54 |  |
|  | NCAPD3     | TCF4      |  |  | NDST1    |  |
|  | SNX8       | ZMYND11   |  |  | SOX13    |  |
|  | ZYG11B     | WBP1L     |  |  | SHKBP1   |  |
|  | SSU72      | MROH6     |  |  | CDC7     |  |
|  | SCYL1      | WWC3      |  |  | MLX      |  |
|  | CLTB       | COL27A1   |  |  | NRAV     |  |
|  | BANK1      | UBE2H     |  |  | ITGA1    |  |
|  | FAM111A-DT | RAD51     |  |  | KIF2C    |  |
|  | TUBA4A     | GUSB      |  |  | GBP3     |  |
|  | PLEKHG2    | SECISBP2  |  |  | HSPB8    |  |
|  | TOP2A      | DDRGK1    |  |  | LPAR3    |  |
|  | UBE2G2     | ESRP2     |  |  | WDR37    |  |
|  | CPSF1      | PKN3      |  |  | FMNL2    |  |
|  | STARD10    | YIPF2     |  |  | KIF2A    |  |
|  | MIEN1      | GNAI1     |  |  | COL4A4   |  |

|  |             |          |  |  |         |  |
|--|-------------|----------|--|--|---------|--|
|  | SNRNP40     | GABRP    |  |  | ERBB4   |  |
|  | AMN         | FBXO38   |  |  | ADRB2   |  |
|  | ZNF688      | ZC3H12C  |  |  | LHFPL6  |  |
|  | ABCE1       | CYB5A    |  |  | PWWP2B  |  |
|  | CLCA3P      | ARL5A    |  |  | NASP    |  |
|  | METTL1      | ZNF137P  |  |  | HDAC1   |  |
|  | RAC2        | ZC3H12A  |  |  | BCO1    |  |
|  | CREB3L2     | GTF2B    |  |  | SELENON |  |
|  | CENPJ       | TUBAL3   |  |  | CALD1   |  |
|  | TEP1        | INPP5A   |  |  | XPO6    |  |
|  | TXNRD3      | TMEM38A  |  |  | TMC5    |  |
|  | ADRM1       | ZNF367   |  |  | ACSL3   |  |
|  | POU3F1      | FAM91A1  |  |  | ATP11C  |  |
|  | TRIM44      | GFOD2    |  |  | GFPT1   |  |
|  | TEX101      | DHX36    |  |  | LMAN1   |  |
|  | TTI1        | MEF2D    |  |  | TALDO1  |  |
|  | IQCJ-SCHIP1 | ZEB1     |  |  | TRIB3   |  |
|  | STUB1       | CCNYL1   |  |  | MYLIP   |  |
|  | MFSD11      | IQCM     |  |  | SLC6A6  |  |
|  | PRDM1       | LAMA2    |  |  | YWHAG   |  |
|  | JUP         | ASPHD2   |  |  | UGDH    |  |
|  | TIMELESS    | TBC1D7   |  |  | TINF2   |  |
|  | BAG1        | DYNLT2   |  |  | ADAM8   |  |
|  | EEPD1       | SNX3     |  |  | CDK1    |  |
|  | DNASE1L1    | RSL1D1   |  |  | UNC5B   |  |
|  | NKAIN2      | SPATA33  |  |  | ANKRD22 |  |
|  | CHRNA4      | PPP1R14C |  |  | CCBE1   |  |
|  | MSH2        | PARG     |  |  | AKR1A1  |  |
|  | TOM1        | FGFR3    |  |  | IFNGR1  |  |
|  | CCR3        | ARL8A    |  |  | GBP6    |  |

|  |            |          |  |  |           |  |
|--|------------|----------|--|--|-----------|--|
|  | CHEK2      | ZNF597   |  |  | CHMP1A    |  |
|  | CCNY-AS1   | EMID1    |  |  | BCAN-AS1  |  |
|  | GAPDH      | PLEKHH1  |  |  | SESTD1    |  |
|  | MZT2B      | NORAD    |  |  | GALK1     |  |
|  | KRT31      | ANKRD27  |  |  | MYO6      |  |
|  | MCM2       | CTPS2    |  |  | PPP2R2B   |  |
|  | TCEANC2    | GRB2     |  |  | C6orf89   |  |
|  | EVL        | FBXL19   |  |  | SLC39A2   |  |
|  | MAT2A      | HYOU1    |  |  | LINC00842 |  |
|  | NEDD1      | GTF2IP20 |  |  | SSR4      |  |
|  | SYVN1      | TANC1    |  |  | DKC1      |  |
|  | DDX21      | CNPY3    |  |  | MLLT11    |  |
|  | MED14      | ZNF430   |  |  | RPL10     |  |
|  | ELL        | POLR3F   |  |  | ARPC5     |  |
|  | GTF2IRD1   | CXCL1    |  |  | NXF1      |  |
|  | COPZ2      | ALX1     |  |  | MVP       |  |
|  | DACH1      | CDK18    |  |  | AP5M1     |  |
|  | KLC1       | XYLT2    |  |  | NOL6      |  |
|  | AIM2       | SERPINB5 |  |  | GCNT3     |  |
|  | HOMER3-AS1 | CRKL     |  |  | PDZK1     |  |
|  | NINL       | MORC2    |  |  | PTPN13    |  |
|  | TBCK       | ZC3H14   |  |  | RAB11FIP4 |  |
|  | PDE8A      | ZNHIT6   |  |  | WDR75     |  |
|  | MME        | TMEM127  |  |  | SLC12A6   |  |
|  | ADGRG5     | ZNF585A  |  |  | GNB4      |  |
|  | ASPSCR1    | CDAN1    |  |  | CERS3     |  |
|  | AHCTF1     | LRRC20   |  |  | FOXN1     |  |
|  | GMPPA      | TACC2    |  |  | LINC02210 |  |
|  | FTH1P8     | TIAL1    |  |  | GPR157    |  |
|  | CHKA       | DLX3     |  |  | MAG       |  |

|  |          |           |  |  |           |  |
|--|----------|-----------|--|--|-----------|--|
|  | COMMD3   | C6orf120  |  |  | TMC7      |  |
|  | TMEM237  | NGLY1     |  |  | TSSC4     |  |
|  | SERF2    | UNC45A    |  |  | POLH      |  |
|  | NAA15    | HEXIM1    |  |  | TRIM5     |  |
|  | SLAMF7   | CEP43     |  |  | ORC6      |  |
|  | H2BC8    | SMIM27    |  |  | N4BP2L1   |  |
|  | JAK2     | SLC4A8    |  |  | AVPI1     |  |
|  | CFAP300  | RNF169    |  |  | UST       |  |
|  | HIVEP3   | ZNF292    |  |  | SELENOI   |  |
|  | LMAN2    | RNPS1     |  |  | SCAND1    |  |
|  | B9D2     | ZNF532    |  |  | SIPA1L2   |  |
|  | DICER1   | ESRP1     |  |  | A4GALT    |  |
|  | SMPD4    | FAM149B1  |  |  | CHMP6     |  |
|  | RPLP1    | PPP6R1    |  |  | MARS1     |  |
|  | PLP2     | CDK2      |  |  | EXOSC6    |  |
|  | HPS6     | RPS6KA1   |  |  | LINC01932 |  |
|  | TSEN2    | PITPNM1   |  |  | RER1      |  |
|  | AMTN     | SLC39A10  |  |  | PKIG      |  |
|  | ATXN10   | ABHD13    |  |  | CSNK1G3   |  |
|  | SMC1A    | INSIG1-DT |  |  | PFAS      |  |
|  | ADAT2    | UBOX5     |  |  | GJB2      |  |
|  | MKI67    | GDF11     |  |  | NUFIP2    |  |
|  | MPHOSPH9 | HLA-H     |  |  | TMEM33    |  |
|  | PFN2     | PAG1      |  |  | NXT1      |  |
|  | TTC22    | HECTD2    |  |  | PRKAR2B   |  |
|  | HECTD3   | PEPD      |  |  | ABCD4     |  |
|  | SMARCC1  | IL1R2     |  |  | MTSS2     |  |
|  | PICSAR   | ADCY1     |  |  | TMTC2     |  |
|  | RNF207   | LAPTM4A   |  |  | NUMBL     |  |
|  | UBE2D3   | GUCY1A1   |  |  | ENTPD5    |  |



|  |           |           |  |  |            |  |
|--|-----------|-----------|--|--|------------|--|
|  | NAT14     | CDC42     |  |  | CAPN12     |  |
|  | ATAD5     | TRIM46    |  |  | TMEM159    |  |
|  | TNFAIP8   | SLC2A5    |  |  | HLA-DPB1   |  |
|  | PPP2CA    | AREL1     |  |  | ING4       |  |
|  | COL5A1    | ZNF655    |  |  | MALAT1     |  |
|  | STT3B     | ASAP3     |  |  | SGSH       |  |
|  | LRCH1     | OSGEP     |  |  | CDK5       |  |
|  | RAB22A    | RPL7L1    |  |  | STEAP3-AS1 |  |
|  | EEF1D     | ALX4      |  |  | BMPR1A     |  |
|  | PLG       | DNAJC1    |  |  | SH3GLB1    |  |
|  | TMEM45A   | ALDH1A2   |  |  | RNF213     |  |
|  | CEP290    | CACFD1    |  |  | WASH9P     |  |
|  | LINC02443 | PSME3IP1  |  |  | ASCL2      |  |
|  | CDK2AP1   | C1orf116  |  |  | PROS1      |  |
|  | ASCC3     | LCK       |  |  | NIBAN2     |  |
|  | EOMES     | SOX6      |  |  | FEZ1       |  |
|  | RALGDS    | CCN2      |  |  | KCNQ5      |  |
|  | NSUN6     | FGD3      |  |  | CASP2      |  |
|  | NUDT16L1  | SCAMP5    |  |  | ZNF775     |  |
|  | PPP4R4    | BPNT2     |  |  | NEU1       |  |
|  | PRMT9     | LINC01011 |  |  | ZNF160     |  |
|  | DPAGT1    | GIN53     |  |  | GRIP1      |  |
|  | EDEM3     | NPDC1     |  |  | EVA1A      |  |
|  | APBA1     | GALNT6    |  |  | DGKH       |  |
|  | KLHL28    | HNRNPA3   |  |  | ATRN       |  |
|  | PLAAT4    | ZNRD1ASP  |  |  | FER1L4     |  |
|  | SPOCK2    | CLEC2D    |  |  | MAP3K12    |  |
|  | SLC66A2   | CTHRC1    |  |  | SH2B3      |  |
|  | TRIP4     | RPGRIP1   |  |  | PLCG1-AS1  |  |
|  | CAPNS2    | SYT5      |  |  | SLC8A1     |  |

|  |            |             |  |  |            |  |
|--|------------|-------------|--|--|------------|--|
|  | DNMT3B     | TRIM8       |  |  | WDR87BP    |  |
|  | CADM4      | AQP10       |  |  | CD22       |  |
|  | NANS       | DUSP16      |  |  | KLHL3      |  |
|  | IRF5       | AP1S2       |  |  | CALB2      |  |
|  | DUSP1      | NKX3-1      |  |  | ZFYVE27    |  |
|  | SLC30A7    | SLC12A9     |  |  | MDFIC      |  |
|  | PLEKHN1    | NQO1-DT     |  |  | RFC1       |  |
|  | TOPBP1     | ATP5MK      |  |  | ZNF695     |  |
|  | NCBP2AS2   | SUDS3       |  |  | AOC1       |  |
|  | PM20D2     | TTC31       |  |  | HLA-DRA    |  |
|  | EIF2AK2    | BRAF        |  |  | RETREG1    |  |
|  | SH3YL1     | PLEKHH3     |  |  | PRR13      |  |
|  | WDR77      | MTDH        |  |  | DKK3       |  |
|  | ZNF778     | PAPSS1      |  |  | USP10      |  |
|  | CMTM3      | PPP2R3A     |  |  | AP1M2      |  |
|  | QPCTL      | TMEM147-AS1 |  |  | TIAF1      |  |
|  | CLBA1      | PPME1       |  |  | HMG20B     |  |
|  | TOB2       | CLEC16A     |  |  | SIRPB2     |  |
|  | NAALADL2   | AHDC1       |  |  | NOTCH3     |  |
|  | WDSUB1     | SLC37A3     |  |  | MAPRE2     |  |
|  | PARP4      | FAM83E      |  |  | GLIPR1     |  |
|  | TG         | TRIM32      |  |  | ORMDL3     |  |
|  | VBP1       | NUP153-AS1  |  |  | TMEM164    |  |
|  | SLC2A1-AS1 | ADRA1D      |  |  | CD59       |  |
|  | SPTSSB     | ZNF321P     |  |  | UCKL1      |  |
|  | MBOAT7     | MXD3        |  |  | ZNF710-AS1 |  |
|  | UPRT       | SPTBN1      |  |  | KLHL36     |  |
|  | RPS6KB2    | PRMT5       |  |  | PRRT1      |  |
|  | ABCF3      | ZNF441      |  |  | VPS72      |  |
|  | LY6E-DT    | SLC43A2     |  |  | CAP2       |  |

|  |          |            |  |  |            |  |
|--|----------|------------|--|--|------------|--|
|  | NEDD4    | FSTL1      |  |  | ADD3       |  |
|  | CAMK1D   | TSPAN33    |  |  | LINC00964  |  |
|  | FAM227B  | PRSS21     |  |  | TMEM160    |  |
|  | PRMT8    | MBNL2      |  |  | CTNS       |  |
|  | PPT1     | SRD5A1     |  |  | FKBP7      |  |
|  | PRPF40A  | ZNF570     |  |  | GLIS2      |  |
|  | SLC66A3  | DBNDD1     |  |  | PDXK       |  |
|  | ROPN1L   | LSM14A     |  |  | RND3       |  |
|  | ORAI3    | ALG1       |  |  | SACS       |  |
|  | TMEM43   | HSF2       |  |  | ATG16L1    |  |
|  | TRIM22   | MYH14      |  |  | RABGGTB    |  |
|  | BRIP1    | ERMARD     |  |  | HACD2      |  |
|  | NPAT     | PLOD2      |  |  | TUT4       |  |
|  | SCAI     | WTIP       |  |  | METRNL     |  |
|  | MYZAP    | ADGRD1-AS1 |  |  | ESPL1      |  |
|  | CBL      | MSI2       |  |  | LMCD1      |  |
|  | NSF      | GTF3C1     |  |  | CYP2U1-AS1 |  |
|  | CAPN7    | ARMH3      |  |  | ERCC1      |  |
|  | OIP5-AS1 | GPR85      |  |  | ADAM28     |  |
|  | ZNF664   | CELSR1     |  |  | EHD1       |  |
|  | DOK7     | SYNE2      |  |  | VAV3       |  |
|  | ARPC3    | TULP3      |  |  | CHST7      |  |
|  | GTPBP8   | WDR62      |  |  | STAC       |  |
|  | TRIM14   | ISG20L2    |  |  | SETD7      |  |
|  | TC2N     | TPRN       |  |  | COPS6      |  |
|  | SLF2     | MCM7       |  |  | SERPINI1   |  |
|  | TOR1B    | CDIN1      |  |  | TARS1      |  |
|  | KLRC2    | RCBTB2     |  |  | MAN2C1     |  |
|  | CC2D1B   | OPN3       |  |  | FAM177A1   |  |
|  | VPS33A   | PPP3CB-AS1 |  |  | BFAR       |  |

|  |           |            |  |  |          |  |
|--|-----------|------------|--|--|----------|--|
|  | LRRK1     | GPRC5D-AS1 |  |  | SUPT16H  |  |
|  | SEC14L4   | LRRFIP2    |  |  | ZDHHC20  |  |
|  | AP1S3     | DUBR       |  |  | CTNND1   |  |
|  | TMEM161B  | PPP2R3B    |  |  | LAMTOR1  |  |
|  | CACYBP    | TM9SF1     |  |  | ATXN3    |  |
|  | NUP155    | SEC24C     |  |  | CYP4V2   |  |
|  | BBX       | DLGAP1-AS2 |  |  | KLF6     |  |
|  | LINC01547 | PNPLA4     |  |  | RRN3     |  |
|  | MRTFB     | RGS17      |  |  | NR5A2    |  |
|  | RAB6A     | SH3KBP1    |  |  | PSMB1    |  |
|  | EIF2S3    | BTBD19     |  |  | DNAJB11  |  |
|  | MAGI1     | KATNAL1    |  |  | UBE2E2   |  |
|  | OGT       | CAPN14     |  |  | ZNF879   |  |
|  | HOXA-AS3  | JRK        |  |  | BARD1    |  |
|  | MB21D2    | PIGC       |  |  | KIFC3    |  |
|  | ATG4A     | FANCA      |  |  | PAPLN    |  |
|  | PPP1R16A  | GPATCH4    |  |  | TCP11L2  |  |
|  | VMP1      | MED23      |  |  | HLA-DRB5 |  |
|  | TANK      | SLC7A6OS   |  |  | INPP5B   |  |
|  | ATP6V1E2  | TRIB2      |  |  | ROR1     |  |
|  | STX8      | MYC        |  |  | TEX2     |  |
|  | MIR23AHG  | SELENOW    |  |  | HS3ST1   |  |
|  | H4C8      | TMEM80     |  |  | SEC14L2  |  |
|  | HOOK1     | ACP2       |  |  | ATXN2L   |  |
|  | ZNF618    | PCED1B     |  |  | MMRN2    |  |
|  | DMXL1     | LUZP1      |  |  | RGL2     |  |
|  | POLR2B    | SV2A       |  |  | TMUB1    |  |
|  | GCA       | ASPH       |  |  | ADAT1    |  |
|  | POLR2E    | CTDSP2     |  |  | MPP5     |  |
|  | KIF24     | SERINC1    |  |  | TAPBPL   |  |

|  |             |          |  |  |           |  |
|--|-------------|----------|--|--|-----------|--|
|  | C7orf50     | PSMG2    |  |  | CCDC74B   |  |
|  | BRK1        | WFDC5    |  |  | TMEM63A   |  |
|  | RTP4        | BTBD10   |  |  | FAM219B   |  |
|  | RNF20       | GLDN     |  |  | NUP153    |  |
|  | LINC02577   | NQO1     |  |  | ZNF217    |  |
|  | CPTP        | GMDS-DT  |  |  | MLH3      |  |
|  | APOBEC3F    | RBM11    |  |  | HDAC9     |  |
|  | RNF157-AS1  | REV3L    |  |  | COL17A1   |  |
|  | TRMT112     | C16orf70 |  |  | CEP83     |  |
|  | DIAPH1      | CFDP1    |  |  | GOLM2     |  |
|  | CLPTM1L     | CGB7     |  |  | TMEM201   |  |
|  | UBL7        | PCDH7    |  |  | KLK4      |  |
|  | TSR1        | TNS1     |  |  | ELOB      |  |
|  | MAP3K14-AS1 | NR1H3    |  |  | SUN1      |  |
|  | SETDB2      | CERK     |  |  | PEX10     |  |
|  | NOTCH1      | TERF2IP  |  |  | AFDN      |  |
|  | BCL7C       | JRKL     |  |  | CDKL5     |  |
|  | ZNHIT1      | MIR205   |  |  | EXOC8     |  |
|  | JAK1        | DDX1     |  |  | THRB      |  |
|  | ADCY4       | FBLN5    |  |  | NAP1L4    |  |
|  | PRXL2C      | PINLYP   |  |  | RBM15     |  |
|  | PGLYRP3     | DAP      |  |  | TOR1A     |  |
|  | SCAF11      | DDX19A   |  |  | CPA6      |  |
|  | ZNF785      | ZNF433   |  |  | IL15      |  |
|  | LRRC41      | MT2A     |  |  | ENO3      |  |
|  | CEP152      | CPAMD8   |  |  | ZNF362    |  |
|  | NAA10       | FAM204A  |  |  | NPSR1-AS1 |  |
|  | CLK3        | ABCB11   |  |  | RASL12    |  |
|  | PLEKHM1     | NFATC1   |  |  | CD99      |  |
|  | ASAH2B      | AKAP12   |  |  | SLFN13    |  |

|  |           |            |  |  |            |  |
|--|-----------|------------|--|--|------------|--|
|  | PTPRJ     | HLA-DOA    |  |  | STK17B     |  |
|  | OTUB1     | SYNGR3     |  |  | UBE2E1     |  |
|  | E2F8      | STAC3      |  |  | KRT15      |  |
|  | UBE2L6    | ZNF398     |  |  | NGEF       |  |
|  | PMS2      | ROBO3      |  |  | SNN        |  |
|  | EDF1      | PRKD1      |  |  | PSMC1      |  |
|  | HEATR5A   | HMOX2      |  |  | DYRK1B     |  |
|  | DAZAP2    | CENPB      |  |  | ANGEL1     |  |
|  | H2BC19P   | DCBLD1     |  |  | TMEM234    |  |
|  | TMEM199   | DEAF1      |  |  | SLC7A7     |  |
|  | LINC00472 | SPECC1     |  |  | RAB1A      |  |
|  | WDR41     | ZNF549     |  |  | TLL2       |  |
|  | CENPF     | RNF212     |  |  | RP2        |  |
|  | AFAP1     | GIN52      |  |  | AP2A1      |  |
|  | CCNF      | AMPD3      |  |  | PIK3CD-AS2 |  |
|  | LRBA      | PVR        |  |  | RALGPS1    |  |
|  | TMEM130   | MIRLET7BHG |  |  | LYPD6B     |  |
|  | FAM135A   | ABHD4      |  |  | ORC3       |  |
|  | SNORA59A  | MEGF8      |  |  | RAI1       |  |
|  | SDF4      | CKB        |  |  | RTN2       |  |
|  | PSMC5     | KRR1       |  |  | ITGA4      |  |
|  | GEMIN8    | INPP4B     |  |  | RASGEF1B   |  |
|  | MUC15     | MINPP1     |  |  | TAP1       |  |
|  | TMEM134   | MAGEA4-AS1 |  |  | ADGRE1     |  |
|  | NUP107    | PAX6       |  |  | MAPK6      |  |
|  | MAPRE3    | PRMT7      |  |  | MEF2C      |  |
|  | SOCS3     | SUCLG2-AS1 |  |  | S100A8     |  |
|  | NUFIP1    | DPP7       |  |  | ENAH       |  |
|  | SLC39A11  | MAMDC2     |  |  | RNF5       |  |
|  | SERTAD4   | ELOVL7     |  |  | IL31RA     |  |

|  |          |          |  |  |           |  |
|--|----------|----------|--|--|-----------|--|
|  | SLC9A8   | TAF9B    |  |  | DIP2B     |  |
|  | DIS3L    | PARD6B   |  |  | BNIPL     |  |
|  | PADI4    | C12orf66 |  |  | EVI5L     |  |
|  | CDSN     | PSMF1    |  |  | SDR16C5   |  |
|  | RCN1P2   | DRD4     |  |  | FANCC     |  |
|  | POFUT1   | MDH1     |  |  | BRD8      |  |
|  | NR2F2    | JUND     |  |  | JCAD      |  |
|  | ZBTB4    | HOXA7    |  |  | NUDCD1    |  |
|  | ANKZF1   | AURKB    |  |  | ST13      |  |
|  | RPS27L   | ARID1B   |  |  | RASA2     |  |
|  | DYRK2    | ATG14    |  |  | KRT8P3    |  |
|  | UBR5     | PLAAT3   |  |  | PHTF2     |  |
|  | RBMX2    | BICRAL   |  |  | CAMK2D    |  |
|  | NEK2     | SPNS2    |  |  | CNTNAP1   |  |
|  | SUV39H1  | IFIT5    |  |  | MAP3K2    |  |
|  | UVRAG    | SPRED2   |  |  | HLA-B     |  |
|  | HIC1     | DIAPH3   |  |  | C11orf68  |  |
|  | RPS28    | TMCC1    |  |  | RAB25     |  |
|  | SAT2     | ERICH2   |  |  | JADE2     |  |
|  | PLSCR1   | MANBAL   |  |  | RBM42     |  |
|  | MIR9-3HG | DNAAF3   |  |  | SPG21     |  |
|  | MPZL1    | KANSL1L  |  |  | RPP38     |  |
|  | FANCI    | SORBS3   |  |  | ZSCAN12   |  |
|  | IP6K2    | BORCS7   |  |  | HOXD8     |  |
|  | PTOV1    | PRUNE1   |  |  | OPTN      |  |
|  | NHP2     | NOD2     |  |  | MAP3K21   |  |
|  | NCOA2    | RANGAP1  |  |  | LINC01588 |  |
|  | C15orf40 | DOCK1    |  |  | TGM2      |  |
|  | MYL6B    | ATP11A   |  |  | CCDC25    |  |
|  | NAGLU    | ITM2B    |  |  | SREBF2    |  |

|  |          |            |  |  |            |  |
|--|----------|------------|--|--|------------|--|
|  | SLC4A1AP | EEF1A1     |  |  | TCERG1     |  |
|  | ATP6V1E1 | SLC2A8     |  |  | ZNF746     |  |
|  | UBL3     | PML        |  |  | FBR5       |  |
|  | MEP1A    | ZNF14      |  |  | HDAC6      |  |
|  | ARF1     | CAMTA1     |  |  | EFNB2      |  |
|  | STK4     | RUSC2      |  |  | RASSF2     |  |
|  | RPS19BP1 | EIF2B2     |  |  | MT1X       |  |
|  | FAM174C  | HDGFL2     |  |  | NUP98      |  |
|  | APRT     | HCLS1      |  |  | PCSK6      |  |
|  | PSMD4    | CENPU      |  |  | ZCCHC7     |  |
|  | SNX22    | STX7       |  |  | LNK1       |  |
|  | STEAP2   | RPL36A     |  |  | FGF22      |  |
|  | MDM1     | MARK3      |  |  | DDO        |  |
|  | INPP5D   | PRMT1      |  |  | MYORG      |  |
|  | GOLPH3L  | HES4       |  |  | MAFG       |  |
|  | NEK9     | SNHG12     |  |  | ZNF615     |  |
|  | CBX5     | PPP2R5D    |  |  | LRRC8C     |  |
|  | FLJ42969 | USP25      |  |  | SLX4IP     |  |
|  | AKNA     | LEPR       |  |  | CPZ        |  |
|  | MZT2A    | B2M        |  |  | RPLP2      |  |
|  | PADI2    | TFAP2A-AS1 |  |  | KRT17      |  |
|  | TRPM7    | BCL10      |  |  | ARHGAP12   |  |
|  | TMEM47   | SMPD4P1    |  |  | IFT43      |  |
|  | LRRC8A   | RIMKLB     |  |  | ADARB2     |  |
|  | CCS      | SPATC1L    |  |  | ERVMER34-1 |  |
|  | TUBB6    | LIMK1      |  |  | AP2M1      |  |
|  | METTL9   | LMBR1      |  |  | ZNF224     |  |
|  | PLPP6    | PHKB       |  |  | MDK        |  |
|  | GJB5     | MOGS       |  |  | DFFB       |  |
|  | SIN3A    | PLEKHF1    |  |  | FN3K       |  |



|  |           |          |  |  |           |  |
|--|-----------|----------|--|--|-----------|--|
|  | LINC01978 | CALCOCO1 |  |  | YWHAB     |  |
|  | AP3D1     | PHETA2   |  |  | EXPH5     |  |
|  | TRIOBP    | KIAA1586 |  |  | DCAF13    |  |
|  | SHARPIN   | SMARCD1  |  |  | DDOST     |  |
|  | ZC3HAV1L  | ATG12    |  |  | TENT5C    |  |
|  | POU5F1    | PLCD1    |  |  | UFL1      |  |
|  | CEP192    | ICMT     |  |  | ZNF121    |  |
|  | IPO8      | UGCG     |  |  | DLGAP5    |  |
|  | DGCR2     | CDC123   |  |  | SEMA7A    |  |
|  | NWD1      | SAMD15   |  |  | NOL3      |  |
|  | HSPA5     | IRX5     |  |  | BMPR1B    |  |
|  | IFNAR2    | ATG101   |  |  | MBTD1     |  |
|  | CHFR      | SBNO1    |  |  | NCR3LG1   |  |
|  | SSH1      | ZBTB47   |  |  | ARSJ      |  |
|  | DRAP1     | HDAC5    |  |  | RNF41     |  |
|  | IRS2      | LSM14B   |  |  | KDM4A-AS1 |  |
|  | CDK17     | PIGT     |  |  | CSTB      |  |
|  | DNAJC13   | ATP8B3   |  |  | PLPPR2    |  |
|  | RERE      | BTBD11   |  |  | GDE1      |  |
|  | SCUBE3    | TMEM138  |  |  | ARPC4     |  |
|  | FOXN3     | CDK10    |  |  | H2BC11    |  |
|  | QSER1     | CEBPZOS  |  |  | NECTIN3   |  |
|  | MXRA5Y    | CCDC167  |  |  | FLJ20021  |  |
|  | MAPK10    | PKD2     |  |  | TLE3      |  |
|  | FXR2      | BLOC1S3  |  |  | SIGMAR1   |  |
|  | RCBTB1    | ZNF571   |  |  | ACBD5     |  |
|  | ULK1      | EIF4G2   |  |  | ASH2L     |  |
|  | MCM6      | USP13    |  |  | ZFAND5    |  |
|  | TMPO-AS1  | KIF3C    |  |  | SEC24D    |  |
|  | TRMT13    | PDCD2    |  |  | SNRPB     |  |

|  |            |           |  |  |          |  |
|--|------------|-----------|--|--|----------|--|
|  | ATE1       | CBLC      |  |  | PLAA     |  |
|  | SEL1L      | EPN2      |  |  | IPO9     |  |
|  | TICRR      | RNF6      |  |  | BASP1    |  |
|  | RHOBTB3    | AP5S1     |  |  | MBD6     |  |
|  | SLC22A18AS | PTENP1    |  |  | PSMD13   |  |
|  | FAAP20     | LRRC23    |  |  | MAGI3    |  |
|  | NFE2L3     | FLVCR1    |  |  | KMT5A    |  |
|  | SECISBP2L  | ZNF512    |  |  | ATG5     |  |
|  | PLEKHA8    | TBC1D14   |  |  | KIAA0930 |  |
|  | CEP57L1    | PNLIPRP3  |  |  | ILRUN    |  |
|  | ZNF658B    | LRRC37A4P |  |  | MNS1     |  |
|  | CEL        | CAPN3     |  |  | KLHL9    |  |
|  | LINC01465  | CAMKMT    |  |  | MRC2     |  |
|  | ZBTB33     | CNOT3     |  |  | EIF5     |  |
|  | DAZAP1     | SH3BP5    |  |  | PCGF3    |  |
|  | KNTC1      | TROAP     |  |  | HSBP1L1  |  |
|  | TMPRSS3    | STIM1     |  |  | CARS1    |  |
|  | MTA2       | MOB1A     |  |  | RGS3     |  |
|  | SPAG4      | CD27-AS1  |  |  | SP2      |  |
|  | ZNF311     | UHMK1     |  |  | NHSL2    |  |
|  | RNU6-140P  | PCSK9     |  |  | POLR3D   |  |
|  | GVINP1     | AGAP2     |  |  | TSPAN2   |  |
|  | FAM214A    | SLC7A6    |  |  | GSK3A    |  |
|  | ITGA5      | POC1A     |  |  | PTDSS2   |  |
|  | DDIT3      | ARL13B    |  |  | ATP6V0E1 |  |
|  | COL4A3     | NCCRP1    |  |  | ATP2B1   |  |
|  | ROPN1B     | SCGB1A1   |  |  | BTBD3    |  |
|  | BROX       | C5AR1     |  |  | ICOSLG   |  |
|  | TIPIN      | RFFL      |  |  | RARRES2  |  |
|  | PSMB9      | CALM3     |  |  | SEC61A1  |  |

|  |           |          |  |  |          |  |
|--|-----------|----------|--|--|----------|--|
|  | TRNAU1AP  | POMT1    |  |  | AK9      |  |
|  | LRRC56    | PAK4     |  |  | TBCC     |  |
|  | ZMAT5     | PHYKPL   |  |  | BZW2     |  |
|  | BCAP31    | MTAP     |  |  | VPS36    |  |
|  | KRTAP4-1  | CEPT1    |  |  | NTAN1    |  |
|  | FBXW5     | MTCL1    |  |  | DENND2C  |  |
|  | KRT4      | BFSP1    |  |  | CTR9     |  |
|  | BTBD8     | UPF2     |  |  | S100A14  |  |
|  | C1orf109  | TBP      |  |  | ZFP90    |  |
|  | STEAP1    | GPR176   |  |  | MIR31HG  |  |
|  | LINC00174 | TLR2     |  |  | SNRPB2   |  |
|  | FAM89B    | LSR      |  |  | RAB1B    |  |
|  | RPL29     | CYBA     |  |  | GMCL1    |  |
|  | PIGW      | TAB2     |  |  | CIP2A    |  |
|  | CKAP5     | ARHGEF26 |  |  | ZNF675   |  |
|  | ZNF786    | TRPS1    |  |  | ZBTB9    |  |
|  | EHBP1     | RPP40    |  |  | HRK      |  |
|  | DCTN3     | FGR      |  |  | ATP13A2  |  |
|  | TPI1      | CXCL2    |  |  | AP2A2    |  |
|  | CDC42EP3  | CDKN2A   |  |  | ANAPC16  |  |
|  | RAB3IL1   | USP39    |  |  | SLC16A7  |  |
|  | CCDC85C   | AIMP1    |  |  | BBIP1    |  |
|  | NPLOC4    | PROSER3  |  |  | EEF1E1   |  |
|  | C5orf34   | ZHX1     |  |  | TNS3     |  |
|  | NCK1      | RIPK4    |  |  | C19orf71 |  |
|  | LINC02863 | PPP5C    |  |  | DHX16    |  |
|  | COPS7A    | INPP5J   |  |  | ZBTB38   |  |
|  | RAB3GAP1  | NIPAL2   |  |  | CASP8AP2 |  |
|  | LINC00592 | AGFG2    |  |  | LIPC     |  |
|  | GTF2H5    | P3H4     |  |  | APOBEC3G |  |

|  |            |          |  |  |            |  |
|--|------------|----------|--|--|------------|--|
|  | SERTAD3    | KLHL42   |  |  | PIGU       |  |
|  | TADA2A     | GHDC     |  |  | EIF3A      |  |
|  | MUS81      | ULBP3    |  |  | CHMP5      |  |
|  | ECT2       | GNL3     |  |  | NSUN7      |  |
|  | BTC        | FAM102B  |  |  | KANK1      |  |
|  | TPT1       | SARS1    |  |  | PSMD10P2   |  |
|  | NFATC2IP   | MED6     |  |  | TAF6L      |  |
|  | RBM41      | CSRP2    |  |  | LAMB3      |  |
|  | NENF       | TNFAIP3  |  |  | UBR2       |  |
|  | TCEA1      | C10orf55 |  |  | ZNF714     |  |
|  | VAMP8      | FOLR1    |  |  | ORC1       |  |
|  | UBXN2A     | TAF1C    |  |  | CHASERR    |  |
|  | CCDC50     | CELF1    |  |  | CC2D2A     |  |
|  | STEAP1B    | NELFB    |  |  | CORO2B     |  |
|  | RHOA       | ZUP1     |  |  | FHOD1      |  |
|  | TLCD3A     | IGSF10   |  |  | TTC13      |  |
|  | BLOC1S4    | ACTR2    |  |  | ARL6IP1    |  |
|  | MYPOP      | MTMR9LP  |  |  | SLC6A8     |  |
|  | MED14OS    | SPATA6   |  |  | IQGAP3     |  |
|  | RNU6-1161P | TRADD    |  |  | CDKN2AIPNL |  |
|  | SIX5       | SACM1L   |  |  | ELF4       |  |
|  | HNRNPH1P1  | POLE2    |  |  | SMURF1     |  |
|  | SPTA1      | KIF3A    |  |  | TESK2      |  |
|  | COG5       | ZNF69    |  |  | UBE2J1     |  |
|  | FAM86JP    | NPM2     |  |  | CIDEB      |  |
|  | LINC00880  | FUT4     |  |  | TENT2      |  |
|  | ZDHHHC13   | TRIM4    |  |  | XPR1       |  |
|  | CNBP       | ATF4     |  |  | ATP2C1     |  |
|  | CYP2W1     | CNPPD1   |  |  | ALAD       |  |
|  | RCE1       | HERC2P2  |  |  | LINC01193  |  |

|  |                |            |  |  |           |  |
|--|----------------|------------|--|--|-----------|--|
|  | SFN            | ESS2       |  |  | TNNT1     |  |
|  | RPS16          | PGBD4      |  |  | CSE1L     |  |
|  | KSR1           | ELOVL4     |  |  | DEGS1     |  |
|  | CALM1          | TRIM7      |  |  | PIK3CD    |  |
|  | ZNF593         | B4GALT4    |  |  | DRD1      |  |
|  | TAB3           | TBC1D9     |  |  | RPS19     |  |
|  | ABHD14A        | CEP164     |  |  | CAMK2G    |  |
|  | TXNL1          | HIF1AN     |  |  | IL15RA    |  |
|  | TRIM55         | YEATS2     |  |  | DMKN      |  |
|  | EEF1A1P12      | MAP3K6     |  |  | ELFN2     |  |
|  | ARHGEF2        | RBM33      |  |  | C11orf80  |  |
|  | ALG10B         | ANKRD40    |  |  | MEIS2     |  |
|  | GNPNAT1        | IDS        |  |  | PREX1     |  |
|  | MAPK1IP1L      | ZNF548     |  |  | DHFR2     |  |
|  | COMMD9         | ZNF606     |  |  | ZNF750    |  |
|  | UBL5           | TCEAL8     |  |  | ZBED5-AS1 |  |
|  | CRYZL2P-SEC16B | NHLRC1     |  |  | LMNB1     |  |
|  | TAF5L          | NCBP2      |  |  | CENPO     |  |
|  | ATP6V1F        | MYO15B     |  |  | CLUAP1    |  |
|  | ORMDL2         | IQCA1      |  |  | TAF3      |  |
|  | HS1BP3         | KIAA1217   |  |  | HMG20A    |  |
|  | PMEP1A         | NPY1R      |  |  | FRMD8     |  |
|  | S100A16        | KRBA1      |  |  | FAM131C   |  |
|  | MYL12A         | JMJD1C-AS1 |  |  | P4HB      |  |
|  | BEND7          | MT-TW      |  |  | CDK5RAP2  |  |
|  | SIK2           | TMEM214    |  |  | YIPF6     |  |
|  | RSRC1          | CLIP4      |  |  | GAN       |  |
|  | MIB2           | MAP10      |  |  | TMEM203   |  |
|  | SLC12A8        | RNF43      |  |  | RPL13     |  |

|  |          |            |  |  |          |  |
|--|----------|------------|--|--|----------|--|
|  | POLR3H   | CYP2J2     |  |  | CCL5     |  |
|  | OSBPL9   | ANK1       |  |  | NBDY     |  |
|  | PIGX     | ZCCHC3     |  |  | CA12     |  |
|  | NUMA1    | FBXL19-AS1 |  |  | GPSM2    |  |
|  | SLC38A6  | HP1BP3     |  |  | STK38    |  |
|  | POLR2L   | LINC02328  |  |  | CPM      |  |
|  | NFRKB    | RPF2       |  |  | SORCS2   |  |
|  | YWHAE    | NKX6-1     |  |  | IGFLR1   |  |
|  | RAP1GDS1 | JMJD8      |  |  | ZNF451   |  |
|  | PCDHGC3  | FZD10-AS1  |  |  | WTAP     |  |
|  | GLRX3    | RTP3       |  |  | OSTM1    |  |
|  | GTF3C4   | NFATC3     |  |  | CPD      |  |
|  | TTC28    | MAP3K8     |  |  | PPFIA4   |  |
|  | TNK2     | SLC38A5    |  |  | SUSD4    |  |
|  | THOC2    | AP3S1      |  |  | GALNT18  |  |
|  | ABCA13   | LPAR6      |  |  | CDT1     |  |
|  | SYNJ1    | MT-TD      |  |  | CAPG     |  |
|  | RNFT1    | RBBP7      |  |  | SNX9     |  |
|  | HDAC4    | UGGT1      |  |  | PADI1    |  |
|  | ZNF622   | TMPRSS13   |  |  | ERI1     |  |
|  | SMARCAD1 | RPS5       |  |  | KATNB1   |  |
|  | PSMA7    | MVB12A     |  |  | FAR1     |  |
|  | MKLN1-AS | BMS1P23    |  |  | C16orf87 |  |
|  | C4orf47  | DIO2       |  |  | FARP2    |  |
|  | PARP1    | DEPDC7     |  |  | CFL2     |  |
|  | KRT89P   | TICAM1     |  |  | RGS19    |  |
|  | GSE1     | EDRF1      |  |  | SNTA1    |  |
|  | CAD      | EWSR1      |  |  | ISL1     |  |
|  | SAP30BP  | ADIPOR2    |  |  | CAMKK1   |  |
|  | PRDM15   | KIN        |  |  | DUXAP8   |  |

|  |           |            |  |  |         |  |
|--|-----------|------------|--|--|---------|--|
|  | POLR3B    | ZNF574     |  |  | POLR1A  |  |
|  | U2AF2     | SALL4      |  |  | MEF2A   |  |
|  | ZNF146    | GNPTAB     |  |  | NBPF9   |  |
|  | CNOT6L    | DNAI4      |  |  | FDFT1   |  |
|  | ATM       | ITPR3      |  |  | CALU    |  |
|  | C4orf48   | SCN1A-AS1  |  |  | DEF6    |  |
|  | PDIK1L    | PRMT6      |  |  | UFC1    |  |
|  | TADA3     | RAB11FIP3  |  |  | SMIM29  |  |
|  | AFAP1L1   | SHB        |  |  | COBLL1  |  |
|  | TOB1-AS1  | FMNL1-DT   |  |  | DCN     |  |
|  | STRIP1    | SERBP1     |  |  | SMU1    |  |
|  | LPAR5     | FAM53B     |  |  | CYFIP2  |  |
|  | ACOXL     | AP3M1      |  |  | UBA7    |  |
|  | KIF20B    | FBXL8      |  |  | BHMT    |  |
|  | POLR3C    | POP4       |  |  | CD99P1  |  |
|  | SNAP23    | RARG       |  |  | H3C8    |  |
|  | PAN2      | LANCL1     |  |  | MAP7    |  |
|  | PITPNM3   | NSMCE1     |  |  | CUTALP  |  |
|  | ALYREF    | ZNF462     |  |  | F12     |  |
|  | ICE1      | ERCC6      |  |  | UGT1A6  |  |
|  | LINC01686 | HCG18      |  |  | MEST    |  |
|  | PARP10    | PURPL      |  |  | HSP90B1 |  |
|  | SRF       | MKS1       |  |  | TRABD2A |  |
|  | C2CD3     | LRRC37A11P |  |  | TUBA1C  |  |
|  | TET2      | SHISAL1    |  |  | AKAP8L  |  |
|  | S100A11   | ATG9B      |  |  | ZP3     |  |
|  | TSC22D4   | CD2BP2-DT  |  |  | TXNL4B  |  |
|  | IFT20     | MMP24OS    |  |  | DDAH2   |  |
|  | AKAP6     | NIBAN1     |  |  | STAT5B  |  |
|  | ETV7-AS1  | CDH19      |  |  | HNRNPL  |  |

|  |           |          |  |  |           |  |
|--|-----------|----------|--|--|-----------|--|
|  | PIN1      | LLPH     |  |  | RLIM      |  |
|  | CNGB1     | TRAPPC10 |  |  | PLCH1     |  |
|  | STAMBP    | USP18    |  |  | NCAPG2    |  |
|  | FABP3     | ZNF195   |  |  | ICAM1     |  |
|  | RPRD2     | MOB2     |  |  | KLHL24    |  |
|  | KRCC1     | HMG2P46  |  |  | E2F1      |  |
|  | NCL       | MDC1     |  |  | MED12L    |  |
|  | EIF4E2    | CCPG1    |  |  | CTNBL1    |  |
|  | LINC00412 | SLITRK3  |  |  | ZGRF1     |  |
|  | NOSIP     | TERF2    |  |  | IRAK3     |  |
|  | CTSH      | DCAF5    |  |  | ZDBF2     |  |
|  | SFT2D2    | ZNF600   |  |  | CHMP2A    |  |
|  | ZNF678    | LYPD2    |  |  | CROCCP2   |  |
|  | ANKRD39   | ADCY7    |  |  | CALCOCO2  |  |
|  | LBX2      | GIN5     |  |  | ANKEF1    |  |
|  | SELENOK   | SLC40A1  |  |  | WASH2P    |  |
|  | MYLK-AS1  | SMARCB1  |  |  | CUL2      |  |
|  | RPL27A    | LDC1P    |  |  | UBXN6     |  |
|  | CHD7      | GRWD1    |  |  | RBL1      |  |
|  | PTAR1     | ZNF22    |  |  | DHX40     |  |
|  | MCM8      | AGBL5    |  |  | PRKG2-AS1 |  |
|  | INAVA     | CASC2    |  |  | TRERF1    |  |
|  | C1orf216  | RPS15A   |  |  | DGAT1     |  |
|  | UBE2Z     | FCF1     |  |  | MAN2B1    |  |
|  | QTRT2     | DUXAP10  |  |  | ANKMY2    |  |
|  | RAD18     | GASAL1   |  |  | GLG1      |  |
|  | SPPL2B    | LAMC2    |  |  | ZNF385A   |  |
|  | C1GALT1   | SCFD1    |  |  | FNBP1L    |  |
|  | TMEM240   | LAYN     |  |  | LGMN      |  |
|  | COL9A2    | RAF1     |  |  | MAN2A2    |  |



|  |             |             |  |  |          |  |
|--|-------------|-------------|--|--|----------|--|
|  | STXBP2      | RABL6       |  |  | AAMP     |  |
|  | FGGY        | KAT5        |  |  | CROCC    |  |
|  | STAG3L5P    | NKX2-1      |  |  | ACTR10   |  |
|  | PLA2G4D     | DCUN1D3     |  |  | MCC      |  |
|  | TXN         | HLA-V       |  |  | TM9SF4   |  |
|  | SPG11       | WIP1        |  |  | MPPED1   |  |
|  | PGP         | ZNF566-AS1  |  |  | CCDC130  |  |
|  | ZNF513      | MSH5        |  |  | BEST4    |  |
|  | FCHSD1      | ZNF706      |  |  | PAXIP1   |  |
|  | NR2C2       | CENPW       |  |  | CNNM2    |  |
|  | HERC1       | SPC24       |  |  | SATB1    |  |
|  | GLB1        | CFAP20      |  |  | RARA     |  |
|  | AZIN2       | YIPF3       |  |  | BLOC1S2  |  |
|  | MYCBP2      | ZNF502      |  |  | TLCD4    |  |
|  | NEDD4L      | MAST2       |  |  | DSTN     |  |
|  | L3MBTL2-AS1 | LRAT        |  |  | OTUD3    |  |
|  | HYAL3       | ZNF529      |  |  | STK38L   |  |
|  | SLCO6A1     | ABCA10      |  |  | COPS5    |  |
|  | GSDMD       | NIPAL4      |  |  | MAPK13   |  |
|  | ASXL2       | MIR503HG    |  |  | AP4S1    |  |
|  | LSMEM2      | QSOX2       |  |  | MAN1B1   |  |
|  | TASOR2      | SLC36A1     |  |  | UBE2M    |  |
|  | PRKDC       | MON1B       |  |  | RNH1     |  |
|  | TTC39B      | PPP1R26-AS1 |  |  | HLA-DRB1 |  |
|  | RAB34       | LRRC1       |  |  | HOXA13   |  |
|  | DNAJC7      | TBC1D8B     |  |  | OTUD5    |  |
|  | ATP6V1G1    | LATS1       |  |  | ATG13    |  |
|  | TMBIM1      | FTO         |  |  | NBPF15   |  |
|  | EXOSC5      | TMED1       |  |  | FAM110A  |  |
|  | BAZ2B       | TCIRG1      |  |  | EBLN3P   |  |

|  |           |          |  |  |          |  |
|--|-----------|----------|--|--|----------|--|
|  | SMC5      | PRX      |  |  | PTDSS1   |  |
|  | RPL36AL   | TUBBP5   |  |  | SORT1    |  |
|  | SRGAP2    | NKIRAS1  |  |  | EFR3A    |  |
|  | RPL8      | GNG4     |  |  | PDIA4    |  |
|  | CCN5      | GSK3B    |  |  | HS2ST1   |  |
|  | PDIA6     | CASQ2    |  |  | PGD      |  |
|  | ZNRF3     | SLC6A9   |  |  | AHCY     |  |
|  | FAM76A    | PIGB     |  |  | SLC39A14 |  |
|  | GADD45G   | MIR9-1HG |  |  | DEK      |  |
|  | SSH3      | RELB     |  |  | DNAAF2   |  |
|  | KNOP1     | PJVK     |  |  | ARL3     |  |
|  | SPEN      | SLCO1B7  |  |  | ZFAND6   |  |
|  | GALT      | HOXA2    |  |  | GGCX     |  |
|  | RACGAP1   | PMS1     |  |  | CXCL12   |  |
|  | MAMLD1    | WASH3P   |  |  | AP2S1    |  |
|  | SLC20A2   | C6orf223 |  |  | LARP4B   |  |
|  | KRT8P39   | CCDC8    |  |  | SLC39A3  |  |
|  | TPR       | TMEM248  |  |  | EGR1     |  |
|  | SMYD2     | SLC9A3R1 |  |  | H2AC11   |  |
|  | MIR570    | NPAS2    |  |  | FAXC     |  |
|  | C19orf53  | PCAT7    |  |  | GNG5     |  |
|  | PCBP2     | EPM2A    |  |  | LPIN2    |  |
|  | FAM3C2P   | FERMT2   |  |  | GCH1     |  |
|  | SEM1      | FBXO3    |  |  | PPP1R3G  |  |
|  | MED12     | RTL6     |  |  | COL4A2   |  |
|  | MIR590    | MAB21L4  |  |  | VPS41    |  |
|  | CBR3-AS1  | TNFRSF19 |  |  | GALK2    |  |
|  | EIF3D     | KCNT2    |  |  | ZBTB5    |  |
|  | LINC02454 | SAMD4B   |  |  | RPL13P12 |  |
|  | CIT       | ODC1     |  |  | TMEM230  |  |

|  |            |          |  |  |           |  |
|--|------------|----------|--|--|-----------|--|
|  | USP2-AS1   | ACTL10   |  |  | FAM110C   |  |
|  | TM4SF1-AS1 | IKBKB-DT |  |  | CUX1      |  |
|  | STK11IP    | NUDCD3   |  |  | VPS51     |  |
|  | CBLL1      | RGS10    |  |  | MAN1C1    |  |
|  | GATAD2B    | WASH8P   |  |  | ZNF318    |  |
|  | BHLHE40    | SUSD6    |  |  | DFFA      |  |
|  | ZWILCH     | RIPK2    |  |  | MDH1B     |  |
|  | FAU        | SELENOF  |  |  | SREBF1    |  |
|  | MAF        | DCUN1D4  |  |  | LINC02354 |  |
|  | ARSG       | DDX24    |  |  | ANXA8     |  |
|  | CIB1       | JADE3    |  |  | RPL18     |  |
|  | MYO1C      | ZWINT    |  |  | CD164     |  |
|  | ZNF546     | DNAH6    |  |  | MYPN      |  |
|  | ASAH1      | BUD13    |  |  | RPS11     |  |
|  | MFSD12     | FKBP11   |  |  | LINC01615 |  |
|  | KLHL17     | MT-TQ    |  |  | MACIR     |  |
|  | ERCC2      | IL20RB   |  |  | PPP1R12C  |  |
|  | VPS18      | CFAP43   |  |  | SPIN1     |  |
|  | CKAP2      | PLCXD1   |  |  | DEPDC5    |  |
|  | RUSC1-AS1  | GNPDA2   |  |  | SYNM      |  |
|  | KIAA0513   | NECAP2   |  |  | SLC44A2   |  |
|  | HBEGF      | CIZ1     |  |  | GSN       |  |
|  | EPS15      | DNAJB4   |  |  | GPR68     |  |
|  | POLE       | MAP1LC3A |  |  | MIR205HG  |  |
|  | DDX59      | CYP2U1   |  |  | KRT7      |  |
|  | LINC02041  | SESN1    |  |  | PAIP2B    |  |
|  | CCDC171    | CHAMP1   |  |  | INF2      |  |
|  | COPS9      | SCN3A    |  |  | RBMXL1    |  |
|  | MED31      | UBE2C    |  |  | HIRIP3    |  |
|  | ARFGEF2    | FAM181B  |  |  | EPS8L2    |  |

|  |          |             |  |  |              |  |
|--|----------|-------------|--|--|--------------|--|
|  | KLK11    | MED29       |  |  | MAP3K9       |  |
|  | ATF6     | GRN         |  |  | PPP1CB       |  |
|  | CERS5    | LINC00898   |  |  | APC          |  |
|  | PAFAH1B1 | CYP4A22-AS1 |  |  | UBE2F        |  |
|  | ZSWIM1   | UBFD1       |  |  | PPP1R14B-AS1 |  |
|  | TMEM67   | NPR1        |  |  | TEAD3        |  |
|  | ZFYVE16  | HAGHL       |  |  | CD55         |  |
|  | LIF-AS2  | APBB2       |  |  | ACVR2B       |  |
|  | SRC      | ADAM11      |  |  | FCGRT        |  |
|  | MGAT1    | PSKH1       |  |  | FAM104A      |  |
|  | PEX1     | ITFG1       |  |  | FOXK2        |  |
|  | AP4M1    | HSD17B12    |  |  | LUC7L        |  |
|  | SWT1     | REXO5       |  |  | MAPKBP1      |  |
|  | POMZP3   | ILF2        |  |  | CASP7        |  |
|  | PYCARD   | BCL11A      |  |  | ENO1         |  |
|  | EIF1AD   | BCLAF1      |  |  | RNF114       |  |
|  | FAM86DP  | EMC8        |  |  | ARHGAP17     |  |
|  | SUMO2    | DENND5A     |  |  | FCSK         |  |
|  | PDS5A    | ATP6V1A     |  |  | FBXO30       |  |
|  | CEP78    | ABHD16A     |  |  | CARD14       |  |
|  | ISY1     | NR2F6       |  |  | EMC1         |  |
|  | GNGT1    | CAMTA2      |  |  | STX2         |  |
|  | RDH11    | NEXN        |  |  | ZBTB18       |  |
|  | FITM2    | MAGEH1      |  |  | PDCD11       |  |
|  | RPS2P25  | PCOLCE2     |  |  | FIGN         |  |
|  | CYBC1    | SLC35F5     |  |  | SLC1A4       |  |
|  | TTL      | ZNF358      |  |  | GOLGA7B      |  |
|  | CEP126   | HCG27       |  |  | TTYH3        |  |
|  | ADAR     | EEF1AKNMT   |  |  | PCMT1        |  |
|  | UCK2     | RPSA        |  |  | MAP3K20      |  |

|  |           |               |  |  |           |  |
|--|-----------|---------------|--|--|-----------|--|
|  | UCHL5     | JAGN1         |  |  | CCDC88C   |  |
|  | RGS20     | EFCAB12       |  |  | CAV2      |  |
|  | ANAPC15   | SYT14         |  |  | MTMR10    |  |
|  | TPCN1     | SLC2A9        |  |  | STRIP2    |  |
|  | DERL2     | IPO13         |  |  | CNKSR1    |  |
|  | EFCAB1    | CCDC144NL-AS1 |  |  | NXN       |  |
|  | TTC7B     | USP21         |  |  | FAM98C    |  |
|  | KPNA4     | RFTN2         |  |  | KRT87P    |  |
|  | VASH1-AS1 | COPS8         |  |  | ECD       |  |
|  | DBF4      | SNX14         |  |  | GRAMD4    |  |
|  | SLC33A1   | FBXW9         |  |  | SIM2      |  |
|  | ING1      | CDHR1         |  |  | BMF       |  |
|  | TMEM218   | CTBS          |  |  | ARRDC1    |  |
|  | METTL14   | MAGEC2        |  |  | NCAPG     |  |
|  | CBFA2T3   | TLN1          |  |  | SAMD8     |  |
|  | ITGB2     | ZBTB25        |  |  | SMIM3     |  |
|  | TGFBR1    | TUBA1B        |  |  | PPP3CB    |  |
|  | CARF      | PRKCH         |  |  | RBBP6     |  |
|  | CRYM-AS1  | ADNP2         |  |  | E2F6P4    |  |
|  | UTP11     | GPR132        |  |  | RAB7B     |  |
|  | IL6       | ACTA2         |  |  | ATF3      |  |
|  | DRG1      | NEIL1         |  |  | PSMD7     |  |
|  | SMAD1     | SAPCD2        |  |  | SIRT2     |  |
|  | MPI       | SF3B5         |  |  | SLC2A10   |  |
|  | ZC3H13    | ENTPD6        |  |  | CSTF3-DT  |  |
|  | SNF8      | GSTO2         |  |  | STARD4    |  |
|  | TTC30A    | FAM171B       |  |  | MUSK      |  |
|  | NFKBIE    | STOX1         |  |  | SNRPD2    |  |
|  | LINC00886 | SH2B1         |  |  | TNFRSF10D |  |
|  | TCAF2     | CBFB          |  |  | SETD6     |  |

|  |           |           |  |  |           |  |
|--|-----------|-----------|--|--|-----------|--|
|  | LAGE3     | VPS4A     |  |  | POF1B     |  |
|  | SLC35G2   | HS6ST3    |  |  | CAMK2N1   |  |
|  | MIR3682   | PEX7      |  |  | CPE       |  |
|  | DQX1      | TUBG2     |  |  | PXDC1     |  |
|  | RPTOR     | PTAFR     |  |  | UGGT2     |  |
|  | MAK16     | TRNP1     |  |  | INPP4A    |  |
|  | RBAK      | UNC5B-AS1 |  |  | GRIN2D    |  |
|  | AGAP2-AS1 | PIAS4     |  |  | TDRKH-AS1 |  |
|  | LINC00973 | ARNTL2    |  |  | RBM38     |  |
|  | DSCC1     | RNF14     |  |  | SINHCAF   |  |
|  | ATRAID    | RAC1      |  |  | C5orf38   |  |
|  | SLC35A5   | LAMP2     |  |  | HJURP     |  |
|  | NBPF20    | TTC5      |  |  | SYT15     |  |
|  | CAPN10    | ARFGAP1   |  |  | ELOVL1    |  |
|  | CEP85L    | OGFOD3    |  |  | OPRL1     |  |
|  | FAM20B    | STARD3    |  |  | MAGEA4    |  |
|  | ST14      | PSMD5     |  |  | TTC9      |  |
|  | MEX3A     | RTRAF     |  |  | THSD4     |  |
|  | ZNF580    | LENG9     |  |  | ISG20     |  |
|  | CES4A     | ZNF710    |  |  | CDCP1     |  |
|  | RBPMS     | CBLN3     |  |  | NCOA1     |  |
|  | FAT1      | RIMS3     |  |  | SERPINB9  |  |
|  | GSPT1     | CDK9      |  |  | PLD3      |  |
|  | LTB4R     | CIAPIN1   |  |  | MFSD10    |  |
|  | AGTPBP1   | ZNF708    |  |  | ANKRD44   |  |
|  | ARRB1     | FAM21FP   |  |  | TTC21B    |  |
|  | ODAD4     | TAF1      |  |  | PMM2      |  |
|  | GOLGA6L9  | TAF15     |  |  | RAB18     |  |
|  | DPY19L4   | NAPRT     |  |  | TEF       |  |
|  | TTC23     | DHX32     |  |  | EIF2S2    |  |

|  |            |           |  |  |           |  |
|--|------------|-----------|--|--|-----------|--|
|  | RBM47      | EXOSC1    |  |  | SLC16A5   |  |
|  | PLXDC1     | SHPRH     |  |  | WDFY3-AS2 |  |
|  | TIGAR      | HEYL      |  |  | MGA       |  |
|  | POU2F3     | MTA1      |  |  | FGD5-AS1  |  |
|  | PSMB5      | SYCP2     |  |  | Y_RNA     |  |
|  | KXD1       | MT1E      |  |  | CDC42SE1  |  |
|  | PSMG3      | DYNC2I1   |  |  | CIC       |  |
|  | WNT16      | ZNF32     |  |  | TMEM87B   |  |
|  | UBE2A      | LTBP1     |  |  | SKIV2L    |  |
|  | HNRNPA1P53 | CLPTM1    |  |  | PATJ      |  |
|  | ZNF445     | SYMPK     |  |  | ATAT1     |  |
|  | HPRT1      | FST       |  |  | MARK4     |  |
|  | MIR8075    | RHEBP2    |  |  | LINC00342 |  |
|  | MIF        | KANSL3    |  |  | ZSWIM8    |  |
|  | PSMB3      | EXOC7     |  |  | LINC02762 |  |
|  | PARP11     | ZIC2      |  |  | LRATD1    |  |
|  | PECR       | LINC00997 |  |  | PHIP      |  |
|  | ZNF562     | ZC3H15    |  |  | TOM1L2    |  |
|  | LSM11      | HMGCS1    |  |  | GGA2      |  |
|  | UNC119     | ARHGAP30  |  |  | ESRRG     |  |
|  | KIAA0586   | CLTC      |  |  | NSFL1C    |  |
|  | MDM2       | CFAP70    |  |  | MCOLN2    |  |
|  | RPS6       | TTC39C    |  |  | HMGA1     |  |
|  | TMEM184C   | ICAM3     |  |  | ATP8B2    |  |
|  | NAA35      | CAPZA2    |  |  | WASHC4    |  |
|  | ATG4B      | ESYT1     |  |  | ZNF518A   |  |
|  | PHPT1      | NAA30     |  |  | HELLS     |  |
|  | ARNT2      | SOS2      |  |  | IMPACT    |  |
|  | SMIM14     | CLDN3     |  |  | SLC16A14  |  |
|  | RASSF1     | POLR3E    |  |  | ANKRD36C  |  |

|  |           |           |  |  |        |  |
|--|-----------|-----------|--|--|--------|--|
|  | ETV4      | TNRC6A    |  |  | KATNA1 |  |
|  | FOSB      | CRB3      |  |  | GJB6   |  |
|  | HIPK3     | ANKRD6    |  |  | CNOT6  |  |
|  | PSMB8-AS1 | SLC6A17   |  |  | SGK1   |  |
|  | GGNBP2    | ANAPC2    |  |  | TRIM39 |  |
|  | LEMD3     | DYNC1I1   |  |  | BEST1  |  |
|  | DOCK9     | DNAJB14   |  |  | NUCKS1 |  |
|  | GAS2L3    | IGFBP7    |  |  |        |  |
|  | CTC1      | CASQ1     |  |  |        |  |
|  | UXT       | HSPA14    |  |  |        |  |
|  | ZNF770    | FOXF2-DT  |  |  |        |  |
|  | SSNA1     | ARHGAP10  |  |  |        |  |
|  | CALM2     | NFX1      |  |  |        |  |
|  | ALKBH4    | NOP14     |  |  |        |  |
|  | FUT10     | THAP5     |  |  |        |  |
|  | HSF1      | GPR158    |  |  |        |  |
|  | AQP11     | TCF20     |  |  |        |  |
|  | GLTP      | ATXN7L3   |  |  |        |  |
|  | HERC6     | CDC42BPB  |  |  |        |  |
|  | SLC38A9   | CBS       |  |  |        |  |
|  | GRAMD1A   | EIF4G1    |  |  |        |  |
|  | UBA6      | ALDOA     |  |  |        |  |
|  | H4C14     | FOXN2     |  |  |        |  |
|  | GGA1      | ACO1      |  |  |        |  |
|  | SIRT6     | HOXC12    |  |  |        |  |
|  | UBE2D2    | NUP62     |  |  |        |  |
|  | RPS26     | SELENOT   |  |  |        |  |
|  | DNMT1     | LINC01152 |  |  |        |  |
|  | TMEM109   | PLEKHF2   |  |  |        |  |
|  | WWOX      | ZNF138    |  |  |        |  |



|  |           |            |  |  |  |  |
|--|-----------|------------|--|--|--|--|
|  | LRIG2     | AGBL2      |  |  |  |  |
|  | HSP90AA1  | SEC23IP    |  |  |  |  |
|  | SLC5A6    | CCDC74BP1  |  |  |  |  |
|  | ERN1      | MAP2K3     |  |  |  |  |
|  | NECAP1    | NCOA4      |  |  |  |  |
|  | TTLL4     | RBM23      |  |  |  |  |
|  | RYR1      | KRT222     |  |  |  |  |
|  | PGAP6     | MAP2K7     |  |  |  |  |
|  | TMA16     | IPO11      |  |  |  |  |
|  | RICTOR    | EEF1B2     |  |  |  |  |
|  | LOX       | WASH6P     |  |  |  |  |
|  | OST4      | OTUD6B-AS1 |  |  |  |  |
|  | LINC02562 | NECAB3     |  |  |  |  |
|  | GCN1      | MLLT1      |  |  |  |  |
|  | CLU       | CST6       |  |  |  |  |
|  | PSMD6     | NUMB       |  |  |  |  |
|  | ADAMTS6   | ARPC5L     |  |  |  |  |
|  | ZNF771    | MYOSLID    |  |  |  |  |
|  | IL33      | ANKLE2     |  |  |  |  |
|  | CEACAMP10 | CCDC14     |  |  |  |  |
|  | RAB3GAP2  | SLC38A4    |  |  |  |  |
|  | TLN2      | DYNC1I2    |  |  |  |  |
|  | FKBP5     | NUS1       |  |  |  |  |
|  | PI4KAP1   | POLM       |  |  |  |  |
|  | MTMR2     | PLAUR      |  |  |  |  |
|  | CHRNA1    | ZFPM2-AS1  |  |  |  |  |
|  | OR6D1P    | ILVBL      |  |  |  |  |
|  | C14orf93  | CCDC136    |  |  |  |  |
|  | BGN       | NALCN      |  |  |  |  |
|  | TXNL4A    | RANBP10    |  |  |  |  |

|  |           |            |  |  |  |  |
|--|-----------|------------|--|--|--|--|
|  | EOLA1     | UPK2       |  |  |  |  |
|  | TAF12     | CGNL1      |  |  |  |  |
|  | POLR2F    | WDR25      |  |  |  |  |
|  | HELZ2     | CLP1       |  |  |  |  |
|  | TRAPPC1   | LINC00641  |  |  |  |  |
|  | ACTN4     | SLC35A3    |  |  |  |  |
|  | MTND6P4   | TMEM72-AS1 |  |  |  |  |
|  | CNKSR3    | E2F4       |  |  |  |  |
|  | HPS3      | ETV6       |  |  |  |  |
|  | PMM1      | ZNF707     |  |  |  |  |
|  | ILK       | KREMEN2    |  |  |  |  |
|  | SGTB      | EXOC6B     |  |  |  |  |
|  | HM13      | FEM1C      |  |  |  |  |
|  | INTS2     | SRSF10     |  |  |  |  |
|  | DUSP5-DT  | DCTPP1     |  |  |  |  |
|  | H3C1      | FLRT2      |  |  |  |  |
|  | COLQ      | KCTD15     |  |  |  |  |
|  | RNF181    | TFRC       |  |  |  |  |
|  | RPS8      | UPF1       |  |  |  |  |
|  | ALG10     | VMA21      |  |  |  |  |
|  | GTF2F2    | C20orf96   |  |  |  |  |
|  | MMP10     | CNN2       |  |  |  |  |
|  | LINC00243 | OVOL1      |  |  |  |  |
|  | AP5Z1     | NSRP1      |  |  |  |  |
|  | B3GNTL1   | SIK3       |  |  |  |  |
|  | PPIP5K2   | AXL        |  |  |  |  |
|  | WDR6      | FRMD3      |  |  |  |  |
|  | YIPF1     | MTHFSD     |  |  |  |  |
|  | FANCB     | PROC       |  |  |  |  |
|  | LINC02877 | IFT172     |  |  |  |  |

|  |              |            |  |  |  |  |
|--|--------------|------------|--|--|--|--|
|  | TRAPPC12     | MOB4       |  |  |  |  |
|  | TMEM256      | PLOD1      |  |  |  |  |
|  | LAMTOR3      | DISP2      |  |  |  |  |
|  | WARS2-AS1    | PIGG       |  |  |  |  |
|  | BICD1        | ACOT1      |  |  |  |  |
|  | TMEM243      | PRPF38B    |  |  |  |  |
|  | FAN1         | DGKE       |  |  |  |  |
|  | ITGAL        | CITED2     |  |  |  |  |
|  | EXOSC4       | URI1       |  |  |  |  |
|  | KRT34        | OR2A7      |  |  |  |  |
|  | SNRNP200     | SIKE1      |  |  |  |  |
|  | APOBEC3A     | PHF3       |  |  |  |  |
|  | FAM120C      | BTD        |  |  |  |  |
|  | TNRC6B       | STAMBPL1   |  |  |  |  |
|  | CLDN22       | DNAJC18    |  |  |  |  |
|  | C9orf85      | CLDN4      |  |  |  |  |
|  | DPH2         | KCNK15-AS1 |  |  |  |  |
|  | MAST4-AS1    | DDX50      |  |  |  |  |
|  | TMED8        | ADGRF5     |  |  |  |  |
|  | OFD1         | FBXO5      |  |  |  |  |
|  | AKAP11       | DYNLL2     |  |  |  |  |
|  | C10orf95-AS1 | RSBN1      |  |  |  |  |
|  | PLCXD2       | ZRANB2     |  |  |  |  |
|  | PTGES        | AGGF1P2    |  |  |  |  |
|  | TMCO1        | PLPP1      |  |  |  |  |
|  | ITPR2        | VANGL1     |  |  |  |  |
|  | CD93         | TMEM62     |  |  |  |  |
|  | TGFBRAP1     | BRF1       |  |  |  |  |
|  | GET3         | WDR47      |  |  |  |  |
|  | TXNDC9       | MGAT5B     |  |  |  |  |

|  |           |            |  |  |  |  |
|--|-----------|------------|--|--|--|--|
|  | COMMD2    | ZFAND4     |  |  |  |  |
|  | RPL7P49   | ZNF544     |  |  |  |  |
|  | WDR91     | MAGEA6     |  |  |  |  |
|  | MBIP      | LINC01389  |  |  |  |  |
|  | NEMP1     | CYP7B1     |  |  |  |  |
|  | ATP2C2    | KRT23      |  |  |  |  |
|  | SELL      | SCLT1      |  |  |  |  |
|  | DDX41     | DDHD1      |  |  |  |  |
|  | PDZD11    | PTPN21     |  |  |  |  |
|  | XRCC5     | TDO2       |  |  |  |  |
|  | RNPEPL1   | HSPA12A    |  |  |  |  |
|  | RPL19     | DPH6-DT    |  |  |  |  |
|  | TCOF1     | NEURL1B    |  |  |  |  |
|  | USO1      | ITPRID2    |  |  |  |  |
|  | CCDC125   | RAB27A     |  |  |  |  |
|  | KIF3B     | WNT10A     |  |  |  |  |
|  | CFAP221   | ASB2       |  |  |  |  |
|  | CSAD      | HABP4      |  |  |  |  |
|  | NFAT5     | CARD8-AS1  |  |  |  |  |
|  | TOP2B     | PILRB      |  |  |  |  |
|  | LITAF     | GRHL1      |  |  |  |  |
|  | MIR2117HG | ATP1A1-AS1 |  |  |  |  |
|  | SLC24A2   | ZFHX2      |  |  |  |  |
|  | FARSB     | CCT7       |  |  |  |  |
|  | LINC01503 | ZNF107     |  |  |  |  |
|  | PIK3R4    | ATF5       |  |  |  |  |
|  | FAT4      | UHRF1      |  |  |  |  |
|  | MAML3     | RAB12      |  |  |  |  |
|  | NHLRC2    | HMGB1P1    |  |  |  |  |
|  | DDAH1     | DNAJC16    |  |  |  |  |

|  |            |          |  |  |  |  |
|--|------------|----------|--|--|--|--|
|  | AKAP9      | CASKIN2  |  |  |  |  |
|  | GGT7       | SRM      |  |  |  |  |
|  | RPL21      | ZKSCAN2  |  |  |  |  |
|  | ATP6AP2    | PGAP2    |  |  |  |  |
|  | MOCOS      | GFUS     |  |  |  |  |
|  | DSE        | PRR15L   |  |  |  |  |
|  | C18orf54   | FSD1     |  |  |  |  |
|  | SCGB2B2    | WNT3     |  |  |  |  |
|  | TSEN34     | LRP11    |  |  |  |  |
|  | NMRAL1     | TMEM117  |  |  |  |  |
|  | SLC25A47P1 | ANGPTL4  |  |  |  |  |
|  | LRRC73     | C2CD2    |  |  |  |  |
|  | SNORD17    | ENGASE   |  |  |  |  |
|  | RDH10      | PNPLA3   |  |  |  |  |
|  | C1orf112   | B3GNT2   |  |  |  |  |
|  | NECTIN4    | ANO1-AS1 |  |  |  |  |
|  | PLEKHA5    | DUSP5P1  |  |  |  |  |
|  | MSANTD3    | FAR2P1   |  |  |  |  |
|  | CD52       | MIOS     |  |  |  |  |
|  | RNF207-AS1 | FZD4     |  |  |  |  |
|  | POLD4      | YARS1    |  |  |  |  |
|  | FLJ31356   | OSER1-DT |  |  |  |  |
|  | SLMAP      | ATP2A2   |  |  |  |  |
|  | NLK        | CPEB3    |  |  |  |  |
|  | MED30      | FAM241A  |  |  |  |  |
|  | LINC02606  | ZNF33A   |  |  |  |  |
|  | LINC02747  | FAM168B  |  |  |  |  |
|  | ALG6       | MAT1A    |  |  |  |  |
|  | RPL24      | FER      |  |  |  |  |
|  | HAUS2      | CDK16    |  |  |  |  |

|  |             |             |  |  |  |  |
|--|-------------|-------------|--|--|--|--|
|  | SLC3A2      | RAB11FIP2   |  |  |  |  |
|  | TRPT1       | FKBP9       |  |  |  |  |
|  | CSGALNACT1  | OGFRP1      |  |  |  |  |
|  | EMC6        | HSPA6       |  |  |  |  |
|  | ATF7IP      | PIK3C2B     |  |  |  |  |
|  | SRI         | NAPG        |  |  |  |  |
|  | SART3       | ZNF497      |  |  |  |  |
|  | POC5        | PANK3       |  |  |  |  |
|  | EID2        | DAB2        |  |  |  |  |
|  | DGKD        | PI4K2A      |  |  |  |  |
|  | PRB3        | LINC01315   |  |  |  |  |
|  | ENTPD1-AS1  | ADSS1       |  |  |  |  |
|  | XRN1        | ZFP92       |  |  |  |  |
|  | MARCHF6     | TMED10P2    |  |  |  |  |
|  | IGF2BP3     | C3orf80     |  |  |  |  |
|  | CFAP157     | CAPN15      |  |  |  |  |
|  | LINC01416   | RAPGEFL1    |  |  |  |  |
|  | NF1         | USF1        |  |  |  |  |
|  | CNDP2       | CBX7        |  |  |  |  |
|  | ANKRD10-IT1 | RAB20       |  |  |  |  |
|  | FNBP4       | MAP2K5      |  |  |  |  |
|  | ZNF41       | ZBTB40      |  |  |  |  |
|  | LINC01990   | MYO10       |  |  |  |  |
|  | TNNC2       | POGLUT2     |  |  |  |  |
|  | LINC00707   | LINC01116   |  |  |  |  |
|  | POT1-AS1    | TAS2R4      |  |  |  |  |
|  | TBCA        | ZSCAN16-AS1 |  |  |  |  |
|  | TMA7        | SCAF8       |  |  |  |  |
|  | ADAMTSL1    | SNHG4       |  |  |  |  |
|  | TBC1D2B     | LRRIQ1      |  |  |  |  |

|  |            |           |  |  |  |  |
|--|------------|-----------|--|--|--|--|
|  | SGO2       | ACVR2A    |  |  |  |  |
|  | IQCK       | HOXC13    |  |  |  |  |
|  | FAM3B      | SGCB      |  |  |  |  |
|  | ARFIP2     | NFKB1     |  |  |  |  |
|  | MAP3K4-AS1 | ANKRD18B  |  |  |  |  |
|  | C1RL-AS1   | MFSD5     |  |  |  |  |
|  | DNPH1      | TCHH      |  |  |  |  |
|  | FYCO1      | TRIM28    |  |  |  |  |
|  | SYF2       | DDX6      |  |  |  |  |
|  | KLF3       | PI3       |  |  |  |  |
|  | KIF20A     | YPEL1     |  |  |  |  |
|  | LIG1       | SMPDL3A   |  |  |  |  |
|  | SPEG       | RPP25     |  |  |  |  |
|  | OSBPL8     | ILRUN-AS1 |  |  |  |  |
|  | CAVIN3     | MR1       |  |  |  |  |
|  | MED7       | CCNI      |  |  |  |  |
|  | SMYD4      | TAOK2     |  |  |  |  |
|  | PPIAP72    | ERP27     |  |  |  |  |
|  | XYLB       | PACSIN3   |  |  |  |  |
|  | ZMIZ2      | TUSC3     |  |  |  |  |
|  | LINC00630  | DPF2      |  |  |  |  |
|  | PDCL3      | LEMD1     |  |  |  |  |
|  | SUCO       | KAT2A     |  |  |  |  |
|  | TERT       | TGIF1     |  |  |  |  |
|  | CAMSAP1    | LINC01269 |  |  |  |  |
|  | SNRPA      | PHYHIP    |  |  |  |  |
|  | H2AJ       | TENT5B    |  |  |  |  |
|  | ANKRD54    | FBXO31    |  |  |  |  |
|  | NRDE2      | UGT1A12P  |  |  |  |  |
|  | TMEM161B-  | THBS3     |  |  |  |  |

|  |           |             |  |  |  |  |
|--|-----------|-------------|--|--|--|--|
|  | AS1       |             |  |  |  |  |
|  | NT5C      | CASP1P2     |  |  |  |  |
|  | DVL2      | USP32       |  |  |  |  |
|  | DSG3      | ECPAS       |  |  |  |  |
|  | LMBRD2    | LYN         |  |  |  |  |
|  | MFSD3     | SDCBP2-AS1  |  |  |  |  |
|  | DNM1P51   | LRRC49      |  |  |  |  |
|  | ZC3H7B    | IPO5P1      |  |  |  |  |
|  | MIR3936HG | HNRNPM      |  |  |  |  |
|  | CNTNAP3B  | AGO3        |  |  |  |  |
|  | PSMA4     | ATP6V0A1    |  |  |  |  |
|  | ASAP1     | C22orf39    |  |  |  |  |
|  | XAF1      | GPR155      |  |  |  |  |
|  | EVI2B     | PCNX2       |  |  |  |  |
|  | HOXA5     | PIK3R1      |  |  |  |  |
|  | FAM183A   | SMARCA4     |  |  |  |  |
|  | PDE4DIPP2 | MYO5A       |  |  |  |  |
|  | PELI1     | RAB8A       |  |  |  |  |
|  | ZBP1      | POTEE       |  |  |  |  |
|  | HACD3     | NIFK        |  |  |  |  |
|  | UOX       | STIM2       |  |  |  |  |
|  | FTH1P16   | ZNF638      |  |  |  |  |
|  | C19orf25  | MICA        |  |  |  |  |
|  | EOLA2     | FADS6       |  |  |  |  |
|  | PMS2P1    | PORCN       |  |  |  |  |
|  | CCNQ      | ZNF354B     |  |  |  |  |
|  | ABCC6P2   | ZNF586      |  |  |  |  |
|  | MIP       | ANKRD20A18P |  |  |  |  |
|  | SSH2      | ARHGAP39    |  |  |  |  |
|  | PNRC2     | ZNF180      |  |  |  |  |



|  |           |            |  |  |  |  |
|--|-----------|------------|--|--|--|--|
|  | RERE-AS1  | NFKBID     |  |  |  |  |
|  | SMARCA2   | CHUK       |  |  |  |  |
|  | OAZ2      | NUDT16     |  |  |  |  |
|  | CLCN4     | TBKBP1     |  |  |  |  |
|  | FUT8-AS1  | FCHO2      |  |  |  |  |
|  | LMF2      | SDCBP2     |  |  |  |  |
|  | PPP1R13L  | TMEM200A   |  |  |  |  |
|  | B4GALNT2  | CYS1       |  |  |  |  |
|  | PPIAP46   | MED25      |  |  |  |  |
|  | RNASEH2B  | MAN1A2     |  |  |  |  |
|  | C11orf72  | DROSHA     |  |  |  |  |
|  | NT5C3A    | ABHD5      |  |  |  |  |
|  | ZNF337    | TGFBR2     |  |  |  |  |
|  | TRANK1    | KLHL21     |  |  |  |  |
|  | WDR7      | WDR54      |  |  |  |  |
|  | CKAP4     | NPEPPSP1   |  |  |  |  |
|  | RPAP1     | UBXN11     |  |  |  |  |
|  | TMEM238   | SOAT1      |  |  |  |  |
|  | KIF18B    | ABCA5      |  |  |  |  |
|  | WWP1      | CCDC9B     |  |  |  |  |
|  | HYKK      | TNFAIP8L1  |  |  |  |  |
|  | KLHL23    | TPX2       |  |  |  |  |
|  | FLYWCH1   | CAPN5      |  |  |  |  |
|  | SEC13     | TXNDC5     |  |  |  |  |
|  | FKBP9P1   | REEP6      |  |  |  |  |
|  | TMEM158   | WFDC10B    |  |  |  |  |
|  | PCNX1     | METTL22    |  |  |  |  |
|  | TBCCD1    | SNRPD3     |  |  |  |  |
|  | JKAMP     | SNAPC3     |  |  |  |  |
|  | LINC00184 | GABPB1-IT1 |  |  |  |  |

|  |           |           |  |  |  |  |
|--|-----------|-----------|--|--|--|--|
|  | MIER2     | NLRP1     |  |  |  |  |
|  | CFAP53    | KLHDC9    |  |  |  |  |
|  | STPG1     | CFAP251   |  |  |  |  |
|  | NUDT15    | PTGS1     |  |  |  |  |
|  | TMEM131L  | PANX1     |  |  |  |  |
|  | PHC3      | FBXO28    |  |  |  |  |
|  | LASP1     | ARPC1B    |  |  |  |  |
|  | ERVFRD-3  | GLA       |  |  |  |  |
|  | FADS3     | TRIM37    |  |  |  |  |
|  | HSBP1     | ZDHHC16   |  |  |  |  |
|  | CCDC138   | DHRS11    |  |  |  |  |
|  | TEAD1     | NDFIP2    |  |  |  |  |
|  | KIDINS220 | PTPN3     |  |  |  |  |
|  | RPS15     | MEA1      |  |  |  |  |
|  | KIAA1841  | PTGIS     |  |  |  |  |
|  | TBL1XR1   | RASAL1    |  |  |  |  |
|  | EIF6      | RTL8A     |  |  |  |  |
|  | RBMS1     | RDX       |  |  |  |  |
|  | MIR4664   | LRRC28    |  |  |  |  |
|  | RALA      | PABPN1    |  |  |  |  |
|  | KRT32     | PSRC1     |  |  |  |  |
|  | HERC2     | ELOVL5    |  |  |  |  |
|  | URB2      | FKBP4     |  |  |  |  |
|  | RBM28     | PPP1R3E   |  |  |  |  |
|  | S100A10   | SH2D3C    |  |  |  |  |
|  | ZNF326    | RNF130    |  |  |  |  |
|  | PLA2G6    | IL21R     |  |  |  |  |
|  | PSME4     | PTOV1-AS2 |  |  |  |  |
|  | TRIM69    | RPL23AP53 |  |  |  |  |
|  | HECTD1    | NPL       |  |  |  |  |

|  |        |             |  |  |  |  |
|--|--------|-------------|--|--|--|--|
|  | POLR2J | LPXN        |  |  |  |  |
|  | TTYH2  | HSD17B1-AS1 |  |  |  |  |
|  |        | SYT1        |  |  |  |  |
|  |        | ARL4C       |  |  |  |  |
|  |        | SUN2        |  |  |  |  |
|  |        | IP6K1       |  |  |  |  |
|  |        | FAM169A     |  |  |  |  |
|  |        | HOXB1       |  |  |  |  |
|  |        | KDM6A       |  |  |  |  |
|  |        | GABRE       |  |  |  |  |
|  |        | AQP7P1      |  |  |  |  |
|  |        | PVT1        |  |  |  |  |
|  |        | CEP104      |  |  |  |  |
|  |        | FAM117A     |  |  |  |  |
|  |        | EGLN3       |  |  |  |  |
|  |        | ABCG1       |  |  |  |  |
|  |        | MCM10       |  |  |  |  |
|  |        | FOSL1       |  |  |  |  |
|  |        | PLA2R1      |  |  |  |  |
|  |        | ZNF772      |  |  |  |  |
|  |        | KRT6C       |  |  |  |  |
|  |        | RTKN        |  |  |  |  |
|  |        | EIF3G       |  |  |  |  |
|  |        | KCTD5       |  |  |  |  |
|  |        | VWA1        |  |  |  |  |
|  |        | ASF1B       |  |  |  |  |
|  |        | HEATR3      |  |  |  |  |
|  |        | UNK         |  |  |  |  |
|  |        | ADGRG1      |  |  |  |  |
|  |        | ERI2        |  |  |  |  |

|  |  |               |  |  |  |  |
|--|--|---------------|--|--|--|--|
|  |  | RPL28         |  |  |  |  |
|  |  | METTL2B       |  |  |  |  |
|  |  | FZD6          |  |  |  |  |
|  |  | ANO9          |  |  |  |  |
|  |  | MAMDC4        |  |  |  |  |
|  |  | CNTN6         |  |  |  |  |
|  |  | FJX1          |  |  |  |  |
|  |  | PSMB8         |  |  |  |  |
|  |  | KDM2B         |  |  |  |  |
|  |  | TLK1          |  |  |  |  |
|  |  | RPP25L        |  |  |  |  |
|  |  | COG6          |  |  |  |  |
|  |  | KCTD18        |  |  |  |  |
|  |  | H2BC15        |  |  |  |  |
|  |  | PPP2CB        |  |  |  |  |
|  |  | B4GALT2       |  |  |  |  |
|  |  | C5orf66-AS1   |  |  |  |  |
|  |  | APCDD1        |  |  |  |  |
|  |  | USP31         |  |  |  |  |
|  |  | DCUN1D1       |  |  |  |  |
|  |  | IQCG          |  |  |  |  |
|  |  | ZMPSTE24      |  |  |  |  |
|  |  | CABLES1       |  |  |  |  |
|  |  | EPOP          |  |  |  |  |
|  |  | ENTPD3        |  |  |  |  |
|  |  | CCNT2-AS1     |  |  |  |  |
|  |  | NINJ2         |  |  |  |  |
|  |  | FAM66C        |  |  |  |  |
|  |  | CSGALNACT2-DT |  |  |  |  |
|  |  | HMG2          |  |  |  |  |

|  |  |           |  |  |  |  |
|--|--|-----------|--|--|--|--|
|  |  | SNX6      |  |  |  |  |
|  |  | FAM117B   |  |  |  |  |
|  |  | RTN4      |  |  |  |  |
|  |  | C1QTNF1   |  |  |  |  |
|  |  | SUPT6H    |  |  |  |  |
|  |  | KCMF1     |  |  |  |  |
|  |  | HASPIN    |  |  |  |  |
|  |  | RAD51B    |  |  |  |  |
|  |  | LINC02635 |  |  |  |  |
|  |  | TCTN1     |  |  |  |  |
|  |  | PPRC1     |  |  |  |  |
|  |  | CLN5      |  |  |  |  |
|  |  | TRMT10A   |  |  |  |  |
|  |  | BMP2K     |  |  |  |  |
|  |  | PHC2      |  |  |  |  |
|  |  | SON       |  |  |  |  |
|  |  | ZNF268    |  |  |  |  |
|  |  | RNF10     |  |  |  |  |
|  |  | DUSP12    |  |  |  |  |
|  |  | CKMT2-AS1 |  |  |  |  |
|  |  | LINC02035 |  |  |  |  |
|  |  | ENKD1     |  |  |  |  |
|  |  | DBNDD2    |  |  |  |  |
|  |  | RAB43     |  |  |  |  |
|  |  | SOCS2     |  |  |  |  |
|  |  | C12orf57  |  |  |  |  |
|  |  | FTLP3     |  |  |  |  |
|  |  | ADCY9     |  |  |  |  |
|  |  | NBEAL2    |  |  |  |  |
|  |  | WDTC1     |  |  |  |  |

|  |  |            |  |  |  |  |
|--|--|------------|--|--|--|--|
|  |  | MYBL2      |  |  |  |  |
|  |  | YPEL4      |  |  |  |  |
|  |  | PLPP3      |  |  |  |  |
|  |  | DIP2A      |  |  |  |  |
|  |  | KCTD6      |  |  |  |  |
|  |  | ZNF749     |  |  |  |  |
|  |  | DYM        |  |  |  |  |
|  |  | ICAM5      |  |  |  |  |
|  |  | BMS1P2     |  |  |  |  |
|  |  | ORAI2      |  |  |  |  |
|  |  | ANKRD26    |  |  |  |  |
|  |  | ZNF529-AS1 |  |  |  |  |
|  |  | ID4        |  |  |  |  |
|  |  | CD302      |  |  |  |  |
|  |  | FAF2       |  |  |  |  |
|  |  | LCMT2      |  |  |  |  |
|  |  | WFIKKN1    |  |  |  |  |
|  |  | AGPS       |  |  |  |  |
|  |  | MGRN1      |  |  |  |  |
|  |  | RAB11A     |  |  |  |  |
|  |  | FAM131B    |  |  |  |  |
|  |  | EEA1       |  |  |  |  |
|  |  | DLX2       |  |  |  |  |
|  |  | PPP3R1     |  |  |  |  |
|  |  | GPX2       |  |  |  |  |
|  |  | MUC4       |  |  |  |  |
|  |  | HAP1       |  |  |  |  |
|  |  | RNF217     |  |  |  |  |
|  |  | POGLUT3    |  |  |  |  |
|  |  | IRF6       |  |  |  |  |

|  |  |           |  |  |  |  |
|--|--|-----------|--|--|--|--|
|  |  | PPP1R21   |  |  |  |  |
|  |  | GNA11     |  |  |  |  |
|  |  | TRAM1L1   |  |  |  |  |
|  |  | OR2A1-AS1 |  |  |  |  |
|  |  | GCC1      |  |  |  |  |
|  |  | B4GAT1    |  |  |  |  |
|  |  | RNF216    |  |  |  |  |
|  |  | SP100     |  |  |  |  |
|  |  | CDHR3     |  |  |  |  |
|  |  | SUSD3     |  |  |  |  |
|  |  | SFT2D1    |  |  |  |  |
|  |  | TTLL10    |  |  |  |  |
|  |  | RAPGEF6   |  |  |  |  |
|  |  | GTDC1     |  |  |  |  |
|  |  | FIBP      |  |  |  |  |
|  |  | TEDC1     |  |  |  |  |
|  |  | SMC3      |  |  |  |  |
|  |  | VCL       |  |  |  |  |
|  |  | SEC62     |  |  |  |  |
|  |  | LINC01882 |  |  |  |  |
|  |  | NHSL1     |  |  |  |  |
|  |  | AURKA     |  |  |  |  |
|  |  | DBP       |  |  |  |  |
|  |  | IFT52     |  |  |  |  |
|  |  | RAB30     |  |  |  |  |
|  |  | ITGB8     |  |  |  |  |
|  |  | DNAAF1    |  |  |  |  |
|  |  | PLGLB1    |  |  |  |  |
|  |  | PDPK1     |  |  |  |  |
|  |  | N4BP1     |  |  |  |  |

|  |  |           |  |  |  |  |
|--|--|-----------|--|--|--|--|
|  |  | C20orf197 |  |  |  |  |
|  |  | RHOU      |  |  |  |  |
|  |  | TP53I13   |  |  |  |  |
|  |  | CFAP69    |  |  |  |  |
|  |  | SNX21     |  |  |  |  |
|  |  | LINC00944 |  |  |  |  |
|  |  | IFT140    |  |  |  |  |
|  |  | ARHGEF34P |  |  |  |  |
|  |  | ABCA1     |  |  |  |  |
|  |  | CHAF1A    |  |  |  |  |
|  |  | SPSB3     |  |  |  |  |
|  |  | TRAK1     |  |  |  |  |
|  |  | SLC45A4   |  |  |  |  |
|  |  | RUFY2     |  |  |  |  |
|  |  | KIAA1549  |  |  |  |  |
|  |  | SYT11     |  |  |  |  |
|  |  | LRRC14    |  |  |  |  |
|  |  | CTSO      |  |  |  |  |
|  |  | ZCCHC8    |  |  |  |  |
|  |  | TSPYL2    |  |  |  |  |
|  |  | ZC2HC1C   |  |  |  |  |
|  |  | RPL32     |  |  |  |  |
|  |  | RAB11B    |  |  |  |  |
|  |  | HMGB2     |  |  |  |  |
|  |  | TMOD3     |  |  |  |  |
|  |  | PNISR     |  |  |  |  |
|  |  | WDR5      |  |  |  |  |
|  |  | PKDCC     |  |  |  |  |
|  |  | CUL9      |  |  |  |  |
|  |  | TMPRSS11A |  |  |  |  |



|  |  |              |  |  |  |  |
|--|--|--------------|--|--|--|--|
|  |  | SNX1         |  |  |  |  |
|  |  | GIHCG        |  |  |  |  |
|  |  | UBE2W        |  |  |  |  |
|  |  | ZSCAN9       |  |  |  |  |
|  |  | ARHGAP25     |  |  |  |  |
|  |  | AAR2         |  |  |  |  |
|  |  | LHPP         |  |  |  |  |
|  |  | VAV2         |  |  |  |  |
|  |  | SNORA33      |  |  |  |  |
|  |  | LINC02551    |  |  |  |  |
|  |  | MARF1        |  |  |  |  |
|  |  | EDC3         |  |  |  |  |
|  |  | MAFG-DT      |  |  |  |  |
|  |  | FAIM         |  |  |  |  |
|  |  | DTWD2        |  |  |  |  |
|  |  | PPP1R3C      |  |  |  |  |
|  |  | ARHGEF35-AS1 |  |  |  |  |
|  |  | OR2A20P      |  |  |  |  |
|  |  | PRC1         |  |  |  |  |
|  |  | PBX1         |  |  |  |  |
|  |  | LINC01451    |  |  |  |  |
|  |  | GRB10        |  |  |  |  |
|  |  | TVP23B       |  |  |  |  |
|  |  | VKORC1       |  |  |  |  |
|  |  | SULT1A2      |  |  |  |  |
|  |  | MADD         |  |  |  |  |
|  |  | POLR1F       |  |  |  |  |
|  |  | ITPA         |  |  |  |  |
|  |  | LRRC37B      |  |  |  |  |
|  |  | HOMER1       |  |  |  |  |

|  |  |             |  |  |  |  |
|--|--|-------------|--|--|--|--|
|  |  | MIA2        |  |  |  |  |
|  |  | TEX21P      |  |  |  |  |
|  |  | TES         |  |  |  |  |
|  |  | RHNO1       |  |  |  |  |
|  |  | ATP13A1     |  |  |  |  |
|  |  | GAREM2      |  |  |  |  |
|  |  | ZBTB42      |  |  |  |  |
|  |  | ZNF611      |  |  |  |  |
|  |  | ZNF699      |  |  |  |  |
|  |  | CARNMT1     |  |  |  |  |
|  |  | NXNL2       |  |  |  |  |
|  |  | EVC         |  |  |  |  |
|  |  | CDC42EP5    |  |  |  |  |
|  |  | CP          |  |  |  |  |
|  |  | ABCC2       |  |  |  |  |
|  |  | C5orf15     |  |  |  |  |
|  |  | RPS17       |  |  |  |  |
|  |  | PEDS1       |  |  |  |  |
|  |  | VSIG1       |  |  |  |  |
|  |  | GABARAP     |  |  |  |  |
|  |  | TMEM167B-DT |  |  |  |  |
|  |  | SH3BP5L     |  |  |  |  |
|  |  | CACNB3      |  |  |  |  |
|  |  | TMEM107     |  |  |  |  |
|  |  | TATDN1      |  |  |  |  |
|  |  | TOX2        |  |  |  |  |
|  |  | LY6G5B      |  |  |  |  |
|  |  | B4GALNT3    |  |  |  |  |
|  |  | ZNF654      |  |  |  |  |
|  |  | C11orf1     |  |  |  |  |

|  |  |           |  |  |  |  |
|--|--|-----------|--|--|--|--|
|  |  | LINC00653 |  |  |  |  |
|  |  | LIX1L     |  |  |  |  |
|  |  | EIF2S1    |  |  |  |  |
|  |  | TWF2      |  |  |  |  |
|  |  | SH2D2A    |  |  |  |  |
|  |  | KIAA1191  |  |  |  |  |
|  |  | PRR14L    |  |  |  |  |
|  |  | KMT2B     |  |  |  |  |
|  |  | RN7SL541P |  |  |  |  |
|  |  | LINC02005 |  |  |  |  |
|  |  | CCL22     |  |  |  |  |
|  |  | C12orf54  |  |  |  |  |
|  |  | RPS18P9   |  |  |  |  |
|  |  | DCAF15    |  |  |  |  |
|  |  | SEPTIN2   |  |  |  |  |
|  |  | MARCHF9   |  |  |  |  |
|  |  | SNX18P7   |  |  |  |  |
|  |  | SLC2A13   |  |  |  |  |
|  |  | RHBDD3    |  |  |  |  |
|  |  | MYLK      |  |  |  |  |
|  |  | EPS8L1    |  |  |  |  |
|  |  | ZDHHC2    |  |  |  |  |
|  |  | LENG8     |  |  |  |  |
|  |  | SPAG17    |  |  |  |  |
|  |  | CLDN9     |  |  |  |  |
|  |  | SPAG9     |  |  |  |  |
|  |  | HSD17B11  |  |  |  |  |
|  |  | ROCK1     |  |  |  |  |
|  |  | ACE2      |  |  |  |  |
|  |  | EMILIN2   |  |  |  |  |

|  |  |            |  |  |  |  |
|--|--|------------|--|--|--|--|
|  |  | ZBED1      |  |  |  |  |
|  |  | TBC1D10A   |  |  |  |  |
|  |  | PTPA       |  |  |  |  |
|  |  | PLXNB3     |  |  |  |  |
|  |  | GCLC       |  |  |  |  |
|  |  | UIMC1      |  |  |  |  |
|  |  | TRPC4AP    |  |  |  |  |
|  |  | GNPDA1     |  |  |  |  |
|  |  | LINC02767  |  |  |  |  |
|  |  | CCAR1      |  |  |  |  |
|  |  | ACSL4      |  |  |  |  |
|  |  | TBCD       |  |  |  |  |
|  |  | ZNF665     |  |  |  |  |
|  |  | TNPO2      |  |  |  |  |
|  |  | KMT2C      |  |  |  |  |
|  |  | PACC1      |  |  |  |  |
|  |  | RAET1E-AS1 |  |  |  |  |
|  |  | TACC3      |  |  |  |  |
|  |  | ZSCAN23    |  |  |  |  |
|  |  | HRH1       |  |  |  |  |
|  |  | TMEM9B     |  |  |  |  |
|  |  | PLA2G4F    |  |  |  |  |
|  |  | TMEM14B    |  |  |  |  |
|  |  | GPR1       |  |  |  |  |
|  |  | MAP3K2-DT  |  |  |  |  |
|  |  | TNPO1      |  |  |  |  |
|  |  | CMBL       |  |  |  |  |
|  |  | C2         |  |  |  |  |
|  |  | GTF2E2     |  |  |  |  |
|  |  | PRIM2      |  |  |  |  |

|  |  |          |  |  |  |  |
|--|--|----------|--|--|--|--|
|  |  | KIAA0825 |  |  |  |  |
|  |  | KRT40    |  |  |  |  |
|  |  | ZNF239   |  |  |  |  |
|  |  | NEK11    |  |  |  |  |
|  |  | CDADC1   |  |  |  |  |
|  |  | MT-TE    |  |  |  |  |
|  |  | ZNF436   |  |  |  |  |
|  |  | ATXN7L1  |  |  |  |  |
|  |  | TTC21A   |  |  |  |  |
|  |  | SAPCD1   |  |  |  |  |
|  |  | UBAP2    |  |  |  |  |
|  |  | TNIP1    |  |  |  |  |
|  |  | DBF4B    |  |  |  |  |
|  |  | ZNF354A  |  |  |  |  |
|  |  | MTMR6    |  |  |  |  |
|  |  | RNF38    |  |  |  |  |
|  |  | SOX2     |  |  |  |  |
|  |  | C12orf29 |  |  |  |  |
|  |  | CIRBP    |  |  |  |  |
|  |  | SUGP2    |  |  |  |  |
|  |  | P2RX4    |  |  |  |  |
|  |  | XRCC3    |  |  |  |  |
|  |  | FABP6    |  |  |  |  |
|  |  | IL36RN   |  |  |  |  |
|  |  | NF1P1    |  |  |  |  |
|  |  | TCAM1P   |  |  |  |  |
|  |  | HSD11B2  |  |  |  |  |
|  |  | PRPF8    |  |  |  |  |
|  |  | EN1      |  |  |  |  |
|  |  | HEATR4   |  |  |  |  |

|  |  |          |  |  |  |  |
|--|--|----------|--|--|--|--|
|  |  | MYH9     |  |  |  |  |
|  |  | SOAT2    |  |  |  |  |
|  |  | MPHOSPH8 |  |  |  |  |
|  |  | SOX7     |  |  |  |  |
|  |  | SEC31B   |  |  |  |  |
|  |  | SEMA4B   |  |  |  |  |
|  |  | GPR108   |  |  |  |  |
|  |  | HENMT1   |  |  |  |  |
|  |  | LPIN3    |  |  |  |  |
|  |  | DUSP2    |  |  |  |  |
|  |  | FCHO2-DT |  |  |  |  |
|  |  | CHP1     |  |  |  |  |
|  |  | CCDC74A  |  |  |  |  |
|  |  | RFLNB    |  |  |  |  |
|  |  | TMUB2    |  |  |  |  |
|  |  | PEX11G   |  |  |  |  |
|  |  | ZNF56    |  |  |  |  |
|  |  | LONP2    |  |  |  |  |
|  |  | SNHG1    |  |  |  |  |
|  |  | RAB5A    |  |  |  |  |
|  |  | PIMREG   |  |  |  |  |
|  |  | MAPKAPK3 |  |  |  |  |
|  |  | INKA2    |  |  |  |  |
|  |  | ITGB7    |  |  |  |  |
|  |  | TMOD2    |  |  |  |  |
|  |  | U2AF1L4  |  |  |  |  |
|  |  | DANCR    |  |  |  |  |
|  |  | POLR1B   |  |  |  |  |
|  |  | TBX3     |  |  |  |  |
|  |  | ZNF639   |  |  |  |  |

|  |  |          |  |  |  |  |
|--|--|----------|--|--|--|--|
|  |  | CEP20    |  |  |  |  |
|  |  | SPTB     |  |  |  |  |
|  |  | PGLS     |  |  |  |  |
|  |  | SLC16A8  |  |  |  |  |
|  |  | TM2D1    |  |  |  |  |
|  |  | LURAP1L  |  |  |  |  |
|  |  | MIR1282  |  |  |  |  |
|  |  | P2RX6    |  |  |  |  |
|  |  | NAT10    |  |  |  |  |
|  |  | ANKRD13C |  |  |  |  |
|  |  | MIR4666A |  |  |  |  |
|  |  | COL8A2   |  |  |  |  |
|  |  | SRP72    |  |  |  |  |
|  |  | TESK1    |  |  |  |  |
|  |  | TMX3     |  |  |  |  |
|  |  | DNAJC24  |  |  |  |  |
|  |  | PIH1D1   |  |  |  |  |
|  |  | RPN2     |  |  |  |  |
|  |  | PRTFDC1  |  |  |  |  |
|  |  | LIN7C    |  |  |  |  |
|  |  | RASSF10  |  |  |  |  |
|  |  | ZFPL1    |  |  |  |  |
|  |  | LLGL2    |  |  |  |  |
|  |  | STRN4    |  |  |  |  |
|  |  | APOBR    |  |  |  |  |
|  |  | PTER     |  |  |  |  |
|  |  | NUP85    |  |  |  |  |
|  |  | TTC30B   |  |  |  |  |
|  |  | TARBP1   |  |  |  |  |
|  |  | AKAP3    |  |  |  |  |

|  |  |            |  |  |  |  |
|--|--|------------|--|--|--|--|
|  |  | INTS13     |  |  |  |  |
|  |  | PTPN4      |  |  |  |  |
|  |  | ZCCHC24    |  |  |  |  |
|  |  | RRP15      |  |  |  |  |
|  |  | INHBA      |  |  |  |  |
|  |  | FUZ        |  |  |  |  |
|  |  | RPL23      |  |  |  |  |
|  |  | MAGT1      |  |  |  |  |
|  |  | CCNT1      |  |  |  |  |
|  |  | MRGPRX3    |  |  |  |  |
|  |  | PARP12     |  |  |  |  |
|  |  | MED27      |  |  |  |  |
|  |  | STRCP1     |  |  |  |  |
|  |  | MYNN       |  |  |  |  |
|  |  | ZC3H4      |  |  |  |  |
|  |  | CTSC       |  |  |  |  |
|  |  | MT1F       |  |  |  |  |
|  |  | ZNF439     |  |  |  |  |
|  |  | BZW1       |  |  |  |  |
|  |  | HEY2       |  |  |  |  |
|  |  | XPO1       |  |  |  |  |
|  |  | BAHD1      |  |  |  |  |
|  |  | LCN12      |  |  |  |  |
|  |  | SLC35C2    |  |  |  |  |
|  |  | SET        |  |  |  |  |
|  |  | MT-TA      |  |  |  |  |
|  |  | APLF       |  |  |  |  |
|  |  | SPATA13    |  |  |  |  |
|  |  | C2orf49-DT |  |  |  |  |
|  |  | PIAS3      |  |  |  |  |



|  |  |            |  |  |  |  |
|--|--|------------|--|--|--|--|
|  |  | GIPR       |  |  |  |  |
|  |  | ERN2       |  |  |  |  |
|  |  | PPHLN1     |  |  |  |  |
|  |  | RALGAPB    |  |  |  |  |
|  |  | STXBP4     |  |  |  |  |
|  |  | GIT1       |  |  |  |  |
|  |  | EXOC4      |  |  |  |  |
|  |  | MZF1       |  |  |  |  |
|  |  | DUOX1      |  |  |  |  |
|  |  | PLAGL2     |  |  |  |  |
|  |  | WDR76      |  |  |  |  |
|  |  | FBXO44     |  |  |  |  |
|  |  | KLHDC7B    |  |  |  |  |
|  |  | TIMP4      |  |  |  |  |
|  |  | KANSL2     |  |  |  |  |
|  |  | MTA3       |  |  |  |  |
|  |  | SF1        |  |  |  |  |
|  |  | SNORD104   |  |  |  |  |
|  |  | SZRD1      |  |  |  |  |
|  |  | VPS37D     |  |  |  |  |
|  |  | TOLLIP-AS1 |  |  |  |  |
|  |  | ENDOU      |  |  |  |  |
|  |  | DPEP1      |  |  |  |  |
|  |  | OSBP       |  |  |  |  |
|  |  | TRIP11     |  |  |  |  |
|  |  | ARSK       |  |  |  |  |
|  |  | ZNF668     |  |  |  |  |
|  |  | GAK        |  |  |  |  |
|  |  | CPNE5      |  |  |  |  |
|  |  | ARHGAP33   |  |  |  |  |

|  |  |           |  |  |  |  |
|--|--|-----------|--|--|--|--|
|  |  | LINC02178 |  |  |  |  |
|  |  | ARHGEF6   |  |  |  |  |
|  |  | MANEA-DT  |  |  |  |  |
|  |  | HOXB5     |  |  |  |  |
|  |  | SLC52A1   |  |  |  |  |
|  |  | TBC1D13   |  |  |  |  |
|  |  | ZNF134    |  |  |  |  |
|  |  | HACL1     |  |  |  |  |
|  |  | RAD23B    |  |  |  |  |
|  |  | ABTB1     |  |  |  |  |
|  |  | FAM200B   |  |  |  |  |
|  |  | APCDD1L   |  |  |  |  |
|  |  | ILF3-DT   |  |  |  |  |
|  |  | USP6NL    |  |  |  |  |
|  |  | LINC01572 |  |  |  |  |
|  |  | LCLAT1    |  |  |  |  |
|  |  | NUP42     |  |  |  |  |
|  |  | PGAM1     |  |  |  |  |
|  |  | DHX8      |  |  |  |  |
|  |  | WDR93     |  |  |  |  |
|  |  | DENND2D   |  |  |  |  |
|  |  | CINP      |  |  |  |  |
|  |  | UBE2O     |  |  |  |  |
|  |  | TMED5     |  |  |  |  |
|  |  | AQP3      |  |  |  |  |
|  |  | LINC02569 |  |  |  |  |
|  |  | SCNN1B    |  |  |  |  |
|  |  | LCOR      |  |  |  |  |
|  |  | LIN52     |  |  |  |  |
|  |  | SP140     |  |  |  |  |

|  |  |           |  |  |  |  |
|--|--|-----------|--|--|--|--|
|  |  | MLXIPL    |  |  |  |  |
|  |  | LINC02580 |  |  |  |  |
|  |  | SUFU      |  |  |  |  |
|  |  | LUC7L3    |  |  |  |  |
|  |  | LINC01010 |  |  |  |  |
|  |  | P2RY6     |  |  |  |  |
|  |  | NAA20     |  |  |  |  |
|  |  | UBE2D1    |  |  |  |  |
|  |  | C21orf91  |  |  |  |  |
|  |  | NUDT17    |  |  |  |  |
|  |  | ARFRP1    |  |  |  |  |
|  |  | SLC13A4   |  |  |  |  |
|  |  | CRYZL1    |  |  |  |  |
|  |  | FGFR1OP2  |  |  |  |  |
|  |  | KHSRP     |  |  |  |  |
|  |  | PITPNA    |  |  |  |  |
|  |  | NUTF2     |  |  |  |  |
|  |  | C15orf62  |  |  |  |  |
|  |  | YJU2      |  |  |  |  |
|  |  | CUEDC2    |  |  |  |  |
|  |  | ZNF192P1  |  |  |  |  |
|  |  | STARD3NL  |  |  |  |  |
|  |  | TADA2B    |  |  |  |  |
|  |  | BBS7      |  |  |  |  |
|  |  | STK40     |  |  |  |  |
|  |  | TMEM208   |  |  |  |  |
|  |  | CRTAP     |  |  |  |  |
|  |  | MARCHF7   |  |  |  |  |
|  |  | NSD2      |  |  |  |  |
|  |  | BNIP2     |  |  |  |  |

|  |  |            |  |  |  |  |
|--|--|------------|--|--|--|--|
|  |  | CDC20      |  |  |  |  |
|  |  | MCOLN3     |  |  |  |  |
|  |  | RYBP       |  |  |  |  |
|  |  | MINDY3     |  |  |  |  |
|  |  | SH3BP1     |  |  |  |  |
|  |  | FBXO42     |  |  |  |  |
|  |  | DNAH14     |  |  |  |  |
|  |  | TFEB       |  |  |  |  |
|  |  | GRHL2      |  |  |  |  |
|  |  | TBK1       |  |  |  |  |
|  |  | PCGF2      |  |  |  |  |
|  |  | ZNF594     |  |  |  |  |
|  |  | FAM43A     |  |  |  |  |
|  |  | TMEM217    |  |  |  |  |
|  |  | MCF2L      |  |  |  |  |
|  |  | TAF6       |  |  |  |  |
|  |  | SNAP25-AS1 |  |  |  |  |
|  |  | MICE       |  |  |  |  |
|  |  | TMEM106A   |  |  |  |  |
|  |  | BCAM       |  |  |  |  |
|  |  | THEMIS2    |  |  |  |  |
|  |  | RXRA       |  |  |  |  |
|  |  | CHD9       |  |  |  |  |
|  |  | ZNF496     |  |  |  |  |
|  |  | SLC7A11    |  |  |  |  |
|  |  | INTS8      |  |  |  |  |
|  |  | ARL6       |  |  |  |  |
|  |  | TNKS2      |  |  |  |  |
|  |  | SAE1       |  |  |  |  |
|  |  | RPL27      |  |  |  |  |

|  |  |           |  |  |  |  |
|--|--|-----------|--|--|--|--|
|  |  | WIZ       |  |  |  |  |
|  |  | RUVBL2    |  |  |  |  |
|  |  | GTF2H3    |  |  |  |  |
|  |  | TOB2P1    |  |  |  |  |
|  |  | ATXN7L2   |  |  |  |  |
|  |  | DOLPP1    |  |  |  |  |
|  |  | TRAPPC2L  |  |  |  |  |
|  |  | LPP-AS2   |  |  |  |  |
|  |  | BTRC      |  |  |  |  |
|  |  | MIR100HG  |  |  |  |  |
|  |  | CSRNP1    |  |  |  |  |
|  |  | HAUS4     |  |  |  |  |
|  |  | SUPT3H    |  |  |  |  |
|  |  | GBF1      |  |  |  |  |
|  |  | MCRS1     |  |  |  |  |
|  |  | OOSP3     |  |  |  |  |
|  |  | CENPBD1P1 |  |  |  |  |
|  |  | FSIP2     |  |  |  |  |
|  |  | LINC02084 |  |  |  |  |
|  |  | BUB3      |  |  |  |  |
|  |  | PECAM1    |  |  |  |  |
|  |  | PHLDB2    |  |  |  |  |
|  |  | ARHGAP21  |  |  |  |  |
|  |  | RIC8B     |  |  |  |  |
|  |  | INPP5E    |  |  |  |  |
|  |  | SENP2     |  |  |  |  |
|  |  | PTPN11    |  |  |  |  |
|  |  | GRHL3     |  |  |  |  |
|  |  | TRIO      |  |  |  |  |
|  |  | APOC1     |  |  |  |  |

|  |  |           |  |  |  |  |
|--|--|-----------|--|--|--|--|
|  |  | ARF3      |  |  |  |  |
|  |  | ARMC9     |  |  |  |  |
|  |  | ANKRD50   |  |  |  |  |
|  |  | NOL11     |  |  |  |  |
|  |  | ARHGAP31  |  |  |  |  |
|  |  | PLXNA2    |  |  |  |  |
|  |  | ERGIC1    |  |  |  |  |
|  |  | MARVELD2  |  |  |  |  |
|  |  | MYO15A    |  |  |  |  |
|  |  | LINC02519 |  |  |  |  |
|  |  | MIR137HG  |  |  |  |  |
|  |  | BET1      |  |  |  |  |
|  |  | CHTOP     |  |  |  |  |
|  |  | PRMT3     |  |  |  |  |
|  |  | C3orf38   |  |  |  |  |
|  |  | PITX2     |  |  |  |  |
|  |  | JAK3      |  |  |  |  |
|  |  | AGAP1     |  |  |  |  |
|  |  | TENM3     |  |  |  |  |
|  |  | GRASLND   |  |  |  |  |
|  |  | SAMD1     |  |  |  |  |
|  |  | PRAG1     |  |  |  |  |
|  |  | FAM161B   |  |  |  |  |
|  |  | CYP2A13   |  |  |  |  |
|  |  | MRAS      |  |  |  |  |
|  |  | ORC5      |  |  |  |  |
|  |  | ZC4H2     |  |  |  |  |
|  |  | THUMPD2   |  |  |  |  |
|  |  | RAB35     |  |  |  |  |
|  |  | SUSD1     |  |  |  |  |

|  |  |           |  |  |  |  |
|--|--|-----------|--|--|--|--|
|  |  | TRMT11    |  |  |  |  |
|  |  | MAP1S     |  |  |  |  |
|  |  | LTA4H     |  |  |  |  |
|  |  | C12orf56  |  |  |  |  |
|  |  | CD44      |  |  |  |  |
|  |  | ZNF780B   |  |  |  |  |
|  |  | RNF4      |  |  |  |  |
|  |  | PSMC6     |  |  |  |  |
|  |  | PLEK2     |  |  |  |  |
|  |  | ENY2      |  |  |  |  |
|  |  | FAM83D    |  |  |  |  |
|  |  | CDPF1     |  |  |  |  |
|  |  | CD83      |  |  |  |  |
|  |  | SLC35A1   |  |  |  |  |
|  |  | TBC1D23   |  |  |  |  |
|  |  | KLF5      |  |  |  |  |
|  |  | LINC02701 |  |  |  |  |
|  |  | TP53BP1   |  |  |  |  |
|  |  | CWC25     |  |  |  |  |
|  |  | BANP      |  |  |  |  |
|  |  | LAMA3     |  |  |  |  |
|  |  | C1orf43   |  |  |  |  |
|  |  | ABALON    |  |  |  |  |
|  |  | GSS       |  |  |  |  |
|  |  | ARPP19    |  |  |  |  |
|  |  | MAGED2    |  |  |  |  |
|  |  | LINC02323 |  |  |  |  |
|  |  | TAGLN     |  |  |  |  |
|  |  | VASH1     |  |  |  |  |
|  |  | KIF5B     |  |  |  |  |

|  |  |             |  |  |  |  |
|--|--|-------------|--|--|--|--|
|  |  | USP3-AS1    |  |  |  |  |
|  |  | CLMP        |  |  |  |  |
|  |  | TMEM44      |  |  |  |  |
|  |  | APBA3       |  |  |  |  |
|  |  | PRPF40B     |  |  |  |  |
|  |  | DMAP1       |  |  |  |  |
|  |  | TRMT61A     |  |  |  |  |
|  |  | VAPA        |  |  |  |  |
|  |  | ABHD8       |  |  |  |  |
|  |  | BICD2       |  |  |  |  |
|  |  | ATL1        |  |  |  |  |
|  |  | PM20D1      |  |  |  |  |
|  |  | CCDC190     |  |  |  |  |
|  |  | LINC00514   |  |  |  |  |
|  |  | PDE6A       |  |  |  |  |
|  |  | TIAM2       |  |  |  |  |
|  |  | MED16       |  |  |  |  |
|  |  | SART1       |  |  |  |  |
|  |  | PTBP2       |  |  |  |  |
|  |  | CD58        |  |  |  |  |
|  |  | YWHAZ       |  |  |  |  |
|  |  | NACC2       |  |  |  |  |
|  |  | UTP4        |  |  |  |  |
|  |  | PLSCR4      |  |  |  |  |
|  |  | H4-16       |  |  |  |  |
|  |  | CENPC       |  |  |  |  |
|  |  | SLC44A3-AS1 |  |  |  |  |
|  |  | TENM1       |  |  |  |  |
|  |  | ZNF696      |  |  |  |  |
|  |  | CCN6        |  |  |  |  |



|  |  |           |  |  |  |  |
|--|--|-----------|--|--|--|--|
|  |  | ACTR5     |  |  |  |  |
|  |  | MT1L      |  |  |  |  |
|  |  | RPS2      |  |  |  |  |
|  |  | RGP1      |  |  |  |  |
|  |  | SEC22A    |  |  |  |  |
|  |  | LINC01410 |  |  |  |  |
|  |  | DM1-AS    |  |  |  |  |
|  |  | SMCO4     |  |  |  |  |
|  |  | TRMT10B   |  |  |  |  |
|  |  | RPL37     |  |  |  |  |
|  |  | TLE2      |  |  |  |  |
|  |  | PUDP      |  |  |  |  |
|  |  | C1orf21   |  |  |  |  |
|  |  | UBE2T     |  |  |  |  |
|  |  | NLRC5     |  |  |  |  |
|  |  | ZBTB24    |  |  |  |  |
|  |  | CRACR2B   |  |  |  |  |
|  |  | SPATA2    |  |  |  |  |
|  |  | ZCCHC14   |  |  |  |  |
|  |  | UBTD2     |  |  |  |  |
|  |  | NOP14-AS1 |  |  |  |  |
|  |  | WTAPP1    |  |  |  |  |
|  |  | SOD2-OT1  |  |  |  |  |
|  |  | MED4      |  |  |  |  |
|  |  | GJC1      |  |  |  |  |
|  |  | LINC02878 |  |  |  |  |
|  |  | ELAVL1    |  |  |  |  |
|  |  | PRKAA1    |  |  |  |  |
|  |  | CD2AP-DT  |  |  |  |  |
|  |  | SCD       |  |  |  |  |

|  |  |           |  |  |  |  |
|--|--|-----------|--|--|--|--|
|  |  | ASB9      |  |  |  |  |
|  |  | CCNG2     |  |  |  |  |
|  |  | MFSD14C   |  |  |  |  |
|  |  | TRAM2     |  |  |  |  |
|  |  | SRCIN1    |  |  |  |  |
|  |  | SNUPN     |  |  |  |  |
|  |  | GLI1      |  |  |  |  |
|  |  | TMTC4     |  |  |  |  |
|  |  | MMP19     |  |  |  |  |
|  |  | PAFAH1B3  |  |  |  |  |
|  |  | RAB10     |  |  |  |  |
|  |  | PPM1N     |  |  |  |  |
|  |  | WWC2      |  |  |  |  |
|  |  | GOLGA6L5P |  |  |  |  |
|  |  | LNCTAM34A |  |  |  |  |
|  |  | STAT5A    |  |  |  |  |
|  |  | YY1       |  |  |  |  |
|  |  | TMEM187   |  |  |  |  |
|  |  | GOPC      |  |  |  |  |
|  |  | DZIP1L    |  |  |  |  |
|  |  | RNF224    |  |  |  |  |
|  |  | GBP1      |  |  |  |  |
|  |  | TCEAL9    |  |  |  |  |
|  |  | PRPF39    |  |  |  |  |
|  |  | IFI6      |  |  |  |  |
|  |  | MFSD4B    |  |  |  |  |
|  |  | P2RX7     |  |  |  |  |
|  |  | DST       |  |  |  |  |
|  |  | PNO1      |  |  |  |  |
|  |  | NAGK      |  |  |  |  |

|  |  |           |  |  |  |  |
|--|--|-----------|--|--|--|--|
|  |  | SMIM31    |  |  |  |  |
|  |  | SCD5      |  |  |  |  |
|  |  | PIPOX     |  |  |  |  |
|  |  | FAAHP1    |  |  |  |  |
|  |  | GNG12-AS1 |  |  |  |  |
|  |  | IGHMBP2   |  |  |  |  |
|  |  | CIAO2B    |  |  |  |  |
|  |  | SMIM30    |  |  |  |  |
|  |  | RAD52     |  |  |  |  |
|  |  | TSACC     |  |  |  |  |
|  |  | NHEJ1     |  |  |  |  |
|  |  | SAMHD1    |  |  |  |  |
|  |  | STIP1     |  |  |  |  |
|  |  | CCDC22    |  |  |  |  |
|  |  | MGAT2     |  |  |  |  |
|  |  | KPNA1     |  |  |  |  |
|  |  | RRP1B     |  |  |  |  |
|  |  | RHOBTB1   |  |  |  |  |
|  |  | CCDC106   |  |  |  |  |
|  |  | BBS5      |  |  |  |  |
|  |  | C4B       |  |  |  |  |
|  |  | PLBD2     |  |  |  |  |
|  |  | ARRDC3    |  |  |  |  |
|  |  | CENPH     |  |  |  |  |
|  |  | HMCN2     |  |  |  |  |
|  |  | UNC79     |  |  |  |  |
|  |  | CNOT6LP1  |  |  |  |  |
|  |  | PTK7      |  |  |  |  |
|  |  | BLCAP     |  |  |  |  |
|  |  | FAM182B   |  |  |  |  |

|  |  |           |  |  |  |  |
|--|--|-----------|--|--|--|--|
|  |  | HCN3      |  |  |  |  |
|  |  | TUB       |  |  |  |  |
|  |  | LDLRAD2   |  |  |  |  |
|  |  | MEX3C     |  |  |  |  |
|  |  | PAPOLA    |  |  |  |  |
|  |  | PHF21A    |  |  |  |  |
|  |  | HAAO      |  |  |  |  |
|  |  | DUSP8P5   |  |  |  |  |
|  |  | LINC00638 |  |  |  |  |
|  |  | LINC01135 |  |  |  |  |
|  |  | RPP14     |  |  |  |  |
|  |  | ZNF213    |  |  |  |  |
|  |  | ACTR1B    |  |  |  |  |
|  |  | EMC9      |  |  |  |  |
|  |  | HERC2P3   |  |  |  |  |
|  |  | DGKQ      |  |  |  |  |
|  |  | KLHDC7A   |  |  |  |  |
|  |  | KRT83     |  |  |  |  |
|  |  | DCAF6     |  |  |  |  |
|  |  | GPR63     |  |  |  |  |
|  |  | CA11      |  |  |  |  |
|  |  | GAS2L2    |  |  |  |  |
|  |  | AASDHPPT  |  |  |  |  |
|  |  | TMC8      |  |  |  |  |
|  |  | AGA       |  |  |  |  |
|  |  | CYP1A1    |  |  |  |  |
|  |  | ZFP91     |  |  |  |  |
|  |  | LYRM4-AS1 |  |  |  |  |
|  |  | ABCA4     |  |  |  |  |
|  |  | ADAM21    |  |  |  |  |

|  |  |           |  |  |  |  |
|--|--|-----------|--|--|--|--|
|  |  | CDC34     |  |  |  |  |
|  |  | MFSD9     |  |  |  |  |
|  |  | SNORC     |  |  |  |  |
|  |  | CAMK4     |  |  |  |  |
|  |  | TP53BP2   |  |  |  |  |
|  |  | TRPV3     |  |  |  |  |
|  |  | IGF2R     |  |  |  |  |
|  |  | TSGA10    |  |  |  |  |
|  |  | CDCA3     |  |  |  |  |
|  |  | PACRGL    |  |  |  |  |
|  |  | EXT2      |  |  |  |  |
|  |  | LINC01695 |  |  |  |  |
|  |  | ODF3B     |  |  |  |  |
|  |  | GTF2F1    |  |  |  |  |
|  |  | HMGA2     |  |  |  |  |
|  |  | C15orf56  |  |  |  |  |
|  |  | ZNF500    |  |  |  |  |
|  |  | DHX15     |  |  |  |  |
|  |  | DDX20     |  |  |  |  |
|  |  | IL18      |  |  |  |  |
|  |  | MALINC1   |  |  |  |  |
|  |  | CIPC      |  |  |  |  |
|  |  | ENOX2     |  |  |  |  |
|  |  | SNHG19    |  |  |  |  |
|  |  | ATIC      |  |  |  |  |
|  |  | ZNF22-AS1 |  |  |  |  |
|  |  | NMT2      |  |  |  |  |
|  |  | HSD17B1   |  |  |  |  |
|  |  | MAP6D1    |  |  |  |  |
|  |  | SHLD2     |  |  |  |  |

|  |  |           |  |  |  |  |
|--|--|-----------|--|--|--|--|
|  |  | ZSCAN2    |  |  |  |  |
|  |  | PUM1      |  |  |  |  |
|  |  | WDR5-DT   |  |  |  |  |
|  |  | TRIM13    |  |  |  |  |
|  |  | ABHD2     |  |  |  |  |
|  |  | NEB       |  |  |  |  |
|  |  | ENDOV     |  |  |  |  |
|  |  | TK1       |  |  |  |  |
|  |  | RFX1      |  |  |  |  |
|  |  | CECR7     |  |  |  |  |
|  |  | TMEM267   |  |  |  |  |
|  |  | PCNT      |  |  |  |  |
|  |  | TTLL1     |  |  |  |  |
|  |  | ABHD17AP4 |  |  |  |  |
|  |  | C2orf68   |  |  |  |  |
|  |  | NUPR2     |  |  |  |  |
|  |  | ESD       |  |  |  |  |
|  |  | POC1B-AS1 |  |  |  |  |
|  |  | CNFN      |  |  |  |  |
|  |  | WDR5B     |  |  |  |  |
|  |  | UBE2K     |  |  |  |  |
|  |  | PGGT1B    |  |  |  |  |
|  |  | RTF1      |  |  |  |  |
|  |  | SEPTIN10  |  |  |  |  |
|  |  | SLC31A1   |  |  |  |  |
|  |  | CDV3      |  |  |  |  |
|  |  | TPP1      |  |  |  |  |
|  |  | TDG       |  |  |  |  |
|  |  | UBE2SP1   |  |  |  |  |
|  |  | ZNF815P   |  |  |  |  |

|  |  |             |  |  |  |  |
|--|--|-------------|--|--|--|--|
|  |  | NOC4L       |  |  |  |  |
|  |  | CENPA       |  |  |  |  |
|  |  | AMIGO1      |  |  |  |  |
|  |  | XKR6        |  |  |  |  |
|  |  | UBE2R2      |  |  |  |  |
|  |  | ARMC2       |  |  |  |  |
|  |  | ZNF252P-AS1 |  |  |  |  |
|  |  | POLL        |  |  |  |  |
|  |  | AHNAK2      |  |  |  |  |
|  |  | TFIP11-DT   |  |  |  |  |
|  |  | RRP1        |  |  |  |  |
|  |  | CCDC113     |  |  |  |  |
|  |  | LINC00865   |  |  |  |  |
|  |  | KCNMB2-AS1  |  |  |  |  |
|  |  | SCAF1       |  |  |  |  |
|  |  | GALNT13     |  |  |  |  |
|  |  | CHD3        |  |  |  |  |
|  |  | SEPTIN3     |  |  |  |  |
|  |  | HLA-DRB9    |  |  |  |  |
|  |  | RPS4XP16    |  |  |  |  |
|  |  | YBX1P2      |  |  |  |  |
|  |  | WNT7A       |  |  |  |  |
|  |  | LINC00339   |  |  |  |  |
|  |  | PDXDC1      |  |  |  |  |
|  |  | RPRD1B      |  |  |  |  |
|  |  | MIF4GD-DT   |  |  |  |  |
|  |  | KCTD8       |  |  |  |  |
|  |  | POMK        |  |  |  |  |
|  |  | TOE1        |  |  |  |  |
|  |  | TOB1        |  |  |  |  |

|  |  |            |  |  |  |  |
|--|--|------------|--|--|--|--|
|  |  | RCL1       |  |  |  |  |
|  |  | ZNF346-IT1 |  |  |  |  |
|  |  | PHLPP2     |  |  |  |  |
|  |  | NAGPA      |  |  |  |  |
|  |  | PPCDC      |  |  |  |  |
|  |  | VWA7       |  |  |  |  |
|  |  | CCDC157    |  |  |  |  |
|  |  | ZNF230     |  |  |  |  |
|  |  | KATNIP     |  |  |  |  |
|  |  | LRRC15     |  |  |  |  |
|  |  | CD36       |  |  |  |  |
|  |  | CCDC96     |  |  |  |  |
|  |  | TMEM140    |  |  |  |  |
|  |  | VPS25      |  |  |  |  |
|  |  | CLK4       |  |  |  |  |
|  |  | CDIP1      |  |  |  |  |
|  |  | PAGR1      |  |  |  |  |
|  |  | NIP7       |  |  |  |  |
|  |  | ZDHHC9     |  |  |  |  |
|  |  | LINC01232  |  |  |  |  |
|  |  | PRRT2      |  |  |  |  |
|  |  | FAM172A    |  |  |  |  |
|  |  | FOLH1      |  |  |  |  |
|  |  | HPCAL4     |  |  |  |  |
|  |  | MC1R       |  |  |  |  |
|  |  | CD2AP      |  |  |  |  |
|  |  | RNPEP      |  |  |  |  |
|  |  | NUDT4      |  |  |  |  |
|  |  | IFI44      |  |  |  |  |
|  |  | SETD1A     |  |  |  |  |



|  |  |           |  |  |  |  |
|--|--|-----------|--|--|--|--|
|  |  | TCHP      |  |  |  |  |
|  |  | ZNF316    |  |  |  |  |
|  |  | FNDC5     |  |  |  |  |
|  |  | GPS2P2    |  |  |  |  |
|  |  | ALKBH6    |  |  |  |  |
|  |  | RPL35AP9  |  |  |  |  |
|  |  | RNF170    |  |  |  |  |
|  |  | GAB3      |  |  |  |  |
|  |  | ACRBP     |  |  |  |  |
|  |  | IFT57     |  |  |  |  |
|  |  | NR2C2AP   |  |  |  |  |
|  |  | POLE3     |  |  |  |  |
|  |  | PCDHGA4   |  |  |  |  |
|  |  | GSTM2     |  |  |  |  |
|  |  | USP12     |  |  |  |  |
|  |  | HOXC9     |  |  |  |  |
|  |  | FOXN1     |  |  |  |  |
|  |  | BCCIP     |  |  |  |  |
|  |  | POC1B     |  |  |  |  |
|  |  | PLEKHA3   |  |  |  |  |
|  |  | IFT80     |  |  |  |  |
|  |  | MIER1     |  |  |  |  |
|  |  | APLN      |  |  |  |  |
|  |  | ATF1      |  |  |  |  |
|  |  | EXOSC2    |  |  |  |  |
|  |  | ZDHHC8    |  |  |  |  |
|  |  | EPSTI1    |  |  |  |  |
|  |  | ZSCAN22   |  |  |  |  |
|  |  | MACROH2A2 |  |  |  |  |
|  |  | PRKAB1    |  |  |  |  |

|  |  |             |  |  |  |  |
|--|--|-------------|--|--|--|--|
|  |  | SIDT2       |  |  |  |  |
|  |  | TCF7L1      |  |  |  |  |
|  |  | TYMS        |  |  |  |  |
|  |  | ISOC1       |  |  |  |  |
|  |  | NMRAL2P     |  |  |  |  |
|  |  | CD177       |  |  |  |  |
|  |  | FAM234A     |  |  |  |  |
|  |  | TRABD2B     |  |  |  |  |
|  |  | N4BP2L2-IT2 |  |  |  |  |
|  |  | COPS2       |  |  |  |  |
|  |  | PSMA5       |  |  |  |  |
|  |  | MGST2       |  |  |  |  |
|  |  | LRP5        |  |  |  |  |
|  |  | FSIP2-AS1   |  |  |  |  |
|  |  | RPAIN       |  |  |  |  |
|  |  | RSPO4       |  |  |  |  |
|  |  | DPM1        |  |  |  |  |
|  |  | ZFP2        |  |  |  |  |
|  |  | ZNF726      |  |  |  |  |
|  |  | CXCL8       |  |  |  |  |
|  |  | PTP4A3      |  |  |  |  |
|  |  | SVIL2P      |  |  |  |  |
|  |  | RIN2        |  |  |  |  |
|  |  | HNRNPDL     |  |  |  |  |
|  |  | ZSCAN5A-AS1 |  |  |  |  |
|  |  | IGFBP7-AS1  |  |  |  |  |
|  |  | RAVER1      |  |  |  |  |
|  |  | PLK4        |  |  |  |  |
|  |  | CGB5        |  |  |  |  |
|  |  | BCL3        |  |  |  |  |

|  |  |           |  |  |  |  |
|--|--|-----------|--|--|--|--|
|  |  | SMNDC1    |  |  |  |  |
|  |  | ZNF175    |  |  |  |  |
|  |  | ATP6V0B   |  |  |  |  |
|  |  | ZNF561    |  |  |  |  |
|  |  | GORASP1   |  |  |  |  |
|  |  | URM1      |  |  |  |  |
|  |  | UPF3A     |  |  |  |  |
|  |  | RASSF7    |  |  |  |  |
|  |  | FAM167B   |  |  |  |  |
|  |  | C1QTNF2   |  |  |  |  |
|  |  | ATP6V1C1  |  |  |  |  |
|  |  | SLC15A3   |  |  |  |  |
|  |  | EVA1C     |  |  |  |  |
|  |  | SLC2A3P2  |  |  |  |  |
|  |  | AUP1      |  |  |  |  |
|  |  | DNASE1    |  |  |  |  |
|  |  | TMEM115   |  |  |  |  |
|  |  | PKMYT1    |  |  |  |  |
|  |  | VAV1      |  |  |  |  |
|  |  | SKAP1     |  |  |  |  |
|  |  | ADK       |  |  |  |  |
|  |  | MYH11     |  |  |  |  |
|  |  | LINC01138 |  |  |  |  |
|  |  | ARAP1     |  |  |  |  |
|  |  | PAQR3     |  |  |  |  |
|  |  | ZBED4     |  |  |  |  |
|  |  | PIGZ      |  |  |  |  |
|  |  | ASS1P2    |  |  |  |  |
|  |  | KLHL41    |  |  |  |  |
|  |  | CARD17    |  |  |  |  |

|  |  |           |  |  |  |  |
|--|--|-----------|--|--|--|--|
|  |  | RPL34     |  |  |  |  |
|  |  | BRF2      |  |  |  |  |
|  |  | CFAP94    |  |  |  |  |
|  |  | TYRO3     |  |  |  |  |
|  |  | ORAI1     |  |  |  |  |
|  |  | THOC7     |  |  |  |  |
|  |  | FAM160A2  |  |  |  |  |
|  |  | SLC35F6   |  |  |  |  |
|  |  | NINJ2-AS1 |  |  |  |  |
|  |  | RECQL     |  |  |  |  |
|  |  | MATN1-AS1 |  |  |  |  |
|  |  | CDON      |  |  |  |  |
|  |  | ARHGAP27  |  |  |  |  |
|  |  | PABPC3    |  |  |  |  |
|  |  | HAUS3     |  |  |  |  |
|  |  | CTAGE4    |  |  |  |  |
|  |  | AK7       |  |  |  |  |
|  |  | ALMS1-IT1 |  |  |  |  |
|  |  | PSD2      |  |  |  |  |
|  |  | COX5BP6   |  |  |  |  |
|  |  | EXOSC8    |  |  |  |  |
|  |  | GRK3      |  |  |  |  |
|  |  | HNRNPA0   |  |  |  |  |
|  |  | MYL5      |  |  |  |  |
|  |  | RSBN1L    |  |  |  |  |
|  |  | IBSP      |  |  |  |  |
|  |  | ZNF317    |  |  |  |  |
|  |  | ENTPD4    |  |  |  |  |
|  |  | STXBP5    |  |  |  |  |
|  |  | MINDY1    |  |  |  |  |

|  |  |            |  |  |  |  |
|--|--|------------|--|--|--|--|
|  |  | NUAK2      |  |  |  |  |
|  |  | HIPK2      |  |  |  |  |
|  |  | VIRMA      |  |  |  |  |
|  |  | GIMAP6     |  |  |  |  |
|  |  | LINC00667  |  |  |  |  |
|  |  | SNORA73B   |  |  |  |  |
|  |  | AP4B1      |  |  |  |  |
|  |  | KLHDC7B-DT |  |  |  |  |
|  |  | AMZ2       |  |  |  |  |
|  |  | MAPKAPK5   |  |  |  |  |
|  |  | RIPOR1     |  |  |  |  |
|  |  | UPF3B      |  |  |  |  |
|  |  | RAPGEF1    |  |  |  |  |
|  |  | NR2C1      |  |  |  |  |
|  |  | LINC00910  |  |  |  |  |
|  |  | RSPH4A     |  |  |  |  |
|  |  | UBALD2     |  |  |  |  |
|  |  | POLR3K     |  |  |  |  |
|  |  | LINC02615  |  |  |  |  |
|  |  | FRG1EP     |  |  |  |  |
|  |  | ACOT8      |  |  |  |  |
|  |  | FES        |  |  |  |  |
|  |  | GTF2A1     |  |  |  |  |
|  |  | CANT1      |  |  |  |  |
|  |  | ZNF516     |  |  |  |  |
|  |  | TMEM102    |  |  |  |  |
|  |  | PHETA1     |  |  |  |  |
|  |  | MAP7D3     |  |  |  |  |
|  |  | PPARGC1A   |  |  |  |  |
|  |  | ZNF782     |  |  |  |  |

|  |  |           |  |  |  |  |
|--|--|-----------|--|--|--|--|
|  |  | EGFL6     |  |  |  |  |
|  |  | PRDM2     |  |  |  |  |
|  |  | EXD3      |  |  |  |  |
|  |  | POLR1G    |  |  |  |  |
|  |  | MYO7B     |  |  |  |  |
|  |  | SMIM7     |  |  |  |  |
|  |  | C15orf65  |  |  |  |  |
|  |  | G3BP2     |  |  |  |  |
|  |  | MAP3K14   |  |  |  |  |
|  |  | KLF2      |  |  |  |  |
|  |  | ARHGAP32  |  |  |  |  |
|  |  | MLLT10    |  |  |  |  |
|  |  | HOXD13    |  |  |  |  |
|  |  | TSG101    |  |  |  |  |
|  |  | CYTH1     |  |  |  |  |
|  |  | TTPAL     |  |  |  |  |
|  |  | TONSL-AS1 |  |  |  |  |
|  |  | RPS20P14  |  |  |  |  |
|  |  | DEGS2     |  |  |  |  |
|  |  | ZNF674    |  |  |  |  |
|  |  | RPS6P25   |  |  |  |  |
|  |  | CCDC17    |  |  |  |  |
|  |  | MFHAS1    |  |  |  |  |
|  |  | ANKDD1B   |  |  |  |  |
|  |  | SPINT1    |  |  |  |  |
|  |  | VWDE      |  |  |  |  |
|  |  | IFT122    |  |  |  |  |
|  |  | ODAM      |  |  |  |  |
|  |  | FRMD4A    |  |  |  |  |
|  |  | TSNAX     |  |  |  |  |

|  |  |              |  |  |  |  |
|--|--|--------------|--|--|--|--|
|  |  | SARNP        |  |  |  |  |
|  |  | CTC-338M12.4 |  |  |  |  |
|  |  | MATN1        |  |  |  |  |
|  |  | NFIB         |  |  |  |  |
|  |  | HMGB1        |  |  |  |  |
|  |  | RUNDC1       |  |  |  |  |
|  |  | C1orf35      |  |  |  |  |
|  |  | TTLL9        |  |  |  |  |
|  |  | TANGO2       |  |  |  |  |
|  |  | LINC02031    |  |  |  |  |
|  |  | TYRP1        |  |  |  |  |
|  |  | SLC15A2      |  |  |  |  |
|  |  | ZNF543       |  |  |  |  |
|  |  | M6PR         |  |  |  |  |
|  |  | PCOLCE       |  |  |  |  |
|  |  | OTUD6B       |  |  |  |  |
|  |  | EPS8L3       |  |  |  |  |
|  |  | MUC12-AS1    |  |  |  |  |
|  |  | NFYAP1       |  |  |  |  |
|  |  | PKNOX1       |  |  |  |  |
|  |  | PIGS         |  |  |  |  |
|  |  | FUT6         |  |  |  |  |
|  |  | C19orf47     |  |  |  |  |
|  |  | TSC22D1      |  |  |  |  |
|  |  | SOX15        |  |  |  |  |
|  |  | P3H3         |  |  |  |  |
|  |  | TMEM144      |  |  |  |  |
|  |  | ABCA7        |  |  |  |  |
|  |  | CHMP4B       |  |  |  |  |
|  |  | DHX9         |  |  |  |  |

|  |  |          |  |  |  |  |
|--|--|----------|--|--|--|--|
|  |  | PHF7     |  |  |  |  |
|  |  | RRBP1    |  |  |  |  |
|  |  | RSRC2    |  |  |  |  |
|  |  | TMEM260  |  |  |  |  |
|  |  | CDH24    |  |  |  |  |
|  |  | TGS1     |  |  |  |  |
|  |  | RWDD2A   |  |  |  |  |
|  |  | NANP     |  |  |  |  |
|  |  | PSENEN   |  |  |  |  |
|  |  | KDM7A-DT |  |  |  |  |
|  |  | RPL31    |  |  |  |  |
|  |  | LARP6    |  |  |  |  |
|  |  | GUSBP3   |  |  |  |  |
|  |  | BTN2A3P  |  |  |  |  |
|  |  | PPM1D    |  |  |  |  |
|  |  | THNSL2   |  |  |  |  |
|  |  | TNNT3    |  |  |  |  |
|  |  | TMEM209  |  |  |  |  |
|  |  | SFSWAP   |  |  |  |  |
|  |  | HSPA4    |  |  |  |  |
|  |  | SYK      |  |  |  |  |
|  |  | PIP4P2   |  |  |  |  |
|  |  | H2BC18   |  |  |  |  |
|  |  | CELSR2   |  |  |  |  |
|  |  | UBQLN1   |  |  |  |  |
|  |  | NFKBIB   |  |  |  |  |
|  |  | SEC61G   |  |  |  |  |
|  |  | UMAD1    |  |  |  |  |
|  |  | FANK1    |  |  |  |  |
|  |  | SFR1     |  |  |  |  |



|  |  |           |  |  |  |  |
|--|--|-----------|--|--|--|--|
|  |  | RPAP3     |  |  |  |  |
|  |  | GTF2IP12  |  |  |  |  |
|  |  | ZFAT      |  |  |  |  |
|  |  | GLUD1P3   |  |  |  |  |
|  |  | PLRG1     |  |  |  |  |
|  |  | STAM      |  |  |  |  |
|  |  | SYNCRIP   |  |  |  |  |
|  |  | XPO5      |  |  |  |  |
|  |  | SETBP1    |  |  |  |  |
|  |  | RTCA-AS1  |  |  |  |  |
|  |  | PDIA3P1   |  |  |  |  |
|  |  | C11orf24  |  |  |  |  |
|  |  | CHEK1     |  |  |  |  |
|  |  | PTPN2     |  |  |  |  |
|  |  | RRM1      |  |  |  |  |
|  |  | FAM214B   |  |  |  |  |
|  |  | EID3      |  |  |  |  |
|  |  | SUSD2     |  |  |  |  |
|  |  | LINC01355 |  |  |  |  |
|  |  | CD24      |  |  |  |  |
|  |  | FNDC4     |  |  |  |  |
|  |  | TRPM2     |  |  |  |  |
|  |  | EP400P1   |  |  |  |  |
|  |  | HERC2P4   |  |  |  |  |
|  |  | LINC02535 |  |  |  |  |
|  |  | CDC5L     |  |  |  |  |
|  |  | SLC16A12  |  |  |  |  |
|  |  | SOCS7     |  |  |  |  |
|  |  | RNF125    |  |  |  |  |
|  |  | RGS2      |  |  |  |  |

|  |  |           |  |  |  |  |
|--|--|-----------|--|--|--|--|
|  |  | CDC42EP4  |  |  |  |  |
|  |  | PFDN1     |  |  |  |  |
|  |  | UPP1      |  |  |  |  |
|  |  | LINC01550 |  |  |  |  |
|  |  | TTLL12    |  |  |  |  |
|  |  | MISP3     |  |  |  |  |
|  |  | TNFRSF11B |  |  |  |  |
|  |  | GANAB     |  |  |  |  |
|  |  | EMSLR     |  |  |  |  |
|  |  | PCDHB12   |  |  |  |  |
|  |  | POTEF     |  |  |  |  |
|  |  | EFEMP1    |  |  |  |  |
|  |  | PSG5      |  |  |  |  |
|  |  | LRIF1     |  |  |  |  |
|  |  | FAR2P4    |  |  |  |  |
|  |  | STARD5    |  |  |  |  |
|  |  | CHM       |  |  |  |  |
|  |  | LSM12P1   |  |  |  |  |
|  |  | APH1A     |  |  |  |  |
|  |  | FBN2      |  |  |  |  |
|  |  | GAB1      |  |  |  |  |
|  |  | THRA      |  |  |  |  |
|  |  | MT-TF     |  |  |  |  |
|  |  | NOP58     |  |  |  |  |
|  |  | BEND6     |  |  |  |  |
|  |  | HIP1      |  |  |  |  |
|  |  | ZNF713    |  |  |  |  |
|  |  | TIAM1     |  |  |  |  |
|  |  | RRS1      |  |  |  |  |
|  |  | TNIP2     |  |  |  |  |

|  |  |               |  |  |  |  |
|--|--|---------------|--|--|--|--|
|  |  | BRD3          |  |  |  |  |
|  |  | EAPP          |  |  |  |  |
|  |  | ZMYND8        |  |  |  |  |
|  |  | RNF5P1        |  |  |  |  |
|  |  | IGFBP4        |  |  |  |  |
|  |  | GTF2IP1       |  |  |  |  |
|  |  | DNPEP         |  |  |  |  |
|  |  | ZNF670-ZNF695 |  |  |  |  |
|  |  | ATP6V1B1      |  |  |  |  |
|  |  | DECR2         |  |  |  |  |
|  |  | PDIA5         |  |  |  |  |
|  |  | CYP46A1       |  |  |  |  |
|  |  | LCAT          |  |  |  |  |
|  |  | SP2-AS1       |  |  |  |  |
|  |  | BACE1         |  |  |  |  |
|  |  | CCDC77        |  |  |  |  |
|  |  | PABPC1        |  |  |  |  |
|  |  | RPE           |  |  |  |  |
|  |  | LINC01569     |  |  |  |  |
|  |  | CTSL          |  |  |  |  |
|  |  | BAZ1A         |  |  |  |  |
|  |  | ZNF460        |  |  |  |  |
|  |  | RAD51AP1      |  |  |  |  |
|  |  | VPS4B         |  |  |  |  |
|  |  | UBE2I         |  |  |  |  |
|  |  | ASL           |  |  |  |  |
|  |  | LMTK3         |  |  |  |  |
|  |  | HIPK1-AS1     |  |  |  |  |
|  |  | YBX1          |  |  |  |  |
|  |  | CDC20P1       |  |  |  |  |

|  |  |             |  |  |  |  |
|--|--|-------------|--|--|--|--|
|  |  | ORC4        |  |  |  |  |
|  |  | ARRDC2      |  |  |  |  |
|  |  | ZNF12       |  |  |  |  |
|  |  | CRTC1       |  |  |  |  |
|  |  | INTS6-AS1   |  |  |  |  |
|  |  | IFT22       |  |  |  |  |
|  |  | LINC01127   |  |  |  |  |
|  |  | LINC01979   |  |  |  |  |
|  |  | SERGEF      |  |  |  |  |
|  |  | RAB11FIP5   |  |  |  |  |
|  |  | PCDHGA7     |  |  |  |  |
|  |  | HGSNAT      |  |  |  |  |
|  |  | TRIM62      |  |  |  |  |
|  |  | EPM2AIP1    |  |  |  |  |
|  |  | CD320       |  |  |  |  |
|  |  | DGKZ        |  |  |  |  |
|  |  | JAZF1       |  |  |  |  |
|  |  | SCML1       |  |  |  |  |
|  |  | TAX1BP3     |  |  |  |  |
|  |  | PTENP1-AS   |  |  |  |  |
|  |  | EIF2AK1     |  |  |  |  |
|  |  | PMEL        |  |  |  |  |
|  |  | CTDSPL      |  |  |  |  |
|  |  | ST3GAL4     |  |  |  |  |
|  |  | TFAP2A-AS2  |  |  |  |  |
|  |  | SIRT1       |  |  |  |  |
|  |  | RABGAP1L-DT |  |  |  |  |
|  |  | UBE2Q2P1    |  |  |  |  |
|  |  | SRSF11      |  |  |  |  |
|  |  | LINC00702   |  |  |  |  |

|  |  |           |  |  |  |  |
|--|--|-----------|--|--|--|--|
|  |  | MAGED1    |  |  |  |  |
|  |  | DPY19L2P1 |  |  |  |  |
|  |  | ETF1      |  |  |  |  |
|  |  | ING3      |  |  |  |  |
|  |  | CEP131    |  |  |  |  |
|  |  | SIAE      |  |  |  |  |
|  |  | ALS2      |  |  |  |  |
|  |  | SEPTIN7   |  |  |  |  |
|  |  | NLRP2     |  |  |  |  |
|  |  | SP9       |  |  |  |  |
|  |  | BRD9      |  |  |  |  |
|  |  | RNF34     |  |  |  |  |
|  |  | IRF2BPL   |  |  |  |  |
|  |  | USP33     |  |  |  |  |
|  |  | DDX23     |  |  |  |  |
|  |  | NSMF      |  |  |  |  |
|  |  | BLACAT1   |  |  |  |  |
|  |  | ZNF24     |  |  |  |  |
|  |  | BCYRN1    |  |  |  |  |
|  |  | LINC01869 |  |  |  |  |
|  |  | SMKR1     |  |  |  |  |
|  |  | ANAPC5    |  |  |  |  |
|  |  | KRT80     |  |  |  |  |
|  |  | PEAR1     |  |  |  |  |
|  |  | GABARAPL2 |  |  |  |  |
|  |  | PTCHD4    |  |  |  |  |
|  |  | COMMD1    |  |  |  |  |
|  |  | TMEM135   |  |  |  |  |
|  |  | LTV1      |  |  |  |  |
|  |  | RHOJ      |  |  |  |  |

|  |  |           |  |  |  |  |
|--|--|-----------|--|--|--|--|
|  |  | STX19     |  |  |  |  |
|  |  | ZRANB3    |  |  |  |  |
|  |  | TBC1D2    |  |  |  |  |
|  |  | POLR2KP1  |  |  |  |  |
|  |  | TEX264    |  |  |  |  |
|  |  | KPNB1     |  |  |  |  |
|  |  | CEP250    |  |  |  |  |
|  |  | LINC01060 |  |  |  |  |
|  |  | FAAP24    |  |  |  |  |
|  |  | TRIM9     |  |  |  |  |
|  |  | ZNF764    |  |  |  |  |
|  |  | RABEPK    |  |  |  |  |
|  |  | S1PR1     |  |  |  |  |
|  |  | ZNF330    |  |  |  |  |
|  |  | KRT86     |  |  |  |  |
|  |  | GDF9      |  |  |  |  |
|  |  | HMGN3-AS1 |  |  |  |  |
|  |  | FBXO48    |  |  |  |  |
|  |  |           |  |  |  |  |
